# Supplementary material for: Where will the next flank eruption at Etna occur? An updated spatial probabilistic assessment
Source: Copernicus journal article supplement (doi:10.5194/egusphere-2023-2624), 2023-11-30
Supplement: Supplementary file 1 [file egusphere-2023-2624-supplement.zip]

Archive with 2 entries (2 files):
- Etna_vent_Supplementary.pdf
- Probability_Models_Flank_Etna.csv
