# Supplementary material for: Where will the next flank eruption at Etna occur? An updated spatial probabilistic assessment
Source: Copernicus journal article supplement (doi:10.5194/egusphere-2023-2624), 2023-11-30
Supplement: Supplementary file 1 [file egusphere-2023-2624-supplement.zip › Probability_Models_Flank_Etna.csv]

Lon UTM – Easting (m)	Lat UTM- Northing (m)	Elevation (m a.s.l.)	Probability - Canonical map	Probability - All data - Volumetric Source	Probability - All data - FlankSlip Source	Probability - All data - Volumetric + FlankSlip Sources	Probability – Only data since 1600CE - no deformation model	Probability - Only data since 1600CE - Volumetric Source	Probability - Only data since 1600CE - FlankSlip Source	Probability - Only data since 1600CE - Volumetric + FlankSlip Sources
482590	4156090	165.046997070312	4.32498681585852E-11	8.44905725278162E-12	2.47277071209714E-11	1.43277238674111E-11	1.5270458726401E-13	3.58349112258622E-14	2.65961571427006E-13	9.70019246160565E-14
482790	4156090	175.843994140625	4.8677218051254E-11	9.42181286617797E-12	2.82703838053958E-11	1.62281871774028E-11	1.80988898634053E-13	4.11327116243231E-14	3.17553605640411E-13	1.14603842322918E-13
482990	4156090	181.625	5.47677822231353E-11	1.05012753355323E-11	3.23132844878471E-11	1.83773692163037E-11	2.14534109890791E-13	4.72003935121725E-14	3.79083329735497E-13	1.35412157498646E-13
483190	4156090	196.156997680664	6.1599840976724E-11	1.16983891763003E-11	3.69259850733457E-11	2.08073682498102E-11	2.54319166229792E-13	5.41482873788445E-14	4.52448474791128E-13	1.60012219770681E-13
483390	4156090	189.003005981445	6.92605533032805E-11	1.30251155373438E-11	4.21875938167593E-11	2.35543709879648E-11	3.01504456367423E-13	6.21024036724074E-14	5.39905277543638E-13	1.89096165802761E-13
483590	4156090	195.014999389648	7.7846930317702E-11	1.44945118184801E-11	4.81880383453282E-11	2.6659167672578E-11	3.57465148912291E-13	7.12066611607996E-14	6.44135282201766E-13	2.23482307975385E-13
483790	4156090	216.225997924805	8.74669148625725E-11	1.61208157746275E-11	5.50295240242261E-11	3.01677318238999E-11	4.23830559319307E-13	8.16254344316788E-14	7.68324368991055E-13	2.64138006598235E-13
483990	4156090	236.376998901367	9.82405858738615E-11	1.79195411163713E-11	6.28281863647119E-11	3.41318773203052E-11	5.02530622513252E-13	9.3546467692495E-14	9.16256194353697E-13	3.1220664091145E-13
484190	4156090	212.348007202148	1.10301516486795E-10	1.99075716522304E-11	7.17160360414816E-11	3.86100200609186E-11	5.95850723799238E-13	1.07184210127756E-13	1.09242260546954E-12	3.69039400461495E-13
484390	4156090	230.406005859375	1.23798251794965E-10	2.21032684683273E-11	8.18430429675467E-11	4.36679981156082E-11	7.06496406773894E-13	1.22783701650672E-13	1.30215403331352E-12	4.3623278982671E-13
484590	4156090	235.996994018555	1.38895938394029E-10	2.45265666395281E-11	9.33794749525665E-11	4.93799769730843E-11	8.37669496275681E-13	1.40624855314495E-13	1.55177337258342E-12	5.15672666045333E-13
484790	4156090	244.664001464844	1.55778189016038E-10	2.719908721471E-11	1.06518666308218E-10	5.58295196106152E-11	9.93157822499981E-13	1.61027451212826E-13	1.84877747172125E-12	6.09586135713513E-13
484990	4156090	224.95100402832	1.74649153049316E-10	3.01442627045017E-11	1.21480105406342E-10	6.31107802216794E-11	1.17744089923158E-12	1.84356968396892E-13	2.20205112891026E-12	7.20602705724235E-13
485190	4156090	201.725006103516	1.95735824578707E-10	3.33874520284507E-11	1.3851291224028E-10	7.13298318248857E-11	1.39581402966089E-12	2.11031011882213E-13	2.62211877957808E-12	8.51825887143795E-13
485390	4156090	208.348007202148	2.19290626360547E-10	3.69560569261114E-11	1.57899777299806E-10	8.06061611573747E-11	1.65453411874923E-12	2.41526627537984E-13	3.1214407302255E-12	1.00691728890396E-12
485590	4156090	179.473007202148	2.45594333530826E-10	4.08796865901909E-11	1.79961436371796E-10	9.10743877004366E-11	1.96099131999434E-12	2.76389254466431E-13	3.71476186303334E-12	1.19019585782844E-12
485790	4156090	171.5	2.74959344451572E-10	4.51902962735462E-11	2.05061716761801E-10	1.02886172087533E-10	2.32391007538499E-12	3.16242505233489E-13	4.41952088927678E-12	1.4067538167841E-12
485990	4156090	187.205993652344	3.07733362608667E-10	4.99223370050261E-11	2.3361323980568E-10	1.1621236827941E-10	2.75358481080138E-12	3.61799413309041E-13	5.25633067874632E-12	1.66259256812728E-12
486190	4156090	189.434005737305	3.44303416063881E-10	5.51129122039617E-11	2.6608349844855E-10	1.31245315386754E-10	3.26215600224366E-12	4.13875367158395E-13	6.24954145974167E-12	1.96478185789132E-12
486390	4156090	154.774002075195	3.8510058805707E-10	6.08019513483901E-11	3.03002251872244E-10	1.48201615350369E-10	3.8639331856565E-12	4.73402927173497E-13	7.42790046997281E-12	2.32164595360598E-12
486590	4156090	127.646003723145	4.30605436428667E-10	6.70323975716138E-11	3.44970088246549E-10	1.67325340763921E-10	4.57577249966289E-12	5.41448796951658E-13	8.82532374046826E-12	2.74298120249465E-12
486790	4156090	130.647003173828	4.81353881268492E-10	7.38504094981916E-11	3.92667385197193E-10	1.8889139519825E-10	5.41751749770041E-12	6.19233403894297E-13	1.04817980651745E-11	3.24031010155713E-12
486990	4156090	70.5770034790039	5.37944011802479E-10	8.1305645547553E-11	4.46864721911284E-10	2.13209449791913E-10	6.41251352889435E-12	7.08154309079207E-13	1.24444339229405E-11	3.82717829421627E-12
487190	4156090	68.4759979248047	6.0104371524895E-10	8.94512569645273E-11	5.08434576553294E-10	2.40628156786138E-10	7.58820506165E-12	8.09808134909909E-13	1.47686923211932E-11	4.51949669509618E-12
487390	4156090	67.2379989624023	6.71399438647E-10	9.83443200740559E-11	5.7836450154954E-10	2.71540177224672E-10	8.97683293031873E-12	9.26022377807995E-13	1.75198139061267E-11	5.3359446263015E-12
487590	4156090	67.5719985961914	7.49846081110261E-10	1.08046091843964E-10	6.57771930695637E-10	3.06387683918641E-10	1.06162429469852E-11	1.05888855173374E-12	2.07744798553422E-11	6.29843552411208E-12
487790	4156090	67.2839965820312	8.37318228261386E-10	1.18622282318856E-10	7.47920814471009E-10	3.45668534439945E-10	1.25508236363953E-11	1.21079984845221E-12	2.46227396950035E-11	7.43265689515723E-12
487990	4156090	63.257999420166	9.34862921793601E-10	1.30143380668733E-10	8.50240293548195E-10	3.89943213389467E-10	1.48325921785739E-11	1.38449451527344E-12	2.91702453634909E-11	8.7686958534308E-12
488190	4156090	71.7440032958984	1.04365417030206E-09	1.4268501940984E-10	9.66345638898414E-10	4.39842616407355E-10	1.75224497319356E-11	1.58310533912621E-12	3.45408356782185E-11	1.03417622577994E-11
488390	4156090	69.765998840332	1.1650094206901E-09	1.56328372990147E-10	1.09806169694071E-09	4.96076759464448E-10	2.06916296997249E-11	1.81021592779497E-12	4.08795204781889E-11	1.21930230509783E-11
488590	4156090	91.1419982910156	1.30040827037355E-09	1.71160609044614E-10	1.24744912150685E-09	5.59444526756865E-10	2.44233656437398E-11	2.06992478140716E-12	4.83559196922793E-11	1.43705632114183E-11
488790	4156090	106.310997009277	1.45151370168907E-09	1.87275392748942E-10	1.41683367685185E-09	6.30844559962671E-10	2.8814807986441E-11	2.36691804492979E-12	5.7168218197923E-11	1.69304901463852E-11
488990	4156090	106.310997009277	1.62019619566258E-09	2.04773495042619E-10	1.60883892870244E-09	7.1128743566991E-10	3.39792224022173E-11	2.70655269705665E-12	6.75477036351879E-11	1.99382006639398E-11
489190	4156090	107.363998413086	1.80856102724663E-09	2.2376342642E-10	1.8264226612508E-09	8.01909202672391E-10	4.00485037568033E-11	3.09494984350348E-12	7.97639605338877E-11	2.34698297736105E-11
489390	4156090	108.872001647949	2.01897909838454E-09	2.44362063562753E-10	2.07291736206295E-09	9.03986381476073E-10	4.71760428074026E-11	3.53909859400095E-12	9.41307999070095E-11	2.76139027016728E-11
489590	4156090	111.861999511719	2.25412188500324E-09	2.66695468334444E-10	2.35207516081252E-09	1.01895269292657E-09	5.55399894998879E-11	4.04697497770794E-12	1.1101300966449E-10	3.24732160753219E-11
489790	4156090	114.81600189209	2.51700099857576E-09	2.90899959599461E-10	2.66811761102065E-09	1.14841769499576E-09	6.53469568044176E-11	4.62767833438057E-12	1.3083401608723E-10	3.81669740462643E-11
489990	4156090	119.766998291016	2.81101271150967E-09	3.17123283616346E-10	3.02579072676272E-09	1.29418737748329E-09	7.68362063412762E-11	5.29158404346688E-12	1.54084550927406E-10	4.48332036473097E-11
490190	4156090	133.046005249023	3.13998790048241E-09	3.45525210076E-10	3.43042561416638E-09	1.4582864062249E-09	9.02843585046097E-11	6.05049983739704E-12	1.81332418647585E-10	5.26314651274831E-11
490390	4156090	146.34700012207	3.50824860806196E-09	3.76279541527759E-10	3.88800527988949E-09	1.64298349960315E-09	1.06010688174786E-10	6.91786494901324E-12	2.13233465640385E-10	6.17459131642022E-11
490590	4156090	140.151000976562	3.92067107020442E-09	4.09575163430452E-10	4.40523776366049E-09	1.85081847093729E-09	1.24383033885163E-10	7.90895165023448E-12	2.50543840324244E-10	7.23887028632507E-11
490790	4156090	148.97200012207	4.382756550486E-09	4.45617801697042E-10	4.98963620500832E-09	2.08463222410483E-09	1.45824372951346E-10	9.04109567134846E-12	2.94133635221167E-10	8.48037842171342E-11
490990	4156090	152.720001220703	4.90071031713121E-09	4.84631491437019E-10	5.64960604178959E-09	2.34759913564297E-09	1.70820089059718E-10	1.03339368990062E-11	3.45001983278954E-10	9.92710905585617E-11
491190	4156090	163.130004882812	5.48153007413663E-09	5.26861244694361E-10	6.39453981298662E-09	2.64326294638161E-09	1.99925979062102E-10	1.18097092865133E-11	4.04293674936372E-10	1.16111167283142E-10
491390	4156090	179.363998413086	6.13310401340204E-09	5.7257506745989E-10	7.23491957044573E-09	2.97557497972907E-09	2.33776990998684E-10	1.34935339266281E-11	4.73317318657025E-10	1.35690213049047E-10
491590	4156090	192.005004882812	6.8643197760499E-09	6.22066496800433E-10	8.18242716904482E-09	3.34893553349614E-09	2.73096704900179E-10	1.54137416051139E-11	5.53565047570931E-10	1.58425553490081E-10
491790	4156090	211.483001708984	7.68518518898947E-09	6.75657651199704E-10	9.25006242790009E-09	3.76823843809723E-09	3.18707531380481E-10	1.7602222953132E-11	6.46733722519882E-10	1.84791532851523E-10
491990	4156090	230.82600402832	8.60696117855517E-09	7.33701617644744E-10	1.04522689678551E-08	4.23891795744384E-09	3.71541561399677E-10	2.00947804381314E-11	7.5474752103603E-10	2.15325775267528E-10
492190	4156090	247.514999389648	9.64230853345474E-09	7.96585838948433E-10	1.18050674360819E-08	4.76699899340509E-09	4.32651997974924E-10	2.29315118392716E-11	8.797817293273E-10	2.50635788850183E-10
492390	4156090	247.792007446289	1.08054491290028E-08	8.64736124768379E-10	1.33261955446058E-08	5.35915014591216E-09	5.03225028171169E-10	2.61572147092216E-11	1.02428745983591E-09	2.91405831153673E-10
492590	4156090	241.826995849609	1.2112342124771E-08	9.38619638109023E-10	1.50352539776218E-08	6.02273823230807E-09	5.8459193311556E-10	2.9821763058344E-11	1.19101690014166E-09	3.38403895428006E-10
492790	4156090	246.037994384766	1.35808762921175E-08	1.01874826210541E-09	1.69538570374328E-08	6.76588475784621E-09	6.78241192961241E-10	3.39804840750434E-11	1.38304857004433E-09	3.92488699072698E-10
492990	4156090	280.196990966797	1.52310799421287E-08	1.10568429743909E-09	1.9105786534964E-08	7.59752504742171E-09	7.85830276789628E-10	3.86945694614027E-11	1.60381190596938E-09	4.54616518767795E-10
493190	4156090	294.403991699219	1.70853502706739E-08	1.20004534123875E-09	2.1517147874915E-08	8.52746764313971E-09	9.09196688170056E-10	4.40314287018759E-11	1.85711029961026E-09	5.25847572181542E-10
493390	4156090	294.81298828125	1.91686989688753E-08	1.3025081935024E-09	2.42165237461628E-08	9.56645221391358E-09	1.05036771170974E-09	5.00649706289289E-11	2.14714152342998E-09	6.07351652596794E-10
493590	4156090	273.934997558594	2.15090123445144E-08	1.41381260294434E-09	2.72351203351369E-08	1.07262046641613E-08	1.21156820501217E-09	5.6875800816487E-11	2.47851421697942E-09	7.00412654920753E-10
493790	4156090	268.049011230469	2.41373354812994E-08	1.53476693912877E-09	3.06069069676918E-08	1.20194911043814E-08	1.39522585444264E-09	6.45513701275682E-11	2.85625892840461E-09	8.06431618932527E-10
493990	4156090	268.493988037109	2.70881798819942E-08	1.66625290592361E-09	3.43687467625668E-08	1.34601679644995E-08	1.60397290578047E-09	7.31859860367662E-11	3.28583186369132E-09	9.26927733906682E-10
494190	4156090	269.772003173828	3.03998483773628E-08	1.80923026726727E-09	3.85605076301617E-08	1.5063225025077E-08	1.84064331246459E-09	8.28806481177086E-11	3.77310927224117E-09	1.06353672580253E-09
494390	4156090	270.736999511719	3.41147800576192E-08	1.96474175723305E-09	4.32251477245694E-08	1.68448193516164E-08	2.10826427584942E-09	9.37426782510597E-11	4.32437013487325E-09	1.21800598518702E-09
494590	4156090	274.191009521484	3.82799170198574E-08	2.13391782188345E-09	4.840877203635E-08	1.88222987115973E-08	2.41004090996797E-09	1.05885123665457E-10	4.94626458398027E-09	1.3921857368E-09
494790	4156090	281.415008544922	4.2947092466906E-08	2.31798056202692E-09	5.4160651859373E-08	2.10142110889955E-08	2.74933269486522E-09	1.19425863778943E-10	5.64576529334706E-09	1.58801546595533E-09
494990	4156090	278.273010253906	4.81734409702772E-08	2.51824555363263E-09	6.05331994603948E-08	2.34402966824789E-08	3.1296203127273E-09	1.34486332399645E-10	6.43009895401598E-09	1.80750477052558E-09
495190	4156090	270.721984863281	5.40218337025228E-08	2.736126269739E-09	6.75818904284084E-08	2.61214626992996E-08	3.55446153036908E-09	1.5118993240358E-10	7.30665495295113E-09	2.05270792898657E-09
495390	4156090	269.346984863281	6.05613396999007E-08	2.97313673239571E-09	7.53651254322729E-08	2.90797351627353E-08	4.027434784084E-09	1.69659997091195E-10	8.28286846228392E-09	2.32569133541854E-09
495590	4156090	264.373992919922	6.7867715661308E-08	3.23089256797845E-09	8.39440239242074E-08	3.23381851531046E-08	4.55206919650218E-09	1.90017252914216E-10	9.36607545783071E-09	2.62849310880664E-09
495790	4156090	255.279998779297	7.60239308002245E-08	3.51111209926517E-09	9.33821430295265E-08	3.59208280908871E-08	5.13176014315873E-09	2.12376789566551E-10	1.05633376890463E-08	2.96307435546423E-09
495990	4156090	247.561996459961	8.51207322676116E-08	3.81561548544799E-09	1.03745116241107E-07	3.98524928480179E-08	5.76966977600227E-09	2.36844513754497E-10	1.18812363837944E-08	3.33126174388002E-09
496190	4156090	260.425994873047	9.52572686186941E-08	4.1463268286473E-09	1.15100211644435E-07	4.41586637386973E-08	6.46861251318E-09	2.63513184440741E-10	1.33256345551375E-08	3.73468142854688E-09
496390	4156090	265.789001464844	1.06541778144212E-07	4.50527041459839E-09	1.27515806626221E-07	4.88652886355661E-08	7.23092572264417E-09	2.92457663353891E-10	1.49014089573422E-08	4.17468433200734E-09
496590	4156090	264.220001220703	1.19092323193105E-07	4.89456458141266E-09	1.41060767485036E-07	5.39985512726311E-08	8.05832732830791E-09	3.23729807962516E-10	1.661215470805E-08	4.65226390067432E-09
496790	4156090	260.858001708984	1.33037651105551E-07	5.31642125324638E-09	1.55803766801701E-07	5.95846247321092E-08	8.95176274599586E-09	3.57353152360218E-10	1.84598674750812E-08	5.16796774297564E-09
496990	4156090	250.839004516602	1.48518234469624E-07	5.77315188541812E-09	1.71812563153332E-07	6.56494154601724E-08	9.91124451461314E-09	3.93317407700471E-10	2.04446103437083E-08	5.72180506399305E-09
497190	4156090	263.548004150391	1.65687442074277E-07	6.26716583859444E-09	1.89153231296979E-07	7.22182845767156E-08	1.09356889870846E-08	4.31572640625748E-10	2.25641748768257E-08	6.31315232038359E-09
497390	4156090	266.558990478516	1.84712929663502E-07	6.80097418027497E-09	2.07889391060224E-07	7.93157722003553E-08	1.20227562664983E-08	4.72023680095037E-10	2.4813748688517E-08	6.94066077393538E-09
497590	4156090	264.730010986328	2.05778308066429E-07	7.37719835021915E-09	2.28081478064823E-07	8.69653399823385E-08	1.31687003824834E-08	5.14524906070759E-10	2.71856041908924E-08	7.60216995214084E-09
497790	4156090	273.186004638672	2.29085146676091E-07	7.99858531877634E-09	2.49786104582639E-07	9.51891503127039E-08	1.43682378704203E-08	5.58875708942625E-10	2.96688254521229E-08	8.29463172901569E-09
497990	4156090	283.108001708984	2.54855381046411E-07	8.66803080098856E-09	2.73055570763749E-07	1.04007904926164E-07	1.56144437580938E-08	6.04816938455091E-10	3.2249091851698E-08	9.01405022588153E-09
498190	4156090	280.317993164062	2.83334196798389E-07	9.38861146493777E-09	2.97937594942156E-07	1.13440768288448E-07	1.68986844437669E-08	6.52028677480685E-10	3.49085382153467E-08	9.75544300878962E-09
498390	4156090	282.710998535156	3.14793475217061E-07	1.01636335606875E-08	3.24475338264367E-07	1.23505407657123E-07	1.82105969574426E-08	7.00129723747292E-10	3.76257110971977E-08	1.05128290904042E-08
498590	4156090	293.826995849609	3.495358660356E-07	1.09966931698516E-08	3.52707800844733E-07	1.34218174588053E-07	1.95381234145909E-08	7.48678963750848E-10	4.0375639582515E-08	1.12792487541333E-08
498790	4156090	295.281005859375	3.87899587607555E-07	1.18917532669232E-08	3.82670673994024E-07	1.45594461704707E-07	2.08676081968712E-08	7.97178892824433E-10	4.31300362605274E-08	1.20468195457146E-08
498990	4156090	297.596984863281	4.30303500640272E-07	1.28539234848984E-08	4.14409523219492E-07	1.57653956411442E-07	2.21839634294693E-08	8.45081769732379E-10	4.58576397408775E-08	1.28068318133875E-08
499190	4156090	298.954010009766	4.77237174672997E-07	1.38893036260421E-08	4.47976817235008E-07	1.70419469358311E-07	2.34709053135077E-08	8.91798254659045E-10	4.85247041895861E-08	1.35498851407586E-08
499390	4156090	307.915985107422	5.29282461476933E-07	1.50053914912812E-08	4.83436026309579E-07	1.83918673769258E-07	2.47112604330314E-08	9.36708455681407E-10	5.10956341114273E-08	1.42660651461516E-08
499590	4156090	321.054992675781	5.87110667555374E-07	1.62110499857608E-08	5.20863793440784E-07	1.98184867564165E-07	2.58873372411164E-08	9.79175345988244E-10	5.3533754313134E-08	1.4945157945937E-08
499790	4156090	340.989013671875	6.51480709169512E-07	1.75165054782131E-08	5.60351363776771E-07	2.13257488022775E-07	2.69813533522731E-08	1.01856002781121E-09	5.58021958744603E-08	1.55768968019238E-08
499990	4156090	352.071014404297	7.23220584605556E-07	1.89330714176425E-08	6.01998962454928E-07	2.29179907482769E-07	2.79759052683748E-08	1.05423847245026E-09	5.78648702479078E-08	1.61512332720573E-08
500190	4156090	331.923004150391	8.03203834809277E-07	2.04727875035232E-08	6.45909871284678E-07	2.45997066386262E-07	2.88544633935515E-08	1.08561939910503E-09	5.96874955692455E-08	1.66586230719923E-08
500390	4156090	360.005004882812	8.92515783493509E-07	2.21514219674837E-08	6.92243144520983E-07	2.63776407411867E-07	2.96018713195086E-08	1.11216207768744E-09	6.12386322038363E-08	1.7090314335094E-08
500590	4156090	354.307006835938	9.92401826252731E-07	2.39875575500009E-08	7.41197976923488E-07	2.82601653050593E-07	3.02048268914664E-08	1.13339344756221E-09	6.24906806352839E-08	1.74386253629134E-08
500790	4156090	368.428009033203	1.10422525358696E-06	2.60019193532045E-08	7.93005485632234E-07	3.02569411798499E-07	3.06523217534806E-08	1.14892376818252E-09	6.34207932947397E-08	1.76971984281175E-08
500990	4156090	370.369995117188	1.22933144787071E-06	2.82150532825347E-08	8.47897169108017E-07	3.23776317034734E-07	3.09360168699844E-08	1.15846000218974E-09	6.40116536764875E-08	1.78612166448605E-08
501190	4156090	371.029998779297	1.36953935441241E-06	3.06556234903238E-08	9.06205693382806E-07	3.46360688104886E-07	3.10505339517848E-08	1.1618160323552E-09	6.42520812445194E-08	1.79275722196589E-08
501390	4156090	347.170989990234	1.52690126145727E-06	3.33564652241463E-08	9.68318461311159E-07	3.70483258490968E-07	3.09936470103048E-08	1.15891947952091E-09	6.41374290416198E-08	1.78949771189424E-08
501590	4156090	340.72900390625	1.70358399727943E-06	3.63526829763132E-08	1.03465560199546E-06	3.96318020553074E-07	3.07663630524128E-08	1.14981445330891E-09	6.3669751748749E-08	1.77640097491617E-08
501790	4156090	335.252990722656	1.9019617669642E-06	3.96830830425244E-08	1.10567883019257E-06	4.24056338375215E-07	3.03728874539352E-08	1.13466009139431E-09	6.28577346061413E-08	1.75370949954935E-08
501990	4156090	328.864990234375	2.12461032182402E-06	4.33900165154258E-08	1.18188290443625E-06	4.53903767150764E-07	2.98204760460059E-08	1.11372515599964E-09	6.17163871868042E-08	1.72184188769753E-08
502190	4156090	323.218994140625	2.37429395654135E-06	4.75190732997118E-08	1.26378327074741E-06	4.86075401528668E-07	2.91191820106573E-08	1.08737885977458E-09	6.02665191140867E-08	1.68137824864093E-08
502390	4156090	326.56298828125	2.65394464374538E-06	5.21186127473018E-08	1.35189971610211E-06	5.20789680275006E-07	2.8281511584241E-08	1.05607850614546E-09	5.85340266008636E-08	1.63304033186528E-08
502590	4156090	322.855010986328	2.96663319512799E-06	5.72391226371043E-08	1.44673609109583E-06	5.5826066337225E-07	2.73220069018168E-08	1.02035417087174E-09	5.65490281119185E-08	1.57766743319418E-08
502790	4156090	328.023010253906	3.31513647269938E-06	6.29258277822627E-08	1.54869345611239E-06	5.98661976395877E-07	2.62567780295789E-08	9.80792136599808E-10	5.43448942236101E-08	1.51618939775993E-08
502990	4156090	321.941009521484	3.7010071548825E-06	6.92038727521241E-08	1.65791101373214E-06	6.42059956571403E-07	2.51030069545501E-08	9.38016890925251E-10	5.1957219658576E-08	1.44959798082885E-08
503190	4156090	318.190002441406	4.12594850027571E-06	7.61011408767412E-08	1.77446442517215E-06	6.88499785671216E-07	2.38784471685467E-08	8.9267329646291E-10	4.94227856640619E-08	1.37891796465973E-08
503390	4156090	313.138000488281	4.591032610035E-06	8.36339464420494E-08	1.89821093464468E-06	7.37940473900761E-07	2.26009400315366E-08	8.45409119398183E-10	4.67785575483789E-08	1.30517923597307E-08
503590	4156090	313.921997070312	5.09629084968281E-06	9.18007676962855E-08	2.02871282402963E-06	7.90223241547165E-07	2.12879670585379E-08	7.96858917745308E-10	4.40607565585714E-08	1.2293909388195E-08
503790	4156090	315.005004882812	5.64029313682715E-06	1.00575453063457E-07	2.16515965380063E-06	8.4503912544031E-07	1.99562533153814E-08	7.47629786039742E-10	4.13040376528685E-08	1.1525185778287E-08
503990	4156090	318.322998046875	6.21961224040847E-06	1.09898640948621E-07	2.30627976798291E-06	9.01891569537754E-07	1.86214329321878E-08	6.98289331316219E-10	3.85407960330511E-08	1.07546470698485E-08
504190	4156090	322.661987304688	6.82814682258439E-06	1.19666946232317E-07	2.45023958412834E-06	9.60053180060836E-07	1.72977834064829E-08	6.49356118884885E-10	3.58006162748873E-08	9.99053589179034E-09
504390	4156090	309.156005859375	7.45626288047046E-06	1.29719488461524E-07	2.59452943439948E-06	1.01851592803769E-06	1.59980311805127E-08	6.01292676632074E-10	3.31098692120095E-08	9.2401997005362E-09
504590	4156090	312.085998535156	8.0897501007863E-06	1.39821716904481E-07	2.73583784816193E-06	1.07593545229605E-06	1.47332272232915E-08	5.54501012282976E-10	3.04914539443244E-08	8.51001892931828E-09
504790	4156090	308.028991699219	8.70871749366895E-06	1.49647786704234E-07	2.86992728846286E-06	1.13057495882957E-06	1.35126882478361E-08	5.09320529831184E-10	2.79646758559249E-08	7.8053730425414E-09
504990	4156090	296.667999267578	9.28654520124376E-06	1.58765920094917E-07	2.99155251725141E-06	1.18026640509018E-06	1.2343996694672E-08	4.66028011121986E-10	2.5545246525249E-08	7.13064049837863E-09
505190	4156090	312.018005371094	9.78975109125752E-06	1.66637193286731E-07	3.09451704753473E-06	1.22243008079748E-06	1.12330509581618E-08	4.24839238790879E-10	2.32453880021065E-08	6.48922765114277E-09
505390	4156090	295.584014892578	1.01798615767084E-05	1.72645917695196E-07	3.17203341738823E-06	1.25422399004567E-06	1.01841567945212E-08	3.85912333809737E-10	2.10740221551297E-08	5.88362151950837E-09
505590	4156090	276.294006347656	1.04185357566108E-05	1.76181772650576E-07	3.2175697664686E-06	1.27290175196577E-06	9.20015020855895E-09	3.49352312042844E-10	1.90370251508485E-08	5.31546075805039E-09
505790	4156090	284.266998291016	1.04760353354685E-05	1.76775291994779E-07	3.2261882694758E-06	1.27638204923928E-06	8.28254227470018E-09	3.15216200868462E-10	1.71375277116496E-08	4.78561920529428E-09
505990	4156090	295.040985107422	1.03405422181543E-05	1.74243450054051E-07	3.1959561929436E-06	1.26385073458256E-06	7.43167751001477E-09	2.83518711475538E-10	1.5376243376931E-08	4.29429728143022E-09
506190	4156090	281.498992919922	1.00229029347039E-05	1.68764930206815E-07	3.12866141634909E-06	1.23606707243926E-06	6.64689815964232E-09	2.54238141871569E-10	1.37518089973385E-08	3.84111680628091E-09
506390	4156090	281.194000244141	9.55361557390138E-06	1.60831949818774E-07	3.02932959746705E-06	1.19515876011924E-06	5.92670795780587E-09	2.27322265815059E-10	1.22611241358904E-08	3.42521551645046E-09
506590	4156090	298.613006591797	8.9739216601714E-06	1.51108439272773E-07	2.90483383487753E-06	1.14402970220615E-06	5.26893017811967E-09	2.02694021429651E-10	1.08996786242395E-08	3.0453382877121E-09
506790	4156090	290.876007080078	8.32617533432924E-06	1.40276739278302E-07	2.76238771377429E-06	1.08571837628217E-06	4.6708560100629E-09	1.80256858679707E-10	9.66186006012056E-09	2.69992277644408E-09
506990	4156090	281.903015136719	7.64733228184068E-06	1.28933729847794E-07	2.60850908478792E-06	1.02295761694056E-06	4.12938045495864E-09	1.59899648080478E-10	8.5412354242593E-09	2.38717786135552E-09
507190	4156090	277.153991699219	6.96624703066104E-06	1.17547378710202E-07	2.44856388709481E-06	9.57982275997345E-07	3.64112393530809E-09	1.4150103278004E-10	7.53080311677911E-09	2.10515381570206E-09
507390	4156090	270.153015136719	6.30361203617088E-06	1.06455304664067E-07	2.28671659371622E-06	8.92510430863021E-07	3.20253877949148E-09	1.24933325468202E-10	6.62321357038973E-09	1.8518037948533E-09
507590	4156090	266.627014160156	5.67315401189389E-06	9.58834430993083E-08	2.12607852975517E-06	8.27808826168729E-07	2.81000034271862E-09	1.10065792150127E-10	5.81095806669284E-09	1.62503642386657E-09
507790	4156090	258.713012695312	5.08316971720247E-06	8.59702589712327E-08	1.96891434855732E-06	7.64782841889859E-07	2.45988320172632E-09	9.67674181610093E-11	5.0865265989547E-09	1.42275977924435E-09
507990	4156090	249.686004638672	4.5379572797493E-06	7.67894329383212E-08	1.81683810360257E-06	7.04061731761357E-07	2.14862324323636E-09	8.49091692468674E-11	4.44253649553243E-09	1.24291722981694E-09
508190	4156090	244.677001953125	4.0389902753349E-06	6.83685559213402E-08	1.67097458377781E-06	6.46068778492198E-07	1.87276677738633E-09	7.43658034623837E-11	3.87183413720147E-09	1.08351579773402E-09
508390	4156090	238.873992919922	3.58582008151379E-06	6.07035618476959E-08	1.5320829620257E-06	5.91075128834819E-07	1.62900794905742E-09	6.50172081881273E-11	3.36757246690197E-09	9.42647737776515E-10
508590	4156090	232.651000976562	3.17674368683719E-06	5.3769463146982E-08	1.40064805025545E-06	5.39239578832237E-07	1.41421588206499E-09	5.67493960154888E-11	2.92326719778552E-09	8.18506205443578E-10
508790	4156090	222.875	2.80928576147712E-06	4.75281460206525E-08	1.27694646724553E-06	4.90637429071499E-07	1.2254529873524E-09	4.94552324328458E-11	2.53283467043849E-09	7.093958515473E-10
508990	4156090	224.602005004883	2.4805399406752E-06	4.19339238462789E-08	1.16109451343694E-06	4.4528130725806E-07	1.05998575970764E-09	4.30348391613853E-11	2.19061419053662E-09	6.13739054426086E-10
509190	4156090	223.876998901367	2.18740599233326E-06	3.69374272941511E-08	1.05308323200089E-06	4.03136304656366E-07	9.15289382800211E-10	3.73957772202795E-11	1.89137753434077E-09	5.30078580379102E-10
509390	4156090	216.744003295898	1.92675116222879E-06	3.24882782751114E-08	9.52804740662565E-07	3.64131185705714E-07	7.89047335615206E-10	3.24530523516409E-11	1.63032809676504E-09	4.57077361263756E-10
509590	4156090	213.822998046875	1.69551690675198E-06	2.853688429961E-08	8.6007271029548E-07	3.28166923517025E-07	6.79147068668833E-10	2.81289815094889E-11	1.40309189516573E-09	3.93516005801754E-10
509790	4156090	205.332992553711	1.49078665910245E-06	2.50356019442946E-08	7.74638917517713E-07	2.95123415512819E-07	5.83672684354852E-10	2.43529476242703E-11	1.20570237119557E-09	3.38288580734039E-10
509990	4156090	179.636001586914	1.30982605922387E-06	2.19394522971509E-08	6.96207100634057E-07	2.64864939637949E-07	5.00895433632429E-10	2.1061077698907E-11	1.03458066803864E-09	2.90397133300357E-10
510190	4156090	158.634002685547	1.15010394265144E-06	1.92065201819765E-08	6.24444862119899E-07	2.37244703543872E-07	4.29262702445639E-10	1.81958481203236E-11	8.86512799255116E-10	2.48945334238528E-10
510390	4156090	153.968994140625	1.00930007938299E-06	1.6798134278528E-08	5.58994041531121E-07	2.12108701785675E-07	3.6738607611695E-10	1.57056690729578E-11	7.58624897112773E-10	2.13131595083094E-10
510590	4156090	154.341995239258	8.85303970409552E-07	1.46788976040817E-08	4.99479790431501E-07	1.89299009019375E-07	3.14028938677563E-10	1.3544459040198E-11	6.48357492093675E-10	1.82241920731304E-10
510790	4156090	130.080001831055	7.76207783595582E-07	1.28166167457628E-08	4.45518470345097E-07	1.68656583813006E-07	2.68093964047691E-10	1.16711996026988E-11	5.53439586433976E-10	1.55642692801234E-10
510990	4156090	109.871002197266	6.80295623441113E-07	1.11821662478875E-08	3.96724444787924E-07	1.50023631998278E-07	2.28610794229336E-10	1.00494968282975E-11	4.71863117052676E-10	1.32773561306794E-10
511190	4156090	105.692001342773	5.96030684559085E-07	9.74931299514609E-09	3.52715816204359E-07	1.33245563792777E-07	1.94724120185548E-10	8.64715756353833E-12	4.01858253963995E-10	1.13140569297688E-10
511390	4156090	94.181999206543	5.22041374355373E-07	8.49451841986006E-09	3.13119162726285E-07	1.18172575911008E-07	1.65682320112994E-10	7.43578451112915E-12	3.41869856222727E-10	9.63095988977279E-11
511590	4156090	94.572998046875	4.57107154398257E-07	7.39673115654155E-09	2.77573339474404E-07	1.04660890087177E-07	1.40826761931041E-10	6.39039510909376E-12	2.90535305302655E-10	8.19002008616108E-11
511790	4156090	84.6500015258789	4.00144606995213E-07	6.43717830148176E-09	2.45732419609915E-07	9.25736803582782E-08	1.19581831897583E-10	5.48906004250063E-12	2.46663850618638E-10	6.95798403845273E-11
511990	4156090	78.1210021972656	3.50194059469634E-07	5.59916191439946E-09	2.17267860328659E-07	8.1781724085154E-08	1.01445731764789E-10	4.71257774993611E-12	2.09217539981603E-10	5.90585905280139E-11
512190	4156090	79.1370010375977	3.06406972805465E-07	4.86786374786037E-09	1.91869985408714E-07	7.21638116678657E-08	8.5982042558726E-11	4.04416897550941E-12	1.7729374572368E-10	5.00842643979327E-11
512390	4156090	65.4820022583008	2.68034211456367E-07	4.23016066735311E-09	1.69248875542621E-07	6.36069494415251E-08	7.28120480585935E-11	3.46919744647835E-12	1.50109266048174E-10	4.24379851083944E-11
512590	4156090	47.1500015258789	2.34415249061791E-07	3.67445263745335E-09	1.49134760667962E-07	5.60063909394144E-08	6.16077952280296E-11	2.97491966803015E-12	1.269859525469E-10	3.59301826931205E-11
512790	4156090	22.7479991912842	2.04968319821552E-07	3.19050388715803E-09	1.31278002008865E-07	4.92655285581337E-08	5.20858540996478E-11	2.55026106386508E-12	1.07337786226947E-10	3.03969952917917E-11
512990	4156090	16.8509998321533	1.79181494107591E-07	2.76929666567055E-09	1.15448741893093E-07	4.32956734110514E-08	4.40017317493478E-11	2.18561098166432E-12	9.06593115840788E-11	2.56970450762766E-11
513190	4156090	NaN	1.56604638430699E-07	2.40289794057966E-09	1.01436296063805E-07	3.80157505523461E-08	3.71448978807761E-11	1.87264130133455E-12	7.65153372388737E-11	2.17085680870387E-11
513390	4156090	NaN	1.36842206353037E-07	2.08433828331417E-09	8.9048351329276E-08	3.33519317620459E-08	3.13343725443402E-11	1.60414530372151E-12	6.45318014256911E-11	1.83268684963636E-11
513590	4156090	NaN	1.19546800647539E-07	1.80750241321518E-09	7.81100253070371E-08	2.92372260320186E-08	2.64148260092036E-11	1.37389389537976E-12	5.43876977809853E-11	1.54620673811128E-11
513790	4156090	NaN	1.0441344372449E-07	1.56703068144183E-09	6.84628354630138E-08	2.56110443243404E-08	2.22531443012192E-11	1.17650757516779E-12	4.58079666522978E-11	1.30371196330766E-11
513990	4156090	NaN	9.117449296493E-08	1.35823094301369E-09	5.99636157740407E-08	2.24187520801238E-08	1.87354172144438E-11	1.00734665031589E-12	3.85572614048862E-11	1.09860767940762E-11
514190	4156090	NaN	7.9595137776871E-08	1.17699947878612E-09	5.24834110835972E-08	1.96112194740538E-08	1.57643014686964E-11	8.62413900223004E-13	3.24344912012017E-11	9.2525653719841E-12
514390	4156090	NaN	6.94694214991392E-08	1.01975054096108E-09	4.59063763366452E-08	1.71443789527939E-08	1.32567195289132E-11	7.38268577635606E-13	2.72680593990055E-11	7.7884583361354E-12
514590	4156090	NaN	6.06167318223066E-08	8.83353622217901E-10	4.01286992141814E-08	1.49787961662226E-08	1.11418561024694E-11	6.31950443554467E-13	2.29117181741805E-11	6.55271773663383E-12
514790	4156090	NaN	5.28787093200337E-08	7.65077917461604E-10	3.50575612612797E-08	1.30792593998863E-08	9.35941960340659E-12	5.40914391889791E-13	1.92409723305853E-11	5.51039104179353E-12
482590	4156290	166.171997070312	4.79134736372349E-11	9.4705005561132E-12	2.68439589785872E-11	1.57449884502974E-11	1.68308005410948E-13	4.1228971527241E-14	2.90295027514722E-13	1.07430995151671E-13
482790	4156290	171.77799987793	5.39423826993463E-11	1.05657343025243E-11	3.06985201345514E-11	1.7836354682906E-11	1.99476125173059E-13	4.73325011897794E-14	3.46741640842249E-13	1.26914885182703E-13
482990	4156290	182.84700012207	6.07100544515759E-11	1.1781750337702E-11	3.50985324405269E-11	2.02017628530709E-11	2.3644624082073E-13	5.43236577867027E-14	4.14091806700429E-13	1.49948339697595E-13
483190	4156290	193.414993286133	6.83038596869122E-11	1.3131014270832E-11	4.01200204415245E-11	2.28766107697443E-11	2.80300031384051E-13	6.23296124186852E-14	4.9443475029965E-13	1.77179967240503E-13
483390	4156290	194.979995727539	7.68210739727447E-11	1.46271582561982E-11	4.58494459143849E-11	2.59008069970718E-11	3.32320275745571E-13	7.14956067944204E-14	5.90255997728261E-13	2.09376963235563E-13
483590	4156290	205.819000244141	8.63699596298379E-11	1.62850740390024E-11	5.23851199371534E-11	2.9319339633617E-11	3.94027954988997E-13	8.19874992986449E-14	7.04511586372763E-13	2.47446700800331E-13
483790	4156290	221.604995727539	9.70709605070783E-11	1.81210079489256E-11	5.98388036302594E-11	3.31829143740372E-11	4.67226109086896E-13	9.39946921511135E-14	8.40715945946194E-13	2.92462234295762E-13
483990	4156290	240.947006225586	1.09058033534424E-10	2.0152669491401E-11	6.83375224364401E-11	3.75486782797788E-11	5.54051656000883E-13	1.07733478603168E-13	1.00304590878463E-12	3.45692397574119E-13
484190	4156290	227.955001831055	1.22480124606673E-10	2.2399342788895E-11	7.80256217921919E-11	4.24810324198542E-11	6.57036587518528E-13	1.2345087146331E-13	1.19646374095413E-12	4.08637310337654E-13
484390	4156290	261.718994140625	1.37502808153548E-10	2.48820035677743E-11	8.90670959084125E-11	4.80525465447432E-11	7.79180222102234E-13	1.41429011453043E-13	1.42686258812417E-12	4.83070266864969E-13
484590	4156290	273.322998046875	1.54310114390511E-10	2.76234470357432E-11	1.01648225507351E-10	5.43449921427741E-11	9.24034460277379E-13	1.61990242545803E-13	1.70123831425707E-12	5.71087128242617E-13
484790	4156290	264.997985839844	1.73106592926067E-10	3.06484031318167E-11	1.15980683245638E-10	6.14505360616685E-11	1.09580412053348E-12	1.855026965164E-13	2.02789238498306E-12	6.75164338361486E-13
484990	4156290	238.363006591797	1.94119568717235E-10	3.39836757507108E-11	1.32304875402834E-10	6.94730346707227E-11	1.29946533647167E-12	2.12386913103936E-13	2.41667127684648E-12	7.98227406938517E-13
485190	4156290	212.164001464844	2.17601640393006E-10	3.76582950529298E-11	1.50893655661697E-10	7.85294705744352E-11	1.54090503907351E-12	2.43123534003649E-13	2.87924887977507E-12	9.43731606253267E-13
485390	4156290	187.445999145508	2.43833540308226E-10	4.17036537538602E-11	1.72056737006819E-10	8.87516308103903E-11	1.82708478793429E-12	2.78261716566347E-13	3.42945876380326E-12	1.11575644729318E-12
485590	4156290	166.70100402832	2.73127305645066E-10	4.615364483023E-11	1.9614560080041E-10	1.00287965232091E-10	2.16623336716366E-12	3.18428749922437E-13	4.08368554489033E-12	1.31911674398779E-12
485790	4156290	155.425003051758	3.05829872235054E-10	5.10448637655821E-11	2.23559072400301E-10	1.1330572657104E-10	2.5680736563879E-12	3.64341878679424E-13	4.86132573590625E-12	1.55949376390931E-12
485990	4156290	154.156997680664	3.42327086953925E-10	5.64167700737216E-11	2.54749602033974E-10	1.27993338730083E-10	3.04408839899555E-12	4.16821123663635E-13	5.78532884427056E-12	1.84358843580577E-12
486190	4156290	140.539001464844	3.83048241062634E-10	6.23118679592841E-11	2.9023038310809E-10	1.4456307930652E-10	3.60783197675989E-12	4.7680410869519E-13	6.88283281186475E-12	2.17930110095719E-12
486390	4156290	121.629997253418	4.2847116995893E-10	6.87758991147073E-11	3.30583373935236E-10	1.63254095649071E-10	4.27529576920399E-12	5.45363095188168E-13	8.18590943987221E-12	2.57594211338074E-12
486590	4156290	125.318000793457	4.79128017724949E-10	7.58580474436074E-11	3.76468358865037E-10	1.84335803349654E-10	5.06533585233254E-12	6.23724503815926E-13	9.73243790553842E-12	3.04447830568825E-12
486790	4156290	71.4869995117188	5.356115833018E-10	8.36111512240818E-11	4.28632641328326E-10	2.08111517336844E-10	6.00017310701319E-12	7.13291281134854E-13	1.15671272747938E-11	3.59782113846127E-12
486990	4156290	69.8359985351562	5.98582761535673E-10	9.20919820414884E-11	4.8792270125339E-10	2.34922834089113E-10	7.10597762295329E-12	8.15669191720585E-13	1.37427121498534E-11	4.25116374159051E-12
487190	4156290	68.6660003662109	6.68779141158192E-10	1.01361502456184E-10	5.55297891811177E-10	2.65154735616427E-10	8.413550207389E-12	9.32696289643131E-13	1.63213488352697E-11	5.02237357613088E-12
487390	4156290	67.9509963989258	7.47024331522807E-10	1.1148491584669E-10	6.31844650751985E-10	2.99240745857609E-10	9.95911522868191E-12	1.06647288269732E-12	1.93762433162483E-11	5.93244705878952E-12
487590	4156290	68.3290023803711	8.34238824116177E-10	1.22532226708297E-10	7.18792986034345E-10	3.37669234057848E-10	1.17852461812067E-11	1.21940415475901E-12	2.29935483897304E-11	7.00604500922329E-12
487790	4156290	67.8960037231445	9.31452230140867E-10	1.34578482707874E-10	8.17534986274636E-10	3.80990244474527E-10	1.39419390118453E-11	1.39424285719198E-12	2.7274569360581E-11	8.27211014460062E-12
487990	4156290	66.6800003051758	1.03981722500801E-09	1.47704125852133E-10	9.29645640536402E-10	4.29823228670595E-10	1.6487857952961E-11	1.59413943065638E-12	3.2338325571667E-11	9.76458459053926E-12
488190	4156290	70.0019989013672	1.16062540906585E-09	1.61995389359874E-10	1.05690621683874E-09	4.84865729709977E-10	1.94917787525258E-11	1.82269935483875E-12	3.83245201305602E-11	1.15232411742739E-11
488390	4156290	69.8410034179688	1.29532534534671E-09	1.77544740627181E-10	1.20133048578609E-09	5.46903121773869E-10	2.30342576546308E-11	2.08404857616697E-12	4.53969768421843E-11	1.35946448054058E-11
488590	4156290	86.4739990234375	1.44554305490392E-09	1.94451368763057E-10	1.36519409287915E-09	6.16819513678156E-10	2.72095576792763E-11	2.38290796467757E-12	5.37476102526921E-11	1.60332621563653E-11
488790	4156290	107.421997070312	1.61310532342889E-09	2.12821740863674E-10	1.55106743532237E-09	6.95609960066716E-10	3.21278678989607E-11	2.72467813423978E-12	6.3601002652904E-11	1.89027402468647E-11
488990	4156290	107.611000061035	1.80006617651686E-09	2.32770240803236E-10	1.76185239514379E-09	7.84394115956714E-10	3.79178547980616E-11	3.11553608022418E-12	7.52196692386314E-11	2.22773765775812E-11
489190	4156290	108.143997192383	2.0087369671439E-09	2.54419932902491E-10	2.0008233397238E-09	8.84431509991866E-10	4.47295893734969E-11	3.56254552689524E-12	8.89101013137852E-11	2.62438060890917E-11
489390	4156290	109.722999572754	2.24172034570432E-09	2.77903219724788E-10	2.27167279434638E-09	9.97138434527216E-10	5.27378927551584E-11	4.07377824306759E-12	1.05029685005401E-10	3.090292883295E-11
489590	4156290	111.422996520996	2.50194882396778E-09	3.03362714176785E-10	2.57856223623158E-09	1.12410681963371E-09	6.21461559807999E-11	4.65845329660858E-12	1.23994601314575E-10	3.63721115971048E-11
489790	4156290	113.634002685547	2.7927285233929E-09	3.30952398913251E-10	2.92617848419801E-09	1.26712530872711E-09	7.31906893692342E-11	5.32709721751777E-12	1.46288820818953E-10	4.27876957793467E-11
489990	4156290	117.30899810791	3.11778852270658E-09	3.60838907997027E-10	3.31979617907883E-09	1.42820260864792E-09	8.61456546048555E-11	6.09172398512285E-12	1.72474312975676E-10	5.03078425866839E-11
490190	4156290	128.205001831055	3.48133641873545E-09	3.93202658771599E-10	3.76534682417917E-09	1.60959310918256E-09	1.01328637907535E-10	6.96603061135863E-12	2.03202593612801E-10	5.91157452961043E-11
490390	4156290	141.348007202148	3.88812090930967E-09	4.28239090585542E-10	4.26949491932789E-09	1.81382512873364E-09	1.19106927110736E-10	7.96561374281159E-12	2.392277382228E-10	6.94232464719481E-11
490590	4156290	153.544006347656	4.34350238753476E-09	4.66160951333377E-10	4.83972175385196E-09	2.04373259254163E-09	1.39904560978507E-10	9.10823006993536E-12	2.8142099040825E-10	8.14749112548023E-11
490790	4156290	151.794998168945	4.85353171152216E-09	5.07199593356609E-10	5.48441715489835E-09	2.30248894491466E-09	1.64210193725038E-10	1.04140633926898E-11	3.30787082809455E-10	9.55525606068315E-11
490990	4156290	156.634994506836	5.42503862254956E-09	5.5160695679082E-10	6.21297987074604E-09	2.59364461510943E-09	1.92585834486383E-10	1.19060204352804E-11	3.88482383008501E-10	1.11980310638173E-10
491190	4156290	175.897003173828	6.06573061540026E-09	5.99658131032229E-10	7.03592694387986E-09	2.921168094731E-09	2.25676514451514E-10	1.3610069512097E-11	4.55834963043635E-10	1.31130154585266E-10
491390	4156290	181.697006225586	6.78430310072862E-09	6.51654118795188E-10	7.96501238000312E-09	3.28949049651046E-09	2.64220906199602E-10	1.55556090906407E-11	5.34366656684437E-10	1.5342809497102E-10
491590	4156290	199.804000854492	7.59056176594529E-09	7.0792453139768E-10	9.01335532206651E-09	3.70355349600938E-09	3.09062905056487E-10	1.77758581885114E-11	6.25817132681872E-10	1.7936082752075E-10
491790	4156290	220.307006835938	8.49555847604725E-09	7.68831023228709E-10	1.01955779174338E-08	4.168861241393E-09	3.61164171346296E-10	2.03082865773649E-11	7.32169965945114E-10	2.0948298524198E-10
491990	4156290	239.850006103516	9.51174122999411E-09	8.3477042695972E-10	1.15279527837785E-08	4.69153553215092E-09	4.2161757484252E-10	2.31950604578914E-11	8.55680617117854E-10	2.44424900998733E-10
492190	4156290	253.322998046875	1.06531197064283E-08	9.06178177744912E-10	1.30285597842213E-08	5.27837453895801E-09	4.91661469840053E-10	2.64835125699474E-11	9.98906145508036E-10	2.84900848650145E-10
492390	4156290	270.638000488281	1.19354475752691E-08	9.83532967331071E-10	1.47174516537407E-08	5.93691550194483E-09	5.72694667813557E-10	3.0226653139226E-11	1.16473637542686E-09	3.31717700411987E-10
492590	4156290	266.442993164062	1.3376422161199E-08	1.06736091549403E-09	1.6616827533101E-08	6.6754999702348E-09	6.66291891838529E-10	3.44836723098707E-11	1.35642609677978E-09	3.85783852800059E-10
492790	4156290	253.449996948242	1.49959023266452E-08	1.15823897318694E-09	1.87512131479767E-08	7.50334094449553E-09	7.74219430464674E-10	3.93204178677333E-11	1.57762772215637E-09	4.48118255728111E-10
492990	4156290	288.588012695312	1.68161463906585E-08	1.25680075347693E-09	2.11476460954148E-08	8.4305934144607E-09	8.98450649792367E-10	4.48099164739272E-11	1.83242363788571E-09	5.19859392247403E-10
493190	4156290	292.420989990234	1.88620711552586E-08	1.36374329203256E-09	2.38358638959768E-08	9.46842648741713E-09	1.04118089619022E-09	5.10328840875694E-11	2.12535725151248E-09	6.02273903937732E-10
493390	4156290	297.558013916016	2.11615320909577E-08	1.4798313777666E-09	2.68484931073535E-08	1.06290943415787E-08	1.20484110577443E-09	5.80781196833564E-11	2.46146148579133E-09	6.96764452008537E-10
493590	4156290	285.93798828125	2.37456241172221E-08	1.60590284242182E-09	3.02212345485233E-08	1.1926006388987E-08	1.39210938266057E-09	6.60428318925391E-11	2.84628317114499E-09	8.04876439200322E-10
493790	4156290	280.716003417969	2.66490007122186E-08	1.74287428290027E-09	3.39930359165972E-08	1.33737931668055E-08	1.60591977892056E-09	7.50328804329146E-11	3.28590147602419E-09	9.2830308474627E-10
493990	4156290	276.890991210938	2.99102178502807E-08	1.89174640953076E-09	3.82062543813576E-08	1.49883683725338E-08	1.8494671716061E-09	8.51628941719746E-11	3.78693820506871E-09	1.06888824769071E-09
494190	4156290	285.976013183594	3.35721037290469E-08	2.05361001585781E-09	4.2906803061941E-08	1.67869854823256E-08	2.12620687032338E-09	9.6556182829375E-11	4.3565573566486E-09	1.22862624444304E-09
494390	4156290	284.851013183594	3.76821534084371E-08	2.22965214882292E-09	4.81442717212099E-08	1.87882851973387E-08	2.43984768163594E-09	1.09344400983896E-10	5.00245104089906E-09	1.40965785986417E-09
494590	4156290	295.10400390625	4.22929395176087E-08	2.42116136612716E-09	5.39720094221809E-08	2.1012328585412E-08	2.79433682825252E-09	1.23666939781422E-10	5.73280849592551E-09	1.6142616668972E-09
494790	4156290	299.975006103516	4.74625476848116E-08	2.62953299250825E-09	6.04471664688609E-08	2.34806155362045E-08	3.19383501000788E-09	1.39669983070836E-10	6.55626464362982E-09	1.84483966262565E-09
494990	4156290	295.673004150391	5.32550340054389E-08	2.85627113192978E-09	6.76306840141955E-08	2.62160822636098E-08	3.64267974539734E-09	1.57505076252549E-10	7.48182439532303E-09	2.10389610220885E-09
495190	4156290	288.957000732422	5.97409064253995E-08	3.10299294356861E-09	7.55872216239811E-08	2.92430778803752E-08	4.14533519354804E-09	1.77327296151882E-10	8.51875883581835E-09	2.39400856683213E-09
495390	4156290	277.966003417969	6.69976313728988E-08	3.3714325177832E-09	8.43850120971652E-08	3.25873144806363E-08	4.70632662954024E-09	1.99292900201747E-10	9.67646944013945E-09	2.71779015427134E-09
495590	4156290	269.725006103516	7.51101655072309E-08	3.66344150938765E-09	9.40956331210741E-08	3.62757851519103E-08	5.33015772918848E-09	2.23556314305776E-10	1.09643167474055E-08	3.0778417386367E-09
495790	4156290	252.910995483398	8.41715193915493E-08	3.980989923188E-09	1.04793686140104E-07	4.03366486210544E-08	6.02120930157957E-09	2.50266494083344E-10	1.2391410454007E-08	3.4766935175179E-09
495990	4156290	269.77099609375	9.4283356583367E-08	4.32616408362971E-09	1.16556373938909E-07	4.47990755688958E-08	6.78361839688522E-09	2.79562603959033E-10	1.39663587346633E-08	3.91673522339464E-09
496190	4156290	272.618988037109	1.05556639208402E-07	4.70116647938337E-09	1.29462971309226E-07	4.96930575872583E-08	7.62113742021386E-09	3.11569100701406E-10	1.56969758688379E-08	4.40013481779193E-09
496390	4156290	272.742004394531	1.18112343802424E-07	5.10831310736171E-09	1.43594189109011E-07	5.50491760884905E-08	8.53697334491902E-09	3.46389965838287E-10	1.75899487616436E-08	4.92874563697142E-09
496590	4156290	267.389007568359	1.32082242419489E-07	5.5500251827637E-09	1.59031425036083E-07	6.08983267535567E-08	9.53360841510425E-09	3.84102184151296E-10	1.96504651637264E-08	5.50400280582208E-09
496790	4156290	259.945007324219	1.47609756416404E-07	6.02882181051125E-09	1.75855900072257E-07	6.72714033666455E-08	1.06126051857556E-08	4.24748865817752E-10	2.18818090370532E-08	6.12681065946807E-09
496990	4156290	249.682006835938	1.64850973289848E-07	6.54732168867273E-09	1.94147720363881E-07	7.41989605467249E-08	1.17743999920413E-08	4.68332255679542E-10	2.42849314001971E-08	6.79742356599831E-09
497190	4156290	255.085006713867	1.83975887440063E-07	7.10824160677475E-09	2.13984897326578E-07	8.17108593657267E-08	1.3018089810888E-08	5.14806132312182E-10	2.68580079901427E-08	7.51532279759016E-09
497390	4156290	270.287994384766	2.05169816964628E-07	7.71439492534832E-09	2.35442318022885E-07	8.98358950278342E-08	1.4341220262875E-08	5.64068376466731E-10	2.95959990339509E-08	8.27909408672977E-09
497590	4156290	276.492004394531	2.28635127529283E-07	8.36869569295651E-09	2.58590741909806E-07	9.86014376771905E-08	1.57395836412958E-08	6.15953933199024E-10	3.24902297093239E-08	9.08631096942533E-09
497790	4156290	283.131011962891	2.54593336604747E-07	9.07417036312458E-09	2.83495882464256E-07	1.08033108692902E-07	1.72070375008494E-08	6.70228526164618E-10	3.55280131714652E-08	9.93342999236444E-09
497990	4156290	285.585998535156	2.83287679867487E-07	9.83397740297122E-09	3.10217647058918E-07	1.181545191213E-07	1.87353556575856E-08	7.26583543771534E-10	3.86923407397097E-08	1.08157046276954E-08
498190	4156290	301.558013916016	3.14986242853974E-07	1.06514387319827E-08	3.38809623232303E-07	1.28987104557916E-07	2.03141243151385E-08	7.84632546982023E-10	4.19616656310745E-08	1.17271252378686E-08
498390	4156290	303.191009521484	3.49985769826538E-07	1.15300890887101E-08	3.69318910533759E-07	1.40550096154896E-07	2.19306962868798E-08	8.43909899381465E-10	4.53098071293253E-08	1.26603926035634E-08
498590	4156290	307.445007324219	3.88616255542189E-07	1.24737429045692E-08	4.01786403800677E-07	1.52860665663275E-07	2.35702156796793E-08	9.03871888719785E-10	4.87060009036693E-08	1.36069321190841E-08
498790	4156290	307.859985351562	4.31246424945803E-07	1.34865771191782E-08	4.36247634581762E-07	1.65934281995488E-07	2.52157238440859E-08	9.63900518181741E-10	5.21151180430149E-08	1.45569547827415E-08
498990	4156290	303.707000732422	4.78290183604026E-07	1.45732480424142E-08	4.72734270834314E-07	1.79785327014956E-07	2.68483551102587E-08	1.02331083648451E-09	5.54980701173455E-08	1.5499570221002E-08
499190	4156290	308.811004638672	5.30218477946304E-07	1.57391089177219E-08	5.11277665508147E-07	1.94428514745483E-07	2.84476268368144E-08	1.081361529005E-09	5.88124099595312E-08	1.64229541181704E-08
499390	4156290	316.093994140625	5.87642341111457E-07	1.69916580734027E-08	5.51934162717586E-07	2.09888945233061E-07	2.99918238258771E-08	1.13726880493201E-09	6.20131282857628E-08	1.73145701087233E-08
499590	4156290	332.302001953125	6.51240474700045E-07	1.83393320037797E-08	5.94764383163405E-07	2.26193861437499E-07	3.14584717772476E-08	1.1902234688738E-09	6.5053635031704E-08	1.81614430945796E-08
499790	4156290	347.513000488281	7.21848977200883E-07	1.97931177900751E-08	6.39857349356019E-07	2.43382382465944E-07	3.28248883512774E-08	1.23941067887369E-09	6.78869018581431E-08	1.89504773643569E-08
499990	4156290	336.528015136719	8.00442651944596E-07	2.13662614947851E-08	6.87329926070418E-07	2.61505115329575E-07	3.40687944279532E-08	1.28403166626042E-09	7.04667298423769E-08	1.9668809420149E-08
500190	4156290	357.256011962891	8.88128409091459E-07	2.30741769851914E-08	7.37327935282472E-07	2.80624498969245E-07	3.5168963158933E-08	1.3233271617713E-09	7.27490951748069E-08	2.03041827865591E-08
500390	4156290	369.756011962891	9.86046514490957E-07	2.49329337995403E-08	7.89998608749965E-07	3.00803901681743E-07	3.61058787001889E-08	1.35660091842496E-09	7.46935153614106E-08	2.08453283399377E-08
500590	4156290	370.446014404297	1.09549716892657E-06	2.69614683670179E-08	8.45529748084595E-07	3.22123160090479E-07	3.68623740843332E-08	1.38324240692611E-09	7.62643723793931E-08	2.12823325906628E-08
500790	4156290	381.283996582031	1.21806191780822E-06	2.9183699943849E-08	9.04186887859344E-07	3.44693336959171E-07	3.74242164219977E-08	1.40274764463518E-09	7.74321266723524E-08	2.16069755864547E-08
500990	4156290	390.322998046875	1.35554512254384E-06	3.16276283251301E-08	9.66297353986303E-07	3.68650394738776E-07	3.77806084983769E-08	1.41473707237329E-09	7.81743578260748E-08	2.18130205898172E-08
501190	4156290	383.536987304688	1.50991051636808E-06	3.43242741626027E-08	1.03223616386092E-06	3.94149432564975E-07	3.79245790202287E-08	1.41896926643149E-09	7.84765745410399E-08	2.18964393898082E-08
501390	4156290	362.75	1.68304716707504E-06	3.73036244669642E-08	1.10236933152003E-06	4.21341644170987E-07	3.78532395528153E-08	1.41535007746472E-09	7.83327479461245E-08	2.18555607361822E-08
501590	4156290	347.389007568359	1.8773173128936E-06	4.0604063476343E-08	1.17717467088617E-06	4.5042392377769E-07	3.7567892828477E-08	1.40393623432955E-09	7.77455373001808E-08	2.1691132963808E-08
501790	4156290	348.847991943359	2.09569875213897E-06	4.42743321793152E-08	1.2572437451702E-06	4.81640824492707E-07	3.70739864822983E-08	1.38493354289719E-09	7.67261947357676E-08	2.14062973564789E-08
501990	4156290	345.614013671875	2.34118047608223E-06	4.83638608904565E-08	1.34318010222546E-06	5.1524166806944E-07	3.63809146417989E-08	1.35868959183182E-09	7.52941545565456E-08	2.10064736500459E-08
502190	4156290	337.101989746094	2.6169507114271E-06	5.29256262979838E-08	1.435615477556E-06	5.51488218402727E-07	3.55016788896952E-08	1.32568147574899E-09	7.34763309113538E-08	2.04991643804753E-08
502390	4156290	332.316986083984	2.92639650179724E-06	5.80159786127993E-08	1.53519392862558E-06	5.90648849582856E-07	3.44524279867152E-08	1.28649926792594E-09	7.1306163964171E-08	1.98936892758058E-08
502590	4156290	332.964996337891	3.27306341896646E-06	6.36937809284894E-08	1.64254624941356E-06	6.32988768156936E-07	3.3251901777334E-08	1.24182563191596E-09	6.88224676235098E-08	1.92008640788908E-08
502790	4156290	329.011993408203	3.66060636528401E-06	7.00193185320553E-08	1.75825892074344E-06	6.78758117400853E-07	3.19208096090919E-08	1.19241379612796E-09	6.60681409573586E-08	1.84326419439483E-08
502990	4156290	321.696014404297	4.09277119133088E-06	7.70529611037148E-08	1.88283824025539E-06	7.28178184861711E-07	3.04811746015132E-08	1.13906382461956E-09	6.30888090665928E-08	1.76017348360444E-08
503190	4156290	320.622009277344	4.57313003782603E-06	8.48524051635229E-08	2.01665899734571E-06	7.81421126973059E-07	2.8955675706495E-08	1.0825991392762E-09	5.99314588788854E-08	1.67212337654618E-08
503390	4156290	314.339996337891	5.10283126719421E-06	9.34361386353907E-08	2.1595909921734E-06	8.38451881962731E-07	2.73670161933009E-08	1.02384369881983E-09	5.66431301730868E-08	1.58042441812843E-08
503590	4156290	320.938995361328	5.68227261176926E-06	1.02808598647316E-07	2.31121411518246E-06	8.99121845616489E-07	2.57373439635367E-08	9.63601161784963E-10	5.32697138205007E-08	1.48635513138157E-08
503790	4156290	326.095001220703	6.31101722312479E-06	1.12959089095262E-07	2.47078728746365E-06	9.63156976624014E-07	2.40877433937549E-08	9.02636626029795E-10	4.98548982714615E-08	1.39113268038533E-08
503990	4156290	325.296997070312	6.9865637898887E-06	1.23842060437841E-07	2.63704690302028E-06	1.03007247883119E-06	2.24378125798923E-08	8.41661434598745E-10	4.64392930722673E-08	1.2958884627862E-08
504190	4156290	330.132995605469	7.70355355573325E-06	1.35364444943867E-07	2.80808336416E-06	1.09912016467076E-06	2.08053338264695E-08	7.81321328263709E-10	4.30597456799258E-08	1.20164908478312E-08
504390	4156290	324.335998535156	8.45270741769758E-06	1.4736879748207E-07	2.98119296025111E-06	1.16922424033588E-06	1.92060395178341E-08	7.22188021010819E-10	3.97488560109879E-08	1.1093228420716E-08
504590	4156290	324.321014404297	9.21937353830084E-06	1.59610749765544E-07	3.15269503306495E-06	1.23890093037119E-06	1.76534704944647E-08	6.64754097021446E-10	3.65346827608791E-08	1.01969154081961E-08
504790	4156290	305.214996337891	9.98165971250495E-06	1.71729716705325E-07	3.31770712461917E-06	1.30615862791766E-06	1.61589200437929E-08	6.0943107828858E-10	3.34406270795521E-08	9.3340726455722E-09
504990	4156290	306.510009765625	1.07082101934647E-05	1.83214732124442E-07	3.46989604831765E-06	1.36838624287093E-06	1.47314532519766E-08	5.56549941931357E-10	3.04854728332702E-08	8.50993482078257E-09
505190	4156290	315.889007568359	1.13562619301981E-05	1.93376422314368E-07	3.60130507968666E-06	1.42227293193301E-06	1.33779900271922E-08	5.06364000195716E-10	2.76835587400417E-08	7.72849833264768E-09
505390	4156290	318.872009277344	1.18721108757567E-05	2.01355233173177E-07	3.70253386626025E-06	1.46387824773478E-06	1.21034389900371E-08	4.59053825774137E-10	2.50450556882544E-08	6.99259860259677E-09
505590	4156290	298.316009521484	1.21971595621835E-05	2.06218465062169E-07	3.76375661422017E-06	1.48906147101963E-06	1.09108690909084E-08	4.14733509682951E-10	2.25763222842403E-08	6.30400915354173E-09
505790	4156290	297.957000732422	1.22820915387358E-05	2.07186410466002E-07	3.77694585547704E-06	1.49442839285742E-06	9.80170646971747E-09	3.73457622752299E-10	2.02803130058956E-08	5.66355518494074E-09
505990	4156290	295.489013671875	1.21055773433815E-05	2.03927523949007E-07	3.73871709438851E-06	1.47854621502026E-06	8.77594558597009E-09	3.35228794509518E-10	1.81570157985131E-08	5.07123542526484E-09
506190	4156290	305.847991943359	1.16852073473925E-05	1.96729730832461E-07	3.65195361544636E-06	1.44263921466934E-06	7.83236483377444E-09	3.00005460176728E-10	1.62038989602675E-08	4.52634657655866E-09
506390	4156290	300.610992431641	1.1070948726987E-05	1.86396654787097E-07	3.52477752140189E-06	1.39015120884918E-06	6.96873860291315E-09	2.67709486358078E-10	1.44163506516639E-08	4.02760570980712E-09
506590	4156290	306.377990722656	1.03266041480154E-05	1.73952971626422E-07	3.36768179868138E-06	1.3255225882652E-06	6.18203945885012E-09	2.38233448091505E-10	1.27880979126474E-08	3.57326695864077E-09
506790	4156290	297.036987304688	9.51256937891078E-06	1.60370276367535E-07	3.19085079466486E-06	1.25304843552116E-06	5.46862576579419E-09	2.11447400191173E-10	1.13115954889E-08	3.16122981875835E-09
506990	4156290	294.868011474609	8.67699477328189E-06	1.46426047615082E-07	3.00275251218218E-06	1.17628053899075E-06	4.82441156751594E-09	1.87204977152381E-10	9.9783779048458E-09	2.7891371874318E-09
507190	4156290	287.56298828125	7.85418743948467E-06	1.32677457935728E-07	2.80983486536341E-06	1.09790107976568E-06	4.24501691852256E-09	1.65348831567418E-10	8.77937097770959E-09	2.4544621391074E-09
507390	4156290	285.066009521484	7.06655976865265E-06	1.19491640274359E-07	2.61677095200656E-06	1.01983046707454E-06	3.72589792263179E-09	1.45715356315595E-10	7.70516125661364E-09	2.15458299403068E-09
507590	4156290	285.539001464844	6.32749660840723E-06	1.07090804442304E-07	2.42685528225893E-06	9.43399123864908E-07	3.26245662250729E-09	1.28138656158656E-10	6.74622371772265E-09	1.886846742607E-09
507790	4156290	276.549011230469	5.64397345630443E-06	9.55936519746463E-08	2.24237153237157E-06	8.69506633114133E-07	2.85013160098979E-09	1.12453839383476E-10	5.89310946905483E-09	1.64862134339356E-09
507990	4156290	265.334991455078	5.01860322229478E-06	8.5047900155359E-08	2.06488012718365E-06	7.98746278258833E-07	2.48447062473029E-09	9.84996749766134E-11	5.13659622587398E-09	1.43733766181023E-09
508190	4156290	268.248992919922	4.45113000741821E-06	7.5454133848698E-08	1.89542645304503E-06	7.31495406867064E-07	2.16118697489539E-09	8.61206573966268E-11	4.46780498162422E-09	1.25052199060599E-09
508390	4156290	269.216003417969	3.93948275293073E-06	6.67827177292025E-08	1.73468585820688E-06	6.67978553853906E-07	1.87620126796932E-09	7.5168490316389E-11	3.8782866562154E-09	1.08582016539416E-09
508590	4156290	247.188995361328	3.48050421746264E-06	5.89855707714006E-08	1.58306275943364E-06	6.08310723853594E-07	1.62567073876848E-09	6.55032174045355E-11	3.36008267975218E-09	9.41014494615182E-10
508790	4156290	252.753997802734	3.07044826755739E-06	5.20042541855167E-08	1.44075812832698E-06	5.52526909561944E-07	1.40600780465821E-09	5.69939387112653E-11	2.90576338979388E-09	8.14034489335917E-10
508990	4156290	257.259002685547	2.70531430461055E-06	4.57754555079274E-08	1.30781599332838E-06	5.00602375073122E-07	1.21388969312211E-09	4.95191772157413E-11	2.5084479343503E-09	7.02962421461822E-10
509190	4156290	250.830001831055	2.38106805168162E-06	4.02346484248848E-08	1.18415644739424E-06	4.52466904563746E-07	1.04626080216857E-09	4.2966988192701E-11	2.1618091137819E-09	6.06034690747101E-10
509390	4156290	245.714004516602	2.09378342707253E-06	3.53184801315399E-08	1.06960020596401E-06	4.08015188923845E-07	9.00329292447595E-10	3.72348628542412E-11	1.86006627138024E-09	5.21639864782235E-10
509590	4156290	236.041000366211	1.83972988409845E-06	3.09662750160502E-08	9.63887960317248E-07	3.67114769571397E-07	7.7355923355247E-10	3.22294719163755E-11	1.59796897453154E-09	4.48314154115403E-10
509790	4156290	227.332992553711	1.61542230738808E-06	2.7120928299338E-08	8.66696504881143E-07	3.29612428185163E-07	6.63659453033026E-10	2.78662915490547E-11	1.3707738652217E-09	3.84734985820186E-10
509990	4156290	211.731002807617	1.41764543878279E-06	2.37293810304307E-08	7.7765276176112E-07	2.95339549985808E-07	5.68570052750722E-10	2.40691283619168E-11	1.17421669717987E-09	3.29713223809716E-10
510190	4156290	191.595001220703	1.24346121594243E-06	2.07428119676724E-08	6.96346280737214E-07	2.64116755863241E-07	4.86447419586771E-10	2.07695904462399E-11	1.00448125613023E-09	2.82184521252979E-10
510390	4156290	178.992004394531	1.09020488352113E-06	1.81166409609163E-08	6.22340466314228E-07	2.35757954646783E-07	4.15648406072786E-10	1.79065434489642E-11	8.58166547964239E-10	2.41200201720578E-10
510590	4156290	166.048004150391	9.55473964309228E-07	1.58104095097902E-08	5.551826156751E-07	2.10073887793737E-07	3.54714198974057E-10	1.54255467998746E-11	7.32253351508815E-10	2.05917956900624E-10
510790	4156290	144.167999267578	8.37112928262921E-07	1.37875836790845E-08	4.94412771936788E-07	1.86875196999437E-07	3.02354292653151E-10	1.32782806670373E-11	6.24071004283113E-10	1.75592599416183E-10
510990	4156290	134.714004516602	7.33195520371306E-07	1.20153124432384E-08	4.39571384702924E-07	1.65975033008042E-07	2.57430894005034E-10	1.14219925138189E-11	5.31265080527092E-10	1.49567067151154E-10
511190	4156290	122.817001342773	6.42006086699279E-07	1.0464162463428E-08	3.90205778839346E-07	1.47191219400271E-07	2.1894398764918E-10	9.8189655869281E-12	4.51766441065513E-10	1.27263808232799E-10
511390	4156290	114.212997436523	5.62020803320903E-07	9.10784476347598E-09	3.45875464941947E-07	1.30347993328547E-07	1.86017223713402E-10	8.4360167930804E-12	3.83761989388231E-10	1.08176641006439E-10
511590	4156290	113.448997497559	4.91889403964508E-07	7.9229430360686E-09	3.06156351621634E-07	1.15277351114192E-07	1.57884727858222E-10	7.24402111070893E-12	3.25667346816229E-10	9.186314347274E-11
511790	4156290	107.956001281738	4.30417785358108E-07	6.88865076540387E-09	2.70643944131819E-07	1.0182003379437E-07	1.33878897321169E-10	6.21747609128618E-12	2.76101567041031E-10	7.7937614110325E-11
511990	4156290	93.052001953125	3.76551716034927E-07	5.9865211536925E-09	2.38955631473618E-07	8.98261920116572E-08	1.1341920053124E-10	5.33410190174557E-12	2.3386393201782E-10	6.60646118977039E-11
512190	4156290	77.7580032348633	3.29361767249302E-07	5.20023199157501E-09	2.10732174226019E-07	7.91557721052977E-08	9.60019678456104E-11	4.57446994480982E-12	1.97912807074739E-10	5.59530645361759E-11
512390	4156290	55.2630004882812	2.88029509643038E-07	4.51536690798734E-09	1.85638506607089E-07	6.96786652679339E-08	8.11911511422331E-11	3.92166596343424E-12	1.67346504747657E-10	4.73509357956575E-11
512590	4156290	39.3129997253418	2.51834969782194E-07	3.91921444283325E-09	1.63363969462511E-07	6.12746627885157E-08	6.8610012418771E-11	3.36099524318443E-12	1.41386068579891E-10	4.00404339902916E-11
512790	4156290	19.681999206543	2.20145304586744E-07	3.40058374772885E-09	1.43622079752885E-07	5.38332547016953E-08	5.79336782465818E-11	2.87971010613473E-12	1.1935985635161E-10	3.38337150022704E-11
512990	4156290	14.3660001754761	1.92404629863932E-07	2.94963667182591E-09	1.26149932164711E-07	4.72533061869107E-08	4.88825059584733E-11	2.4667676867535E-12	1.00689804587735E-10	2.85690543273125E-11
513190	4156290	0	1.68124926924738E-07	2.55773572551357E-09	1.1070732188983E-07	4.14426435182513E-08	4.12161988809514E-11	2.11261528834656E-12	8.48792451635568E-11	2.41074518292934E-11
513390	4156290	NaN	1.46877943462295E-07	2.2173068075926E-09	9.70756629943782E-08	3.63175757033126E-08	3.47286051028074E-11	1.8090000311527E-12	7.15021377433392E-11	2.03296305774733E-11
513590	4156290	NaN	1.28288003266542E-07	1.92171566667685E-09	8.50567680214232E-08	3.18023748379533E-08	2.92431358254372E-11	1.54879817805483E-12	6.01935856075206E-11	1.7133391181438E-11
513790	4156290	NaN	1.12025640658189E-07	1.66515763580859E-09	7.44715442123069E-08	2.78287348671829E-08	2.46087464512451E-11	1.3258669169709E-12	5.06415179145611E-11	1.44312925866875E-11
513990	4156290	NaN	9.78019755948643E-08	1.44255893386919E-09	6.51586459510409E-08	2.43352219528178E-08	2.06964218002776E-11	1.13491636490624E-12	4.2579415387059E-11	1.21486250007199E-11
514190	4156290	NaN	8.53637546775308E-08	1.24948869683184E-09	5.69731213996969E-08	2.12667296140922E-08	1.73961078263917E-11	9.71394779853046E-13	3.57799611932388E-11	1.02216383792404E-11
514390	4156290	NaN	7.44889848188131E-08	1.08208080307148E-09	4.97850797377773E-08	1.85739475757882E-08	1.46140423568756E-11	8.31388794237971E-13	3.00495179494571E-11	8.59600147744185E-12
514590	4156290	NaN	6.49830940688622E-08	9.3696450894302E-10	4.34783999444878E-08	1.62128512523474E-08	1.22704370595799E-11	7.11534447385243E-13	2.52233323183829E-11	7.22546218257319E-12
514790	4156290	NaN	5.66755581824237E-08	8.11203263721167E-10	3.79494954953084E-08	1.41442166526844E-08	1.02974731472252E-11	6.08943793013718E-13	2.11613890709371E-11	6.07069187420035E-12
482590	4156490	167.837997436523	5.30621296201367E-11	1.06104236300561E-11	2.9126849067138E-11	1.72982176466313E-11	1.85445167236681E-13	4.74285967026653E-14	3.1655044504456E-13	1.18962616585666E-13
482790	4156490	188.438003540039	5.97575354105688E-11	1.18429632577928E-11	3.33187220068271E-11	1.95991517652144E-11	2.19770822221189E-13	5.44599944059101E-14	3.78241903031047E-13	1.40521917111396E-13
482990	4156490	194.843002319336	6.72757910660798E-11	1.32121594450005E-11	3.81050750660273E-11	2.22019739807838E-11	2.60489769829917E-13	6.25148447861003E-14	4.51882180129785E-13	1.66008332502391E-13
483190	4156490	222.117004394531	7.57144343658677E-11	1.4732202914292E-11	4.35689361412095E-11	2.51457123356353E-11	3.08795868893008E-13	7.17397269456277E-14	5.39768181605354E-13	1.96139917560101E-13
483390	4156490	206.272003173828	8.51820611518305E-11	1.64186245105333E-11	4.98047544009753E-11	2.84743716387054E-11	3.66105567199861E-13	8.23020540422922E-14	6.4463422124553E-13	2.31766267917751E-13
483590	4156490	230.171997070312	9.57995262719402E-11	1.82884015409315E-11	5.69199483671561E-11	3.22375598053472E-11	4.34099123881842E-13	9.43929895371968E-14	7.69734319740415E-13	2.73892532067817E-13
483790	4156490	250.240005493164	1.07701271802938E-10	2.0360069930833E-11	6.50366614195048E-11	3.64911927178959E-11	5.1476938677195E-13	1.0823079719431E-13	9.18939753622632E-13	3.23707794659241E-13
483990	4156490	250.434997558594	1.21036795568779E-10	2.2653841016496E-11	7.42937520892671E-11	4.12982867203993E-11	6.10479474156559E-13	1.24064685591986E-13	1.09685462184996E-12	3.82618611016302E-13
484190	4156490	245.188003540039	1.35972288645612E-10	2.51917371338163E-11	8.48490502326133E-11	4.67298590251409E-11	7.2403095814133E-13	1.42179204536331E-13	1.30895268238543E-12	4.52288599302761E-13
484390	4156490	272.592987060547	1.52692443527898E-10	2.79977227448211E-11	9.68819136631148E-11	5.28659336062857E-11	8.58744419699324E-13	1.62899274561899E-13	1.56173928441271E-12	5.34685166581934E-13
484590	4156490	278.007995605469	1.71402470544443E-10	3.10978542217985E-11	1.1059612520658E-10	5.97966817956555E-11	1.01855465107246E-12	1.86596045034521E-13	1.86294289073099E-12	6.32134706764496E-13
484790	4156490	285.130004882812	1.92330329225646E-10	3.45204187604372E-11	1.2622317434054E-10	6.76236945984337E-11	1.20812283929664E-12	2.13693385206946E-13	2.22174145153556E-12	7.47387524808189E-13
484990	4156490	260.467987060547	2.15729217072714E-10	3.82960842660411E-11	1.4402597416789E-10	7.64614190140319E-11	1.43296892567153E-12	2.44675360507924E-13	2.64902980911415E-12	8.83694388078745E-13
485190	4156490	216.949996948242	2.41880347969109E-10	4.24580601972161E-11	1.64303072653746E-10	8.64387796030702E-11	1.69962766379581E-12	2.80094847375412E-13	3.15773540470284E-12	1.04489674973785E-12
485390	4156490	190.496994018555	2.71096141785554E-10	4.70423034146704E-11	1.87393616327902E-10	9.77011002161176E-11	2.01583279762142E-12	3.20583852652418E-13	3.76319082504607E-12	1.23553332870692E-12
485590	4156490	151.033996582031	3.03723666645948E-10	5.20876561894147E-11	2.13682688592823E-10	1.10412117348838E-10	2.3907330882212E-12	3.66864296052878E-13	4.48357231881351E-12	1.46096456032921E-12
485790	4156490	137.707000732422	3.40148450247019E-10	5.76360201555524E-11	2.43607174584653E-10	1.24756206379316E-10	2.83514676926431E-12	4.19760824542879E-13	5.34041670517879E-12	1.72751937135986E-12
485990	4156490	131.639007568359	3.80798942027387E-10	6.37326004527891E-11	2.77662856374993E-10	1.40941096421785E-10	3.36186127556653E-12	4.80216349108163E-13	6.35923024434974E-12	2.04266839249841E-12
486190	4156490	159.934997558594	4.26151435919051E-10	7.04260946980935E-11	3.16412237687646E-10	1.59200812902096E-10	3.98598448351583E-12	5.49308868051797E-13	7.57020388327917E-12	2.41522638371334E-12
486390	4156490	140.600997924805	4.76735631304125E-10	7.77689089024022E-11	3.60493401698947E-10	1.79799009909087E-10	4.72535704867658E-12	6.28271003415528E-13	9.00905368653211E-12	2.8555899188797E-12
486590	4156490	83.1110000610352	5.33140931030903E-10	8.58173889749215E-11	4.10630045701086E-10	2.03032736893703E-10	5.60103583131141E-12	7.18512430592125E-13	1.07180072233451E-11	3.37601598160223E-12
486790	4156490	70.8410034179688	5.96023524000633E-10	9.46320635460247E-11	4.67642766328076E-10	2.29236663553649E-10	6.63786007444417E-12	8.21645591564632E-13	1.27469600506069E-11	3.9909481738347E-12
486990	4156490	70.7020034790039	6.66114429989004E-10	1.04277904828482E-10	5.32461839218952E-10	2.58787855151776E-10	7.8651137640728E-12	9.39515172395685E-13	1.51548301601869E-11	4.71739829603734E-12
487190	4156490	69.7929992675781	7.44228659412042E-10	1.14824720595621E-10	6.0614165929242E-10	2.921112305957E-10	9.31730038732983E-12	1.07423373308679E-12	1.80111427042605E-11	5.57539364018638E-12
487390	4156490	69.1009979248047	8.31275195707121E-10	1.26347222741283E-10	6.89876092278759E-10	3.29685141954927E-10	1.10350451361934E-11	1.22821694592233E-12	2.13978808469469E-11	6.58849471421302E-12
487590	4156490	66.7409973144531	9.28268753658435E-10	1.38925378146036E-10	7.85016798551362E-10	3.7204820657686E-10	1.30661483784703E-11	1.40422803491406E-12	2.5411646190615E-11	7.78440199100199E-12
487790	4156490	66.0979995727539	1.03634371643401E-09	1.5264494837773E-10	8.93095320222327E-10	4.19807617182733E-10	1.54668129577867E-11	1.60543133471738E-12	3.01661765714195E-11	9.19566432266355E-12
487990	4156490	68.9020004272461	1.15676902678282E-09	1.67597788527515E-10	1.01584542616715E-09	4.73647390609618E-10	1.83030694203773E-11	1.83544899033486E-12	3.57952752876514E-11	1.08604989943203E-11
488190	4156490	70.125	1.29096548561826E-09	1.83882279201032E-10	1.15522915788686E-09	5.34338036330835E-10	2.1652430987511E-11	2.09842730817194E-12	4.24562145004209E-11	1.28237448725915E-11
488390	4156490	70.0739974975586	1.44052545446918E-09	2.01603810488428E-10	1.31346609757823E-09	6.02747420141018E-10	2.56058116219518E-11	2.39911258243679E-12	5.03336828632638E-11	1.51379671359499E-11
488590	4156490	89.4869995117188	1.60723527607189E-09	2.2087531857101E-10	1.49306620493835E-09	6.7985294837515E-10	3.02697449605602E-11	2.74293757390117E-12	5.9644356164581E-11	1.78647353873103E-11
488790	4156490	108.27799987793	1.79310078622558E-09	2.41817886303059E-10	1.69686661871986E-09	7.66755222715797E-10	3.57689465916835E-11	3.13612005494062E-12	7.06421793483149E-11	2.107609966938E-11
488990	4156490	108.665000915527	2.00037634672323E-09	2.64561431274582E-10	1.92807285947057E-09	8.64693338007215E-10	4.22492671951509E-11	3.58577514826137E-12	8.36244584394731E-11	2.48562918338118E-11
489190	4156490	109.485000610352	2.23159789580683E-09	2.89245560403946E-10	2.19030488291505E-09	9.75062035756737E-10	4.98810898677867E-11	4.10004450398451E-12	9.89388710174827E-11	2.93036833712124E-11
489390	4156490	110.088996887207	2.48962034928412E-09	3.16020320797432E-10	2.48764850078702E-09	1.09943072660207E-09	5.88632243937378E-11	4.68823880465386E-12	1.1699151528345E-10	3.45330290234464E-11
489590	4156490	111.404998779297	2.77766007714733E-09	3.45047126947635E-10	2.82471267113259E-09	1.23956474210172E-09	6.94273651609789E-11	5.36100052372107E-12	1.38256127703663E-10	4.06780358070637E-11
489790	4156490	114.186996459961	3.09934314535221E-09	3.76499959865654E-10	3.20669323431237E-09	1.39744908483073E-09	8.18431818938787E-11	6.13049063367473E-12	1.63284610499584E-10	4.78942977037458E-11
489990	4156490	117.678001403809	3.4587599348939E-09	4.10566767922435E-10	3.63944368225163E-09	1.57531484365711E-09	9.64241137768822E-11	7.01060009684437E-12	1.92719019631369E-10	5.6362636661958E-11
490190	4156490	124.237998962402	3.86052680886377E-09	4.47451131493027E-10	4.12955358976348E-09	1.77566854068698E-09	1.13533941340305E-10	8.01718996200952E-12	2.27305172759806E-10	6.6292895099241E-11
490390	4156490	143.192001342773	4.30985540580127E-09	4.87373090349655E-10	4.68443522619484E-09	2.0013238916407E-09	1.33594207722718E-10	9.16833776041535E-12	2.67908038335205E-10	7.79282063401364E-11
490590	4156490	150.733001708984	4.81263124439106E-09	5.30571901128532E-10	5.31241922619646E-09	2.25543806863308E-09	1.57092591304552E-10	1.04846497709145E-11	3.15529080638272E-10	9.15498332108674E-11
490790	4156490	162.710998535156	5.3755015366886E-09	5.77307654274073E-10	6.02285961240681E-09	2.54155060457469E-09	1.84592284674678E-10	1.19895825764294E-11	3.71325718605724E-10	1.07482575166597E-10
490990	4156490	165.304992675781	6.00597392581307E-09	6.27863675653592E-10	6.82624902240182E-09	2.86362647931058E-09	2.16742469440616E-10	1.37098094930069E-11	4.3663306072417E-10	1.26100813215824E-10
491190	4156490	188.391998291016	6.71252679266411E-09	6.82548591621708E-10	7.73434456603285E-09	3.22610282313444E-09	2.54289938568795E-10	1.56756031912563E-11	5.12988050888827E-10	1.47835207418572E-10
491390	4156490	194.485000610352	7.5047329422473E-09	7.41700159105977E-10	8.76030501328596E-09	3.6339408358364E-09	2.98091953556294E-10	1.79213004277092E-11	6.02156154715762E-10	1.7318012979533E-10
491590	4156490	202.070999145508	8.3933968983719E-09	8.05688186922933E-10	9.91883939097774E-09	4.09268123723086E-09	3.49130334881066E-10	2.04857749253111E-11	7.06160646524062E-10	2.027017943118E-10
491790	4156490	213.462005615234	9.39070770006406E-09	8.74918333217168E-10	1.12263674346449E-08	4.60850455301816E-09	4.08526818036686E-10	2.34129622311867E-11	8.2731452636631E-10	2.37047123945403E-10
491990	4156490	236.093002319336	1.05104079453252E-08	9.49836007477059E-10	1.2701191945046E-08	5.18829575961894E-09	4.77559634085214E-10	2.67524172754851E-11	9.68255013566986E-10	2.76953326444432E-10
492190	4156490	265.31201171875	1.1767980510045E-08	1.03093014405895E-09	1.43636828236121E-08	5.83971305723209E-09	5.57681247133424E-10	3.05598969523552E-11	1.13198046489147E-09	3.23258132779243E-10
492390	4156490	278.938995361328	1.31808545290256E-08	1.11873820310035E-09	1.6236472422991E-08	6.57126150803166E-09	6.50537125807974E-10	3.48979918810632E-11	1.32188944669567E-09	3.76910644112439E-10
492590	4156490	280.865997314453	1.4768631591588E-08	1.21385175927649E-09	1.83446613711051E-08	7.3923708263222E-09	7.57985334137352E-10	3.98367871644195E-11	1.54182153150742E-09	4.38982658314198E-10
492790	4156490	273.614990234375	1.6553332786395E-08	1.31692056197159E-09	2.07160335101676E-08	8.3134754752852E-09	8.82116622846799E-10	4.54544822777127E-11	1.79609919516753E-09	5.10680258909269E-10
492990	4156490	283.893005371094	1.85596682913297E-08	1.42865780782576E-09	2.33812783059102E-08	9.346098232231E-09	1.02527463507772E-09	5.18380325780948E-11	2.08956997124473E-09	5.93355488274398E-10
493190	4156490	295.263000488281	2.08153319982683E-08	1.54984916042373E-09	2.63742184086882E-08	1.05029380094025E-08	1.190075742658E-09	5.90838590386448E-11	2.42764774405529E-09	6.88517842056263E-10
493390	4156490	299.838012695312	2.33513184501862E-08	1.68135803987443E-09	2.97320389840038E-08	1.17979559219589E-08	1.37942768461276E-09	6.72984059459095E-11	2.81635173009027E-09	7.97845037620574E-10
493590	4156490	301.092987060547	2.62022650873558E-08	1.82413151611955E-09	3.34955162412776E-08	1.32464614512142E-08	1.59654616282965E-09	7.65986219653861E-11	3.26234135810915E-09	9.23192636335508E-10
493790	4156490	300.523986816406	2.9406823240757E-08	1.97920772069072E-09	3.77092394062464E-08	1.48651972133217E-08	1.84496845548977E-09	8.71123489684882E-11	3.77294479825509E-09	1.0666019104134E-09
493990	4156490	294.959014892578	3.30080443317421E-08	2.14772198049448E-09	4.24218135538323E-08	1.66724160046166E-08	2.12856275120832E-09	9.89785885114842E-11	4.35617855553642E-09	1.23030524535698E-09
494190	4156490	294.631011962891	3.70537955034965E-08	2.33091320771046E-09	4.76860464045831E-08	1.86879522249795E-08	2.45153153097934E-09	1.12347520953329E-10	5.02075494229168E-09	1.41672813969975E-09
494390	4156490	302.428985595703	4.15972048996693E-08	2.53013144528062E-09	5.35591087436896E-08	2.09332845257946E-08	2.81840740007283E-09	1.27380255006392E-10	5.7760738162841E-09	1.62848682553194E-09
494590	4156490	305.398010253906	4.66971352005035E-08	2.74684482183897E-09	6.01026610812505E-08	2.34315859023388E-08	3.23403935952831E-09	1.44248240611371E-10	6.63219448954381E-09	1.86838037235669E-09
494790	4156490	310.171997070312	5.24186701056213E-08	2.98264553755971E-09	6.73829243797651E-08	2.62077529913176E-08	3.70356733407538E-09	1.63132289782778E-10	7.59978325973369E-09	2.13937602498664E-09
494990	4156490	309.971984863281	5.88336270600347E-08	3.23925337820052E-09	7.54706933510483E-08	2.92884130712539E-08	4.23238254686957E-09	1.84221034279025E-10	8.69003163698576E-09	2.44458634045661E-09
495190	4156490	301.055999755859	6.60210914740763E-08	3.51851874310876E-09	8.4441276798559E-08	3.27019044388481E-08	4.82607129646883E-09	2.07708812138369E-10	9.91454011262125E-09	2.7872367486167E-09
495390	4156490	284.190002441406	7.406797562668E-08	3.82242857970749E-09	9.43743515794608E-08	3.64782274921497E-08	5.49033971969267E-09	2.33792998304582E-10	1.12851622522212E-08	3.17062216110924E-09
495590	4156490	263.713012695312	8.3069597539566E-08	4.15310662232528E-09	1.05353715909418E-07	4.06489558634695E-08	6.23091690561718E-09	2.62670460012936E-10	1.28138040605302E-08	3.5980510514983E-09
495790	4156490	262.772003173828	9.31302869397441E-08	4.51281387515741E-09	1.17466928720351E-07	4.52471066132474E-08	7.0534343343922E-09	2.94533217270104E-10	1.45121741112583E-08	4.07277586792024E-09
495990	4156490	274.886993408203	1.04364018353667E-07	4.90394540767952E-09	1.30804822484601E-07	5.03069624284686E-08	7.96327988452423E-09	3.29563219312471E-10	1.63914808437545E-08	4.59790875666321E-09
496190	4156490	273.868988037109	1.1689508181725E-07	5.32902758361164E-09	1.45460879490337E-07	5.58638448534164E-08	8.96542541084302E-09	3.67926259882157E-10	1.8462074862344E-08	5.17632203834962E-09
496390	4156490	273.919006347656	1.30858806506449E-07	5.79071592989042E-09	1.61530464465842E-07	6.19538361243744E-08	1.00642277679622E-08	4.09765003101268E-10	2.0733036008503E-08	5.81053335491683E-09
496590	4156490	271.024993896484	1.46402364487355E-07	6.2917826232254E-09	1.79109917948852E-07	6.86134441362802E-08	1.12632040190231E-08	4.55190717357106E-10	2.32117073980388E-08	6.50257577416331E-09
496790	4156490	255.016998291016	1.63685637386053E-07	6.8351056677169E-09	1.98295495274299E-07	7.58792128186788E-08	1.25647841249452E-08	5.04274487872676E-10	2.59031822430668E-08	7.25385496457242E-09
496990	4156490	266.832000732422	1.82882200317047E-07	7.42366486132244E-09	2.19182174185941E-07	8.37872894834344E-08	1.3970045772168E-08	5.57038210574566E-10	2.88097529061233E-08	8.06499617322068E-09
497190	4156490	274.674011230469	2.04180502660809E-07	8.06053207246727E-09	2.41862369563074E-07	9.23729550362491E-08	1.5478437250832E-08	6.13444804087707E-10	3.19303356451778E-08	8.93568416949187E-09
497390	4156490	284.368988037109	2.27785342000405E-07	8.7488689820242E-09	2.66424608464738E-07	1.01670144664774E-07	1.7087497655694E-08	6.7338835002776E-10	3.52598896958885E-08	9.86450163132061E-09
497590	4156490	284.108001708984	2.53919576046525E-07	9.49192309973454E-09	2.92952165489958E-07	1.11710953119331E-07	1.87925857453025E-08	7.36684629763079E-10	3.8788854107458E-08	1.08487725404625E-08
497790	4156490	283.742004394531	2.8282626636419E-07	1.02930334764256E-08	3.21521771478983E-07	1.22525172663524E-07	2.05866309466987E-08	8.03062475829612E-10	4.25026304099784E-08	1.18844183552908E-08
497990	4156490	294.294006347656	3.14771338349282E-07	1.11556436800561E-08	3.52202478991739E-07	1.34139892230279E-07	2.2459922029322E-08	8.72156487889068E-10	4.6381143326021E-08	1.29658359251633E-08
498190	4156490	302.018005371094	3.50046896453512E-07	1.20833301143042E-08	3.85054794875532E-07	1.46579202742213E-07	2.43999504265959E-08	9.43501714080518E-10	5.03985147604601E-08	1.4085806950685E-08
498390	4156490	311.635986328125	3.889753355242E-07	1.3079848914522E-08	4.20130208307498E-07	1.59864056971616E-07	2.63913258657409E-08	1.01653095728062E-09	5.45228876963008E-08	1.52354492076716E-08
498590	4156490	302.440002441406	4.3191440708589E-07	1.4149207613011E-08	4.57471256418068E-07	1.74012339157409E-07	2.84157815744768E-08	1.0905753191959E-09	5.87164358380373E-08	1.64042195094537E-08
498790	4156490	313.611999511719	4.79263389244204E-07	1.52957517716528E-08	4.97112275691065E-07	1.89039191550691E-07	3.0452284520556E-08	1.16486810862378E-09	6.29355913674914E-08	1.75799771008357E-08
498990	4156490	320.316986083984	5.31470510251062E-07	1.65242973087314E-08	5.39080986211525E-07	2.04957670608401E-07	3.24772634903575E-08	1.23855343403383E-09	6.71315168209067E-08	1.87491153650239E-08
499190	4156490	322.032989501953	5.89041739478932E-07	1.7840294900145E-08	5.83401036721938E-07	2.21779770264516E-07	3.44649626326634E-08	1.31069910457764E-09	7.12508373521625E-08	1.98967658895077E-08
499390	4156490	337.380004882812	6.52551006381815E-07	1.92500323545268E-08	6.30095605162069E-07	2.39517850204061E-07	3.63879222589408E-08	1.38031403438668E-09	7.52366370450832E-08	2.10070760074382E-08
499590	4156490	337.748992919922	7.22675921596194E-07	2.07612886609927E-08	6.79199296260074E-07	2.58189345639441E-07	3.82175813343701E-08	1.44636993423498E-09	7.90297077356016E-08	2.20635565894841E-08
499790	4156490	341.388000488281	8.0030577808956E-07	2.23852446690806E-08	7.3079232024659E-07	2.77830317236126E-07	3.99249879000388E-08	1.50782685032037E-09	8.25700218222226E-08	2.30494921835629E-08
499990	4156490	361.631988525391	8.86401465278039E-07	2.41341442429276E-08	7.84961075955209E-07	2.98479738528058E-07	4.14815949657722E-08	1.56366141296735E-09	8.57983829122925E-08	2.39484004026524E-08
500190	4156490	368.638000488281	9.8218310156674E-07	2.60246125093883E-08	8.4185037878587E-07	3.20200456529504E-07	4.28601124679095E-08	1.61289752191651E-09	8.86581922943518E-08	2.47445238817222E-08
500390	4156490	380.552001953125	1.08908588355792E-06	2.80769952793883E-08	9.01658583353101E-07	3.43077010199046E-07	4.40353778117042E-08	1.65463749293301E-09	9.10972543508576E-08	2.54233329213991E-08
500590	4156490	384.027008056641	1.20871156691061E-06	3.03146851945737E-08	9.64630592523706E-07	3.67212678207958E-07	4.49852033892929E-08	1.688092208114E-09	9.30695345856282E-08	2.59720148077557E-08
500790	4156490	387.936004638672	1.34265958300471E-06	3.27612162386524E-08	1.03100490437519E-06	3.92708522065183E-07	4.56911575399745E-08	1.71260890124178E-09	9.45367797265087E-08	2.63799247432129E-08
500990	4156490	401.932006835938	1.49288364824069E-06	3.54465206789108E-08	1.1011227349907E-06	4.19706747153384E-07	4.61392362933057E-08	1.72769509956336E-09	9.54699113888731E-08	2.66389737808902E-08
501190	4156490	392.759002685547	1.66168365509466E-06	3.8406870435622E-08	1.17542639343171E-06	4.48390079758057E-07	4.63203874157034E-08	1.73303709182247E-09	9.58501136541361E-08	2.67439314000929E-08
501390	4156490	370.621002197266	1.85166879701312E-06	4.16843093554274E-08	1.25444757123555E-06	4.78977180926694E-07	4.62308559841015E-08	1.72851213919397E-09	9.56695504834713E-08	2.66926251191894E-08
501590	4156490	365.872009277344	2.0656532120797E-06	4.53248561327903E-08	1.33878064785683E-06	5.11711869311014E-07	4.58723303142724E-08	1.71419334722885E-09	9.49316697440686E-08	2.64860248652719E-08
501790	4156490	361.044006347656	2.30625677119144E-06	4.93715231762929E-08	1.42898228550878E-06	5.46822441554254E-07	4.52518798645423E-08	1.69034734372935E-09	9.36510751625416E-08	2.61282072417164E-08
501990	4156490	363.43798828125	2.57657848367079E-06	5.38760848115785E-08	1.5257276856415E-06	5.84585560816021E-07	4.43816883354281E-08	1.65742443655936E-09	9.18529738825235E-08	2.56262014941865E-08
502190	4156490	348.674011230469	2.88057181565066E-06	5.89044802940321E-08	1.62983189284787E-06	6.25337400326283E-07	4.32785982317892E-08	1.61604213804207E-09	8.95722329554161E-08	2.49897266831571E-08
502390	4156490	338.798004150391	3.22241763721511E-06	6.45266356729338E-08	1.74213295551842E-06	6.69424989684804E-07	4.19634938804545E-08	1.56696300325303E-09	8.68521007308524E-08	2.4230835631186E-08
502590	4156490	337.736999511719	3.60625188365138E-06	7.0811891043945E-08	1.86342735518869E-06	7.17180000630252E-07	4.04605582937051E-08	1.51106743373434E-09	8.37426669418032E-08	2.3363485733475E-08
502790	4156490	330.127014160156	4.03633410050613E-06	7.78313588245082E-08	1.99446692316624E-06	7.68919145712219E-07	3.87964457352261E-08	1.4493243110047E-09	8.02991474027427E-08	2.2403061567613E-08
502990	4156490	331.480987548828	4.51698396410303E-06	8.56560828182054E-08	2.13591200202053E-06	8.24926108101455E-07	3.69994132908168E-08	1.38275970618682E-09	7.65800837599469E-08	2.13658735162878E-08
503190	4156490	330.941986083984	5.05247229565887E-06	9.43548429838952E-08	2.28827793921688E-06	8.85430839717097E-07	3.50984545635348E-08	1.31242584950043E-09	7.26455474362771E-08	2.02686576955339E-08
503390	4156490	322.174987792969	5.64675405302658E-06	1.03991691604527E-07	2.45187709357503E-06	9.5058706895856E-07	3.31224744516899E-08	1.23937135399483E-09	6.85554290552246E-08	1.91280995192561E-08
503590	4156490	322.486999511719	6.303497861433E-06	1.14623437090555E-07	2.62676031850481E-06	1.02044958603897E-06	3.10995385314556E-08	1.16461424971111E-09	6.43678822758685E-08	1.79604003608617E-08
503790	4156490	332.605987548828	7.02420703157485E-06	1.26270020530743E-07	2.81240331930185E-06	1.09484216169185E-06	2.90562225974764E-08	1.08911861508061E-09	6.0137975236731E-08	1.67809020266063E-08
503990	4156490	336.447998046875	7.80529286544702E-06	1.38867954868978E-07	3.00723883819785E-06	1.17315901932704E-06	2.70170796784944E-08	1.0137754245564E-09	5.59165855229552E-08	1.56037790391254E-08
504190	4156490	340.462005615234	8.64261043595858E-06	1.52341797309888E-07	3.2093251673317E-06	1.2546516934239E-06	2.50042334733291E-08	9.39387932154455E-10	5.17495572116456E-08	1.44418038966824E-08
504390	4156490	333.661010742188	9.52810012249934E-06	1.66550813490554E-07	3.41584533434308E-06	1.33821426194795E-06	2.30370993869565E-08	8.66661632892033E-10	4.76771224473463E-08	1.33061859905494E-08
504590	4156490	333.256011962891	1.04479335593671E-05	1.81260019682875E-07	3.62286437885926E-06	1.42227726656363E-06	2.11322276852577E-08	7.96198630968592E-10	4.37335761521548E-08	1.22064810266018E-08
504790	4156490	319.828002929688	1.13799146409302E-05	1.96099815517417E-07	3.82500998423306E-06	1.50466668546561E-06	1.93032580117573E-08	7.28496076581658E-10	3.99471815097618E-08	1.11505647607024E-08
504990	4156490	318.082000732422	1.22897141594907E-05	2.10506772382023E-07	4.015008432735E-06	1.58239866303548E-06	1.75609703769966E-08	6.63947696345519E-10	3.63402759577229E-08	1.01446622889024E-08
505190	4156490	326.087005615234	1.31257848855495E-05	2.23647079301547E-07	4.183086026843E-06	1.65141461586943E-06	1.59134162745077E-08	6.02848467374672E-10	3.29295429051212E-08	9.19342368621767E-09
505390	4156490	323.983001708984	1.38153470479745E-05	2.34355082819587E-07	4.3165311620371E-06	1.70638394125806E-06	1.43661121875593E-08	5.45401808876721E-10	2.97264124518105E-08	8.30003577516864E-09
505590	4156490	310.389007568359	1.42680327334756E-05	2.41192878793825E-07	4.40040256642504E-06	1.74099759337158E-06	1.29222776078182E-08	4.91728070162406E-10	2.67375547792744E-08	7.46635947284068E-09
505790	4156490	312.192993164062	1.43979153717621E-05	2.42800575562487E-07	4.42097030468495E-06	1.74943333161528E-06	1.1583101470273E-08	4.41874025093816E-10	2.39654324701751E-08	6.69308353675637E-09
505990	4156490	309.5	1.41635102549318E-05	2.38530404191066E-07	4.37180151533844E-06	1.72895652391505E-06	1.03480225617811E-08	3.95822938948303E-10	2.14088817014954E-08	5.97988640400455E-09
506190	4156490	315.747009277344	1.35955908054516E-05	2.28882751508281E-07	4.2578949530735E-06	1.68169043490138E-06	9.21501153419011E-09	3.53504700743431E-10	1.90636967550211E-08	5.32559895999586E-09
506390	4156490	308.1669921875	1.27811467210088E-05	2.15251723650009E-07	4.0931878519604E-06	1.61355417417204E-06	8.18084456133613E-09	3.1480566388541E-10	1.69231971929779E-08	4.72836248645769E-09
506590	4156490	308.105010986328	1.18212859782801E-05	1.992574351086E-07	3.89409894964339E-06	1.53150649044011E-06	7.24136102082168E-09	2.79577921791983E-10	1.49787619045037E-08	4.18577739074711E-09
506790	4156490	302.774993896484	1.08007512177438E-05	1.82261787979562E-07	3.67481542708E-06	1.44153598737169E-06	6.39169978976394E-09	2.47647844439613E-10	1.32203187940852E-08	3.69503960470768E-09
506990	4156490	302.535003662109	9.77915367524007E-06	1.65228082497264E-07	3.44586801503626E-06	1.34805735238033E-06	5.626510660277E-09	2.18823632138769E-10	1.16367829633662E-08	3.25306257440483E-09
507190	4156490	297.110992431641	8.79413379791136E-06	1.4876983687127E-07	3.21452845131449E-06	1.25408595613366E-06	4.94013922755246E-09	1.92902069647254E-10	1.02164397779336E-08	2.85658401638745E-09
507390	4156490	298.046997070312	7.86740870202342E-06	1.33245848999044E-07	2.98566617056878E-06	1.16160768036895E-06	4.32678476209305E-09	1.69674217154075E-10	8.9472720077302E-09	2.50225703131064E-09
507590	4156490	296.087005615234	7.0100484011536E-06	1.18843521001501E-07	2.76250646131375E-06	1.07190569533356E-06	3.78063182086065E-09	1.4893018129305E-10	7.81723251359472E-09	2.18672607138931E-09
507790	4156490	290.894989013672	6.22628053973319E-06	1.05639204837576E-07	2.5471774048239E-06	9.85796349525154E-07	3.29595708617133E-09	1.30463001709363E-10	6.81446558252436E-09	1.90668861224755E-09
507990	4156490	290.507995605469	5.5160544781828E-06	9.36390775304492E-08	2.34107525677491E-06	9.03787115274943E-07	2.86721348293562E-09	1.14071746928271E-10	5.92748114725589E-09	1.65894372358496E-09
508190	4156490	287.540008544922	4.8767288204351E-06	8.28062008949946E-08	2.14510060547505E-06	8.26179084885412E-07	2.48909389716673E-09	9.95637991293245E-11	5.14528679357834E-09	1.44042882668282E-09
508390	4156490	275.347991943359	4.30417358254049E-06	7.3078316139722E-08	1.9598086714835E-06	7.53132570159109E-07	2.15657707094869E-09	8.67565375180355E-11	4.45748279513772E-09	1.24824618519199E-09
508590	4156490	265.977996826172	3.79348706456205E-06	6.43795105276012E-08	1.78550448432722E-06	6.84708898673479E-07	1.86495823749022E-09	7.54785431003475E-11	3.85432546710297E-09	1.07968062552484E-09
508790	4156490	265.851989746094	3.33945882271353E-06	5.66278198500103E-08	1.62230363140805E-06	6.20897191743427E-07	1.60986688749242E-09	6.55702655598937E-11	3.32676391750198E-09	9.3220979290289E-10
508990	4156490	261.722991943359	2.93686442724392E-06	4.97401255741674E-08	1.47017217528687E-06	5.61631897490448E-07	1.38727399796725E-09	5.68843177241108E-11	2.86645495781741E-09	8.03508329957934E-10
509190	4156490	259.329010009766	2.58064826611753E-06	4.36352418306818E-08	1.32895445363228E-06	5.06804794907303E-07	1.19349081748318E-09	4.92854628711997E-11	2.46576052307064E-09	6.9144718183297E-10
509390	4156490	254.128997802734	2.26603172570972E-06	3.82357900000232E-08	1.19839414607287E-06	4.56273793417237E-07	1.02516108106572E-09	4.26503696403085E-11	2.11773147748787E-09	5.94089112722213E-10
509590	4156490	247.240997314453	1.98857175776704E-06	3.34692623199978E-08	1.07815175000387E-06	4.09869918083471E-07	8.79248278620911E-10	3.68671873741733E-11	1.81608117564354E-09	5.09681368160749E-10
509790	4156490	247.246002197266	1.74418670638992E-06	2.92685466167976E-08	9.67820143110534E-07	3.6740325973804E-07	7.53019367561425E-10	3.18349888909091E-11	1.55515166432806E-09	4.3664628430206E-10
509990	4156490	239.940994262695	1.5291608258289E-06	2.55720958552621E-08	8.66938993486508E-07	3.28668282026461E-07	6.44026083269148E-10	2.74631021980713E-11	1.32987493569665E-09	3.73570500557414E-10
510190	4156490	217.973007202148	1.3401352473048E-06	2.23238700031341E-08	7.75008250334501E-07	2.93448651002293E-07	5.5008483951248E-10	2.36704153269728E-11	1.13573123877803E-09	3.19193370790961E-10
510390	4156490	198.240005493164	1.17409065361575E-06	1.94731342268276E-08	6.91500675131254E-07	2.61521626576782E-07	4.69255978866976E-10	2.03846626197398E-11	9.68706042990167E-10	2.72395002679947E-10
510590	4156490	174.557998657227	1.02832521807235E-06	1.69741704533543E-08	6.15873274355856E-07	2.32662002229824E-07	3.99822961214498E-10	1.75416811328376E-11	8.25246904795686E-10	2.32184249381283E-10
510790	4156490	159.621002197266	9.00430197310631E-07	1.4785941913657E-08	5.47577481487287E-07	2.06645563408775E-07	3.40271976612338E-10	1.50846871220149E-11	7.02221212003724E-10	1.97686949172605E-10
510990	4156490	162.884994506836	7.88264769364188E-07	1.28717369363568E-08	4.86067982400456E-07	1.8325204324226E-07	2.89272323104371E-10	1.29635788673828E-11	5.9687551701424E-10	1.68134606682145E-10
511190	4156490	155.453994750977	6.89931157512866E-07	1.11988084272488E-08	4.30810133304625E-07	1.62267567744347E-07	2.45657792826768E-10	1.1134274468231E-11	5.06796962940622E-10	1.4285365596062E-10
511390	4156490	132.643005371094	6.03750705519718E-07	9.7380207432433E-09	3.81285988867193E-07	1.43486604365819E-07	2.08409225317698E-10	9.55808771120985E-12	4.29877134186625E-10	1.21255395786667E-10
511590	4156490	123.331001281738	5.28241308952831E-07	8.4635109333246E-09	3.36999006895645E-07	1.26713442294587E-07	1.76638321461295E-10	8.20114494581872E-12	3.64278525122694E-10	1.02826650819514E-10
511790	4156490	120.509002685547	4.62096429076542E-07	7.35236935507842E-09	2.97477535565997E-07	1.11763245940401E-07	1.49572767239905E-10	7.03385817433402E-12	3.0840371499654E-10	8.71211931915981E-11
511990	4156490	100.656997680664	4.04165792398438E-07	6.38434110636761E-09	2.62277214372532E-07	9.84627298401932E-08	1.26542655431076E-10	6.03043439644269E-12	2.60867243430157E-10	7.37519083765657E-11
512190	4156490	70.4359970092773	3.53437795822701E-07	5.54154944853468E-09	2.30982432042443E-07	8.66505074070716E-08	1.0696817886828E-10	5.16842541075922E-12	2.2047012359717E-10	6.23836917034703E-11
512390	4156490	56.0180015563965	3.09023581126373E-07	4.80824211117117E-09	2.03206987521939E-07	7.6177166797433E-08	9.0348551828964E-11	4.42833133771278E-12	1.86176895415019E-10	5.27270593090414E-11
512590	4156490	37.265998840332	2.70142706599799E-07	4.1705598991295E-09	1.78594099382352E-07	6.69051259579276E-08	7.62520857711425E-11	3.7932433419937E-12	1.57095072689361E-10	4.45324240453789E-11
512790	4156490	22.7940006256104	2.36110319100278E-07	3.61632618893173E-09	1.56815892713784E-07	5.87083125098169E-08	6.4307339489517E-11	3.24851939083471E-12	1.32456819339636E-10	3.75849880027718E-11
512990	4156490	16.9479999542236	2.063257177839E-07	3.13485655056588E-09	1.37572482024543E-07	5.14717107398048E-08	5.41952671708393E-11	2.78149780940148E-12	1.1160269250251E-10	3.17002120425231E-11
513190	4156490	0	1.8026219502189E-07	2.71678721721816E-09	1.20590754778083E-07	4.5090812629657E-08	4.56422794950864E-11	2.38124418405141E-12	9.39672775342978E-11	2.67198125730542E-11
513390	4156490	0	1.57458039245177E-07	2.35392099440583E-09	1.05622945236349E-07	3.94710043764483E-08	3.84141318364578E-11	2.03832586388874E-12	7.90665362364853E-11	2.2508233864837E-11
513590	4156490	0	1.37508587454172E-07	2.03908931068297E-09	9.24450739412915E-08	3.4526914754896E-08	3.23105601486218E-11	1.74461185948053E-12	6.64867037804693E-11	1.89495505673112E-11
513790	4156490	NaN	1.20059218767135E-07	1.7660294926407E-09	8.08553142071219E-08	3.0181746881695E-08	2.71605931304728E-11	1.4931020563532E-12	5.58745870921292E-11	1.59447641792769E-11
513990	4156490	NaN	1.04799189664625E-07	1.52927529825899E-09	7.06723324457415E-08	2.63666090216317E-08	2.28184619632577E-11	1.27777616953446E-12	4.69291002548945E-11	1.34094427414441E-11
514190	4156490	NaN	9.14562166625987E-08	1.32405965763835E-09	6.17336422832374E-08	2.30198581841595E-08	1.91600420280781E-11	1.09346076476448E-12	3.93939020237593E-11	1.12716666713758E-11
514390	4156490	NaN	7.97917218117648E-08	1.14622845611503E-09	5.38940015834441E-08	2.00864662745863E-08	1.60797646273023E-11	9.35711477784722E-13	3.30510068020504E-11	9.47024444704423E-12
514590	4156490	NaN	6.95966620616108E-08	9.92164386573604E-10	4.70238729328509E-08	1.75174155976496E-08	1.34879453630456E-11	8.00713183980586E-13	2.7715257789549E-11	7.95317058699193E-12
514790	4156490	NaN	6.0687874151366E-08	8.58719789416702E-10	4.10079630325726E-08	1.52691285979919E-08	1.13084778568071E-11	6.85193928585363E-13	2.32295571392456E-11	6.67629490358239E-12
482590	4156690	176.764999389648	5.87432447619625E-11	1.18818474410075E-11	3.15880874904376E-11	1.89999726474489E-11	2.04272352809939E-13	5.45525462836674E-14	3.44855626028788E-13	1.31717998450199E-13
482790	4156690	213.069000244141	6.61767060067402E-11	1.32682330647305E-11	3.61445904594428E-11	2.1530918088287E-11	2.42055097816001E-13	6.26524623375293E-14	4.12207913960736E-13	1.55566582017567E-13
482990	4156690	217.666000366211	7.45265682711481E-11	1.48091516024268E-11	4.13486992806223E-11	2.43943572554412E-11	2.8687693544037E-13	7.1932354412802E-14	4.92638848308464E-13	1.83757507377089E-13
483190	4156690	239.641006469727	8.39017436992084E-11	1.65207680858134E-11	4.72910476628315E-11	2.7633325263946E-11	3.40054191009226E-13	8.25613810940419E-14	5.88670293340865E-13	2.17085197188515E-13
483390	4156690	234.27099609375	9.4423495316797E-11	1.84207671957323E-11	5.40747572173349E-11	3.12963336005408E-11	4.03149148631444E-13	9.47324889221316E-14	7.03306111546117E-13	2.56489634116301E-13
483590	4156690	249.600997924805	1.06226774159677E-10	2.05284965735585E-11	6.18171368734503E-11	3.5438074711994E-11	4.78015878691013E-13	1.08666024174933E-13	8.40123326145468E-13	3.03083239356123E-13
483790	4156690	262.846984863281	1.19461696302757E-10	2.28650958769903E-11	7.06516062450693E-11	4.01201982200944E-11	5.66854388655868E-13	1.24613541772921E-13	1.00338020496948E-12	3.58182392573851E-13
483990	4156690	273.942993164062	1.3429517100105E-10	2.54536309197462E-11	8.07298772537164E-11	4.5412183519909E-11	6.72274720630845E-13	1.42862209930931E-13	1.19814443355777E-12	4.23344727933614E-13
484190	4156690	277.476013183594	1.50912708548914E-10	2.83192430359724E-11	9.22244279556599E-11	5.13923274955498E-11	7.97372788998571E-13	1.63739858139212E-13	1.43044502639418E-12	5.00413210810492E-13
484390	4156690	285.032012939453	1.6952042560522E-10	3.14893096211312E-11	1.05331307019728E-10	5.81488586247788E-11	9.45820059934317E-13	1.87620749701695E-13	1.70745227685469E-12	5.91568197677733E-13
484590	4156690	276.532989501953	1.90347263576938E-10	3.49936058120342E-11	1.20273312350832E-10	6.57811867285299E-11	1.12196957280722E-12	2.14932216547567E-13	2.03769080658493E-12	6.9938892515116E-13
484790	4156690	249.335006713867	2.13647459497757E-10	3.88644858568305E-11	1.37303593568244E-10	7.44013181696886E-11	1.33098125513244E-12	2.46162341211608E-13	2.43129166056095E-12	8.2692614415699E-13
484990	4156690	240.360992431641	2.39703273410154E-10	4.31370399721598E-11	1.56709733379971E-10	8.41354280443341E-11	1.57896957127313E-12	2.81868355198607E-13	2.90029041295317E-12	9.77787507094067E-13
485190	4156690	225.292007446289	2.68828042836221E-10	4.78492851079548E-11	1.78818371786774E-10	9.51256498262152E-11	1.87317800808519E-12	3.22686573952285E-13	3.45897948064031E-12	1.15623848874487E-12
485390	4156690	177.753997802734	3.01369586923377E-10	5.30423606160645E-11	2.04000447529921E-10	1.0753209072782E-10	2.22218481796941E-12	3.69343750912787E-13	4.12432430375226E-12	1.36732132145642E-12
485590	4156690	188.147003173828	3.37714037302574E-10	5.8760777435696E-11	2.32677137115717E-10	1.21535132871158E-10	2.63614595476687E-12	4.22670677210252E-13	4.9164546161342E-12	1.61699553411364E-12
485790	4156690	149.233993530273	3.78290058957155E-10	6.50525634169208E-11	2.65326544333412E-10	1.37337938573024E-10	3.12707992938137E-12	4.83616112066898E-13	5.85924301753722E-12	1.91230193321118E-12
485990	4156690	182.408004760742	4.23573734058065E-10	7.19694953710072E-11	3.0249160808133E-10	1.55169450494259E-10	3.70920391191035E-12	5.53263873324733E-13	6.9809874918124E-12	2.2615565276461E-12
486190	4156690	166.158004760742	4.74093956748359E-10	7.95673839355725E-11	3.44788719455072E-10	1.75287681351381E-10	4.3993295332231E-12	6.32853187092617E-13	8.31521556436886E-12	2.67457917168392E-12
486390	4156690	141.682006835938	5.30438308071326E-10	8.79062897053075E-11	3.92916988707493E-10	1.97983193931912E-10	5.21732700328025E-12	7.23800789458362E-13	9.9016294986568E-12	3.16296097412786E-12
486590	4156690	74.1019973754883	5.93259976095298E-10	9.70507842597008E-11	4.4766955234751E-10	2.23583345549848E-10	6.18667029385828E-12	8.27726653931161E-13	1.17872175476431E-11	3.74037849779609E-12
486790	4156690	71.6800003051758	6.63285482279516E-10	1.07070224040523E-10	5.0994606126403E-10	2.5245696658198E-10	7.33507663721686E-12	9.46483517475299E-13	1.4027558874642E-11	4.42296221439467E-12
486990	4156690	70.9960021972656	7.41323438080344E-10	1.18039041700657E-10	5.80766814246613E-10	2.85019643510274E-10	8.69525582347599E-12	1.08219073933232E-12	1.66883543217945E-11	5.22972815818965E-12
487190	4156690	67.3050003051758	8.28274418962077E-10	1.30037069998631E-10	6.61288650487488E-10	3.21739657072206E-10	1.03057874054725E-11	1.23727341272764E-12	1.98472202214175E-11	6.18308333848336E-12
487390	4156690	71.4570007324219	9.25142263035141E-10	1.43150017443653E-10	7.52822976725458E-10	3.63144787318983E-10	1.22121471621684E-11	1.41450945820352E-12	2.35957882595905E-11	7.30941834470648E-12
487590	4156690	69.1969985961914	1.03304673707906E-09	1.57469385825814E-10	8.56856050046487E-10	4.09829574637079E-10	1.44679020026547E-11	1.61707301776168E-12	2.80421589883489E-11	8.63979121063281E-12
487790	4156690	68.2249984741211	1.15323815991984E-09	1.73093208312259E-10	9.75071891617865E-10	4.62464054916775E-10	1.7136109136247E-11	1.8485987388685E-12	3.33137682937489E-11	1.02107363625036E-11
487990	4156690	69.7570037841797	1.28711346311542E-09	1.90126432564778E-10	1.10937666970378E-09	5.21802797136676E-10	2.029094320367E-11	2.1132484263286E-12	3.95607285574455E-11	1.20652014494064E-11
488190	4156690	70.7949981689453	1.43623503340166E-09	2.08681352687069E-10	1.2619276152748E-09	5.8869560667373E-10	2.40195888329167E-11	2.41578694462871E-12	4.69597185306428E-11	1.42536367817312E-11
488390	4156690	72.1460037231445	1.60235305039379E-09	2.28878163291545E-10	1.43516822816815E-09	6.64100575233522E-10	2.84244389558306E-11	2.76166987892092E-12	5.57185050781221E-11	1.68352613182809E-11
488590	4156690	88.9380035400391	1.78742947984209E-09	2.5084553185674E-10	1.63186349643778E-09	7.49097147038209E-10	3.3625643874035E-11	3.15714377804857E-12	6.60811906393923E-11	1.98795307454043E-11
488790	4156690	108.981002807617	1.99366594157395E-09	2.74721248812327E-10	1.85514100072649E-09	8.44901356906355E-10	3.97640613938636E-11	3.60936045192666E-12	7.8334291651923E-11	2.34678366970771E-11
488990	4156690	110.50700378418	2.22353547417679E-09	3.00652970174839E-10	2.10853702556508E-09	9.52882933011673E-10	4.70046652830462E-11	4.12650741959698E-12	9.28137665027079E-11	2.76954701632227E-11
489190	4156690	111.099998474121	2.4798187469688E-09	3.28799128017546E-10	2.39604819541715E-09	1.07458449923958E-09	5.55404762674056E-11	4.71795784065111E-12	1.09913124432466E-10	3.26738864587292E-11
489390	4156690	111.891998291016	2.76564517910471E-09	3.59329849328358E-10	2.722189219511E-09	1.21174298562537E-09	6.55970823910039E-11	5.39443885977903E-12	1.30092761020396E-10	3.85333096653162E-11
489590	4156690	111.607002258301	3.08453961665525E-09	3.92427900352835E-10	3.09205738167996E-09	1.366313487224E-09	7.74378253978827E-11	6.16822059424603E-12	1.53890680450811E-10	4.54257207555057E-11
489790	4156690	114.939002990723	3.44047542623049E-09	4.28289926070536E-10	3.51140441495079E-09	1.54049597475029E-09	9.13697409029353E-11	7.0533334751694E-12	1.8193477831912E-10	5.35282812370584E-11
489990	4156690	119.346000671387	3.83793484758587E-09	4.67128073109069E-10	3.98671648669939E-09	1.7367651752402E-09	1.07750344106507E-10	8.06581830527919E-12	2.14956873459483E-10	6.30472456093384E-11
490190	4156690	125.46199798584	4.28197713844637E-09	5.0917165848314E-10	4.52530303700988E-09	1.95790367429997E-09	1.26995348895931E-10	9.22400534311919E-12	2.53808689630318E-10	7.42224132898429E-11
490390	4156690	136.106002807617	4.7783155963605E-09	5.54668919032052E-10	5.13539520631782E-09	2.20703852766586E-09	1.49587425064144E-10	1.05488250250048E-11	2.99479997064141E-10	8.73321777354004E-11
490590	4156690	166.578994750977	5.33340433745885E-09	6.03888497853327E-10	5.8262546180727E-09	2.48768143805594E-09	1.76086093509952E-10	1.20641439716423E-11	3.53119130945057E-10	1.026992257719E-10
490790	4156690	170.651992797852	5.9545365535492E-09	6.57122899664641E-10	6.60829347944371E-09	2.80377427381734E-09	2.07138884353118E-10	1.37971800616764E-11	4.16056113484247E-10	1.20696986879159E-10
490990	4156690	169.246994018555	6.64995418632953E-09	7.14690183541547E-10	7.49320638224997E-09	3.15973767749006E-09	2.43493831180018E-10	1.57789236850412E-11	4.89828586475911E-10	1.41756833858404E-10
491190	4156690	190.296005249023	7.42897133613276E-09	7.7693691231411E-10	8.49411493264507E-09	3.56052510468784E-09	2.86013414496234E-10	1.80446135208301E-11	5.76210761192177E-10	1.66376125369797E-10
491390	4156690	210.147003173828	8.30211236322893E-09	8.44241565475494E-10	9.6257257455882E-09	4.01168197857294E-09	3.35690042641561E-10	2.06342700990836E-11	6.77245567534379E-10	1.95127141076138E-10
491590	4156690	215.561004638672	9.2812661178997E-09	9.17018695237682E-10	1.09045023935249E-08	4.51941035145267E-09	3.9366313742815E-10	2.3593293070057E-11	7.95280142023257E-10	2.28666950836567E-10
491790	4156690	222.399993896484	1.03798574556385E-08	9.95722911266736E-10	1.23488516264339E-08	5.09063860216056E-09	4.61237850009931E-10	2.69730936847414E-11	9.33004729882394E-10	2.67748217012733E-10
491990	4156690	246.279998779297	1.16130375738289E-08	1.08085342651455E-09	1.39793242569087E-08	5.7330967800775E-09	5.39905411859693E-10	3.08317824937553E-11	1.09349501004527E-09	3.13230946932559E-10
492190	4156690	260.977996826172	1.29978945859624E-08	1.1729586876681E-09	1.58188306362068E-08	6.45539726382173E-09	6.31365067053462E-10	3.52348982831556E-11	1.2802577354448E-09	3.66095156635864E-10
492390	4156690	273.658996582031	1.45536860483094E-08	1.27264153009243E-09	1.7892870404937E-08	7.26712090205946E-09	7.3754747416045E-10	4.02561829864444E-11	1.49727944378464E-09	4.27454384331507E-10
492590	4156690	297.130004882812	1.63020950078784E-08	1.38056596507156E-09	2.02297758861149E-08	8.17890911765949E-09	8.60639378058766E-10	4.597842411131E-11	1.74907781911927E-09	4.98569957867961E-10
492790	4156690	297.5830078125	1.82675102190913E-08	1.49746262932988E-09	2.28609677533586E-08	9.202559580061E-09	1.00310921243854E-09	5.24942707149712E-11	2.04075505200096E-09	5.80865773859984E-10
492990	4156690	286.933013916016	2.04773318760281E-08	1.62413382395368E-09	2.58212212102825E-08	1.03511254032101E-08	1.16773319474191E-09	5.99070367321294E-11	2.37805228237597E-09	6.75943355247682E-10
493190	4156690	298.253997802734	2.29623064012465E-08	1.76146363478067E-09	2.91489403718292E-08	1.16390205531604E-08	1.35762140586114E-09	6.83316211708055E-11	2.76740388828026E-09	7.8559695373951E-10
493390	4156690	302.610992431641	2.57568876340233E-08	1.91042579000775E-09	3.28864371940369E-08	1.30821254442899E-08	1.57624292164325E-09	7.78953142935981E-11	3.21598997387181E-09	9.11828089991291E-10
493590	4156690	305.707000732422	2.88996245868553E-08	2.07208925966343E-09	3.70802107565093E-08	1.46978912140502E-08	1.82744896367377E-09	8.87384552696522E-11	3.73178497966925E-09	1.05685895420127E-09
493790	4156690	306.631988525391	3.24335831977021E-08	2.24762811417976E-09	4.17812221107822E-08	1.65054451231096E-08	2.11549305121815E-09	1.01015065416612E-10	4.32359980254741E-09	1.22314406408756E-09
493990	4156690	309.528991699219	3.64067976577862E-08	2.43832878744311E-09	4.70451594980041E-08	1.85256908171791E-08	2.44504647655117E-09	1.14893278480635E-10	5.00111425352667E-09	1.41337920616997E-09
494190	4156690	306.778015136719	4.08727370079088E-08	2.64559724766536E-09	5.29326741940811E-08	2.07813979338042E-08	2.82120723344814E-09	1.30555538280951E-10	5.77489611560418E-09	1.63050664530489E-09
494390	4156690	314.420013427734	4.58908094013504E-08	2.87096830826738E-09	5.95095919197612E-08	2.3297284264041E-08	3.24950032916527E-09	1.48198494029708E-10	6.65640227513591E-09	1.87771534842776E-09
494590	4156690	312.460998535156	5.1526891580688E-08	3.11611313622743E-09	6.68470832296896E-08	2.61000819628296E-08	3.73586699900541E-09	1.68032484622946E-10	7.6579568462989E-09	2.15843479258414E-09
494790	4156690	312.951995849609	5.7853893970042E-08	3.3828474064957E-09	7.50217886319206E-08	2.92185878436645E-08	4.28664005714774E-09	1.90280554539792E-10	8.79270052400065E-09	2.47632078323988E-09
494990	4156690	308.204010009766	6.49523331160059E-08	3.67313688819018E-09	8.41158631280194E-08	3.26836829653962E-08	4.90850230922284E-09	2.1517685264389E-10	1.00745048225311E-08	2.8352314881451E-09
495190	4156690	302.963012695312	7.2910927824394E-08	3.98909912717268E-09	9.42169398839845E-08	3.65283205514912E-08	5.60842474045272E-09	2.42964233042697E-10	1.15178444095663E-08	3.23919174944604E-09
495390	4156690	299.227996826172	8.18272189183072E-08	4.33301121960514E-09	1.05417992431019E-07	4.07874812126519E-08	6.39358129266431E-09	2.73891242438979E-10	1.3137620536613E-08	3.69234394968775E-09
495590	4156690	281.282012939453	9.18082028830034E-08	4.707310406134E-09	1.17817076417747E-07	4.54980801308466E-08	7.27123657953446E-09	3.08208009002474E-10	1.49489285590125E-08	4.19888321344094E-09
495790	4156690	279.980987548828	1.0297098558552E-07	5.11459418657278E-09	1.31516932818179E-07	5.06988239695103E-08	8.24860357264435E-09	3.46161105063104E-10	1.69667630252934E-08	4.76297526502299E-09
495990	4156690	275.782012939453	1.15443451073664E-07	5.55761582778601E-09	1.46624434765571E-07	5.64300084373292E-08	9.33266854718441E-09	3.87987276297074E-10	1.92056547492234E-08	5.38865537889352E-09
496190	4156690	275.511993408203	1.29364956997372E-07	6.03927904830427E-09	1.63249862222088E-07	6.27332532346233E-08	1.05299813711026E-08	4.33905986075548E-10	2.167923585349E-08	6.07970731913324E-09
496390	4156690	274.932006835938	1.448870690925E-07	6.56263596643484E-09	1.8150599272355E-07	6.96511727588508E-08	1.18464104637897E-08	4.84110914492948E-10	2.43997311249698E-08	6.83952192937256E-09
496590	4156690	273.839996337891	1.62174337466358E-07	7.13086819883877E-09	2.01506997314389E-07	7.72269657650978E-08	1.32868624111387E-08	5.38759669830082E-10	2.73773767938238E-08	7.67093512342916E-09
496790	4156690	269.829986572266	1.81405182846659E-07	7.74727416770278E-09	2.23367158569887E-07	8.55039448422019E-08	1.48549695882206E-08	5.9796263217802E-10	3.06197724431456E-08	8.57604746882147E-09
496990	4156690	276.917999267578	2.02772828494257E-07	8.41525617692721E-09	2.47199380134692E-07	9.45249905573103E-08	1.65527508715023E-08	6.61771237867559E-10	3.41311763885575E-08	9.55602833745106E-09
497190	4156690	286.522003173828	2.26486403261608E-07	9.13830624139272E-09	2.73113542259419E-07	1.0433194926832E-07	1.83802527538654E-08	7.30165532654942E-10	3.79117603645352E-08	1.06109087054382E-08
497390	4156690	290.369995117188	2.52772307862715E-07	9.91998974419241E-09	3.01214755167122E-07	1.14964992706409E-07	2.0335181413988E-08	8.03041118108461E-10	4.19568457937898E-08	1.17393686131372E-08
497590	4156690	294.998992919922	2.81875940566675E-07	1.07639396876561E-08	3.31601573955239E-07	1.26461970480554E-07	2.24125402191425E-08	8.80196482053839E-10	4.62561509416485E-08	1.29385277998314E-08
497790	4156690	290.174011230469	3.14063772506779E-07	1.16738505669774E-08	3.64364207822107E-07	1.38857760306199E-07	2.46042897860196E-08	9.61321166180692E-10	5.07930847257414E-08	1.4203749351409E-08
497990	4156690	297.740997314453	3.49626008692592E-07	1.2653481403291E-08	3.99582879042664E-07	1.52183678120239E-07	2.68990508198263E-08	1.04598548725103E-09	5.55441291387344E-08	1.55284680370035E-08
498190	4156690	309.798004150391	3.88879986372187E-07	1.37066769174265E-08	4.37326457195717E-07	1.66466999097966E-07	2.92818723000625E-08	1.13363261086261E-09	6.04783571172743E-08	1.69040563667721E-08
498390	4156690	315.805999755859	4.32174488050543E-07	1.48374080234646E-08	4.7765153186227E-07	1.81730649193886E-07	3.17340889689015E-08	1.22357385204161E-09	6.55571355540163E-08	1.83197422193092E-08
498590	4156690	321.388000488281	4.79895190008379E-07	1.60498444438887E-08	5.20602110785873E-07	1.97993142844353E-07	3.42332921190299E-08	1.3149881300952E-09	7.07340632046692E-08	1.9762591940876E-08
498790	4156690	328.89599609375	5.32471451485403E-07	1.73484418350015E-08	5.66210145065816E-07	2.15268828252686E-07	3.67534357234163E-08	1.40692571333623E-09	7.59551896755933E-08	2.12175712891867E-08
498990	4156690	332.897003173828	5.90384680302682E-07	1.87380869354755E-08	6.14497090628921E-07	2.33568543587396E-07	3.92650969057811E-08	1.49831808284455E-09	8.11595541579687E-08	2.26676958404919E-08
499190	4156690	329.614013671875	6.54178468468884E-07	2.0224283121193E-08	6.65476700127705E-07	2.52900742833915E-07	4.17359031771458E-08	1.58799351838077E-09	8.62800702637994E-08	2.40942775718957E-08
499390	4156690	342.722991943359	7.24470647605938E-07	2.18133882363932E-08	7.19159206817082E-07	2.73273157167763E-07	4.41311312486114E-08	1.67469882473568E-09	9.12447668151213E-08	2.54772705440612E-08
499590	4156690	348.214996337891	8.01967327778269E-07	2.35129027717962E-08	7.75557000636716E-07	2.94695026763414E-07	4.64144722290682E-08	1.75712684720465E-09	9.5978373943407E-08	2.67957125979842E-08
499790	4156690	362.657012939453	8.87478860536203E-07	2.53318151043139E-08	8.34691805853045E-07	3.17179910716834E-07	4.85489469393053E-08	1.83394942606724E-09	1.00404220601318E-07	2.80282538007724E-08
499990	4156690	358.675994873047	9.8201784709341E-07	2.72823644030775E-08	8.96627260343169E-07	3.40758565626114E-07	5.04979426843893E-08	1.90385421574604E-09	1.04446384755074E-07	2.91537548767528E-08
500190	4156690	382.641998291016	1.08687323220425E-06	2.9381408171436E-08	9.61494852180898E-07	3.65489175453191E-07	5.22263327610813E-08	1.96558487579703E-09	1.08032014775851E-07	3.01519336093174E-08
500390	4156690	387.264007568359	1.20344141276393E-06	3.16476107076411E-08	1.02944725639209E-06	3.91438723117171E-07	5.37016288634909E-08	2.01798239588557E-09	1.11093719281983E-07	3.10040302656453E-08
500590	4156690	387.553985595703	1.33351727666207E-06	3.4106790969652E-08	1.10074332905889E-06	4.1871706767846E-07	5.48951095378528E-08	2.06002523117231E-09	1.13571907923482E-07	3.16934591111276E-08
500790	4156690	400.328002929688	1.47922974166208E-06	3.67907616141055E-08	1.17573705008123E-06	4.47472213879958E-07	5.57828649721646E-08	2.0908664640819E-09	1.15416958801458E-07	3.22064116700087E-08
500990	4156690	391.428985595703	1.6428857125506E-06	3.97347489306786E-08	1.25483954846096E-06	4.77874965561786E-07	5.63466990719702E-08	2.10986595430358E-09	1.16591089979268E-07	3.25323776708712E-08
501190	4156690	400.85400390625	1.82678944586508E-06	4.29744458299731E-08	1.33846251197386E-06	5.10096630670828E-07	5.6574835271992E-08	2.11661529898746E-09	1.17069824126262E-07	3.26645525911194E-08
501390	4156690	384.076995849609	2.03384761418318E-06	4.65564743661538E-08	1.42719872618075E-06	5.44380830958508E-07	5.64623826970862E-08	2.1109541255057E-09	1.16842956564852E-07	3.260010687068E-08
501590	4156690	393.743011474609	2.26739327806734E-06	5.05354148692994E-08	1.52176684266584E-06	5.8102168174557E-07	5.60115335255338E-08	2.09297684017496E-09	1.15914966108696E-07	3.23403000441357E-08
501790	4156690	372.921997070312	2.53117413811951E-06	5.49736222209037E-08	1.62300266979818E-06	6.20360534247621E-07	5.52314792742529E-08	2.06302951300709E-09	1.143048423829E-07	3.18904325649991E-08
501990	4156690	367.821990966797	2.82917921401699E-06	5.99381602054251E-08	1.73180980706461E-06	6.62766210202294E-07	5.4138050673782E-08	2.02169659153704E-09	1.12045340401604E-07	3.1259637959999E-08
502190	4156690	360.483001708984	3.16495620916999E-06	6.54887825524328E-08	1.84898357528912E-06	7.08563808884953E-07	5.27531040183944E-08	1.96977872355425E-09	1.09181709222977E-07	3.04605286953592E-08
502390	4156690	355.738006591797	3.54262513889738E-06	7.16956335030011E-08	1.97544375158212E-06	7.58129975600761E-07	5.11036917730153E-08	1.90826295391803E-09	1.05769973095538E-07	2.95087175218661E-08
502590	4156690	347.721008300781	3.96682895763471E-06	7.86375493394197E-08	2.11216676119473E-06	8.11867360644698E-07	4.92210668947329E-08	1.83828635272929E-09	1.01874868133111E-07	2.84222424560875E-08
502790	4156690	340.859008789062	4.44337672404034E-06	8.6411732732213E-08	2.26024129775268E-06	8.7023087378392E-07	4.71395788743092E-08	1.76109678923386E-09	9.75675537701592E-08	2.72209298159262E-08
502990	4156690	339.915985107422	4.97740359531562E-06	9.51041326008986E-08	2.42054977178161E-06	9.33593835571766E-07	4.48955214232822E-08	1.67801156852207E-09	9.29232237206879E-08	2.59257289806249E-08
503190	4156690	337.096984863281	5.57395358818863E-06	1.04796983893263E-07	2.59379845848562E-06	1.00226367833791E-06	4.25259902373089E-08	1.59037635713806E-09	8.80187381065925E-08	2.45580529884858E-08
503390	4156690	332.454986572266	6.23769912627443E-06	1.1556616053758E-07	2.78044667336644E-06	1.07645470939406E-06	4.00678038801069E-08	1.49952632849664E-09	8.29303864260373E-08	2.31391555341806E-08
503590	4156690	343.403991699219	6.97275680411245E-06	1.27477187469418E-07	2.98062116127147E-06	1.15625468276136E-06	3.75565319298428E-08	1.40675125858402E-09	7.77318726903976E-08	2.16895699061568E-08
503790	4156690	341.493011474609	7.78258011028738E-06	1.40581160642774E-07	3.19403085821435E-06	1.24159144617661E-06	3.50256634482917E-08	1.31326565883976E-09	7.24925914368839E-08	2.02286289205339E-08
503990	4156690	350.404998779297	8.66972363309001E-06	1.54911204080231E-07	3.41989296093629E-06	1.33220400973793E-06	3.25059371226864E-08	1.22018470932067E-09	6.7276238895933E-08	1.87740781786143E-08
504190	4156690	345.365997314453	9.63527423202301E-06	1.70472984050849E-07	3.65681560263313E-06	1.42759415924609E-06	3.00248428218722E-08	1.1285063402187E-09	6.21397795211914E-08	1.73417882736504E-08
504390	4156690	340.8330078125	1.06699275701853E-05	1.87103183239841E-07	3.9014457537193E-06	1.52644820970565E-06	2.76062937568394E-08	1.03909943255041E-09	5.71327662097512E-08	1.59455654810326E-08
504590	4156690	340.019012451172	1.17601382308741E-05	2.04566818387093E-07	4.14942465898098E-06	1.62704388898054E-06	2.52704596428578E-08	9.52697884876563E-10	5.22969941820398E-08	1.45970554230886E-08
504790	4156690	330.075012207031	1.28859461218398E-05	2.22523765048219E-07	4.39514286064919E-06	1.72714055205373E-06	2.30337442278131E-08	8.6989973029211E-10	4.7666454343435E-08	1.33057300269171E-08
504990	4156690	327.52099609375	1.40140025986774E-05	2.40419391884804E-07	4.6308259970428E-06	1.82357945023197E-06	2.09088860361104E-08	7.9117045441879E-10	4.32675423873907E-08	1.20789455280169E-08
505190	4156690	333.652008056641	1.50886789655582E-05	2.57347021355981E-07	4.84540514152501E-06	1.91178825598238E-06	1.89051591457762E-08	7.1685024416375E-10	3.9119474797885E-08	1.09220583421062E-08
505390	4156690	332.8330078125	1.60186424634458E-05	2.71840921904493E-07	5.02276196975877E-06	1.98501564224287E-06	1.70286496468917E-08	6.4716420994854E-10	3.52348614431992E-08	9.83858473324176E-09
505590	4156690	331.886993408203	1.66670231410274E-05	2.81723505911229E-07	5.14048979035722E-06	2.03378661262179E-06	1.52825838421725E-08	5.8223398518614E-10	3.16203860667733E-08	8.8303901657831E-09
505790	4156690	332.425994873047	1.68757403883026E-05	2.84492647044863E-07	5.17374641403742E-06	2.04754001141181E-06	1.36676872270071E-08	5.22090577752535E-10	2.82775503878542E-08	7.89789647950109E-09
505990	4156690	331.942993164062	1.65551757858695E-05	2.78741954154928E-07	5.10884712382166E-06	2.02044014545683E-06	1.21825555000766E-08	4.66687689008733E-10	2.5203443094681E-08	7.04029602299823E-09
506190	4156690	319.415008544922	1.57657385228612E-05	2.65446928036095E-07	4.95547126351554E-06	1.95660254138354E-06	1.0824022081795E-08	4.15914917947613E-10	2.23915015849608E-08	6.25576377543498E-09
506390	4156690	314.022003173828	1.46711262662776E-05	2.47221948036927E-07	4.73946325232135E-06	1.86702192189086E-06	9.58750993524441E-09	3.69610412815635E-10	1.98322411473423E-08	5.54166041026928E-09
506590	4156690	314.088012695312	1.34330231010853E-05	2.26652765974305E-07	4.4867941991638E-06	1.76272035302932E-06	8.46735866745518E-09	3.27572658285741E-10	1.75139328723478E-08	4.89472109953869E-09
506790	4156690	311.210998535156	1.21637251914776E-05	2.05544111417309E-07	4.2162457364904E-06	1.65162695369357E-06	7.45712077467469E-09	2.89571131781479E-10	1.54232176145147E-08	4.31122649391563E-09
506990	4156690	308.191986083984	1.09295198525879E-05	1.84970673029454E-07	3.93977819621141E-06	1.538743318829E-06	6.54982348470367E-09	2.55355727924275E-10	1.35456486311378E-08	3.78715384462292E-09
507190	4156690	305.308013916016	9.7659896769892E-06	1.65517730970181E-07	3.66474346223103E-06	1.42709564783583E-06	5.73819479511315E-09	2.2466498232149E-10	1.18661599302024E-08	3.31830750159918E-09
507390	4156690	304.851013183594	8.69021372367618E-06	1.47473644953058E-07	3.39566878961954E-06	1.31850131799067E-06	5.01485389056308E-09	1.97232941890053E-10	1.03694608391772E-08	2.90042881162177E-09
507590	4156690	302.942993164062	7.70843120142428E-06	1.30951201008493E-07	3.13537962100237E-06	1.21405151966012E-06	4.37246752197918E-09	1.72794840732504E-10	9.04035999553764E-09	2.5292863837947E-09
507790	4156690	299.674987792969	6.82059394041677E-06	1.15960076304816E-07	2.88566327265541E-06	1.11439701015017E-06	3.80387478445171E-09	1.51091657929225E-10	7.86402382166707E-09	2.20074812382592E-09
507990	4156690	296.680999755859	6.02307288306095E-06	1.02450220666306E-07	2.64765678683974E-06	1.01991576808604E-06	3.30218330405726E-09	1.3187363708143E-10	6.82617574982793E-09	1.91083676075946E-09
508190	4156690	296.006988525391	5.31029321548763E-06	9.03382812848736E-08	2.42207333819052E-06	9.30811566188341E-07	2.86084013704867E-09	1.14902815913006E-10	5.91324310548771E-09	1.65577073742532E-09
508390	4156690	277.398010253906	4.67573639329248E-06	7.95239523373374E-08	2.20933400365185E-06	8.47171963212161E-07	2.47368091341907E-09	9.99549121040488E-11	5.112458787058E-09	1.43199261576059E-09
508590	4156690	279.135009765625	4.11255722572105E-06	6.99001521482821E-08	2.00964432171739E-06	7.69002432520909E-07	2.134960519341E-09	8.68204979302199E-11	4.41192473018131E-09	1.23618680445812E-09
508790	4156690	279.782989501953	3.61396073520978E-06	6.13593213976686E-08	1.82303944949822E-06	6.96246682166289E-07	1.83936851853053E-09	7.53055975824434E-11	3.80064377428434E-09	1.0652884658549E-09
508990	4156690	271.699005126953	3.17342629951038E-06	5.37972396954677E-08	1.64941239969347E-06	6.28799283996606E-07	1.58203225203952E-09	6.5231842279791E-11	3.26852599696102E-09	9.16485313155356E-10
509190	4156690	269.06201171875	2.7848337424553E-06	4.71152392010682E-08	1.48853398612366E-06	5.66514286232138E-07	1.35851025196046E-09	5.64362729091228E-11	2.80637498599577E-09	7.87213817433921E-10
509390	4156690	262.358001708984	2.44252637495085E-06	4.12213819143196E-08	1.34006933365356E-06	5.09211923494718E-07	1.1647782849381E-09	4.87708837524221E-11	2.40585883875837E-09	6.75151165951895E-10
509590	4156690	259.200988769531	2.1413337616407E-06	3.60309699288437E-08	1.20359339142856E-06	4.56684540287245E-07	9.97210004907019E-10	4.21019724693427E-11	2.05946999582595E-09	5.7820411100021E-10
509790	4156690	267.118011474609	1.87656916874109E-06	3.14666310524602E-08	1.07860640470006E-06	4.08702227609448E-07	8.52553866377688E-10	3.63093187807202E-11	1.76047736918048E-09	4.94495645293695E-10
509990	4156690	263.924011230469	1.64401154850764E-06	2.7458142180821E-08	9.64549452963424E-07	3.65018315499856E-07	7.27907708698244E-10	3.12852962953411E-11	1.50287363208527E-09	4.22350342536976E-10
510190	4156690	254.850997924805	1.43987855149363E-06	2.39420962862223E-08	8.60819748543216E-07	3.25374678947291E-07	6.20692136831812E-10	2.69339610498231E-11	1.28132000085226E-09	3.60279014389861E-10
510390	4156690	233.580001831055	1.26079482388338E-06	2.08614801855029E-08	7.66785246445772E-07	2.89506738155411E-07	5.286235503573E-10	2.31700989023991E-11	1.09109032137551E-09	3.06963152456164E-10
510590	4156690	214.541000366211	1.1037583648871E-06	1.81652096953976E-08	6.81798139207719E-07	2.57148029248548E-07	4.49687515878219E-10	1.99182778306145E-11	9.28015879156824E-10	2.61239566132433E-10
510790	4156690	180.949005126953	9.66106727977066E-07	1.58076513129754E-08	6.05206901836198E-07	2.28034243276368E-07	3.82112999194349E-10	1.71119339390202E-11	7.8843199200905E-10	2.22085518942031E-10
510990	4156690	177.00700378418	8.45484191167834E-07	1.37481490213747E-08	5.36366679726989E-07	2.01906670719491E-07	3.24347818473477E-10	1.46924986960113E-11	6.69127138878354E-10	1.88604569094448E-10
511190	4156690	171.541000366211	7.39810580144473E-07	1.19505672146355E-08	4.74647930055647E-07	1.78515026247821E-07	2.7503556528594E-10	1.26085778727791E-11	5.67295134088865E-10	1.60013257303586E-10
511390	4156690	156.022994995117	6.47252135934703E-07	1.03828567173196E-08	4.19443336389499E-07	1.57619665316818E-07	2.32994136165342E-10	1.08151751725016E-11	4.8049065469304E-10	1.35628718475954E-10
511590	4156690	134.404006958008	5.66194621562568E-07	9.01664902733749E-09	3.70173090477774E-07	1.38993229772159E-07	1.97195966287881E-10	9.27299347014808E-12	4.06588279482264E-10	1.14857283587674E-10
511790	4156690	123.831001281738	4.9521872973797E-07	7.82687931175987E-09	3.26288688596971E-07	1.22421775958413E-07	1.66749963938079E-10	7.94778571858218E-12	3.43745066821237E-10	9.71840584389068E-11
511990	4156690	112.398002624512	4.33077766934538E-07	6.79143888263497E-09	2.87275420812786E-07	1.07705450131899E-07	1.40885117915035E-10	6.80975848510668E-12	2.90366603122855E-10	8.21634633446231E-11
512190	4156690	95.9260025024414	3.78677531575281E-07	5.89085692567486E-09	2.5265374178078E-07	9.46587790706939E-08	1.18935723804041E-10	5.83303645292718E-12	2.45076405433514E-10	6.94107089187012E-11
512390	4156690	69.0609970092773	3.3105826857639E-07	5.10801113549824E-09	2.21979715096337E-07	8.31106449230826E-08	1.00328148017683E-10	4.9951902557261E-12	2.0668850667904E-10	5.8594164130963E-11
512590	4156690	40.7439994812012	2.89378560594573E-07	4.4278652637992E-09	1.94844712736999E-07	7.29040085077238E-08	8.45690204034864E-11	4.27680610643254E-12	1.74183006743413E-10	4.9428543194494E-11
512790	4156690	30.9120006561279	2.52901003861045E-07	3.83723188559492E-09	1.70874529150823E-07	6.389543754113E-08	7.12347537447707E-11	3.66110278208253E-12	1.46684372875196E-10	4.16688578364014E-11
512990	4156690	22.30299949646	2.20979514475377E-07	3.32455903667751E-09	1.49728056717043E-07	5.59544918652996E-08	5.99622820632935E-11	3.13359378552573E-12	1.23442265264771E-10	3.5105073784684E-11
513190	4156690	1.98000001907349	1.93048111657007E-07	2.87973868974606E-09	1.31095645454861E-07	4.89630087078091E-08	5.04409057132856E-11	2.68178921703628E-12	1.03814655615777E-10	2.95574057573778E-11
513390	4156690	0	1.68611030918962E-07	2.49393530704234E-09	1.14697253607796E-07	4.28143253193783E-08	4.24051332250771E-11	2.2949288316027E-12	8.72530104553407E-11	2.48721840360752E-11
513590	4156690	0	1.47234025729632E-07	2.15943316510935E-09	1.00280475315626E-07	3.74124692634297E-08	3.56284236280883E-11	1.96375094989619E-12	7.32893395117738E-11	2.09182429935896E-11
513790	4156690	0	1.28536730003555E-07	1.86950089023114E-09	8.76185137117276E-08	3.26713400200362E-08	2.99177340742041E-11	1.68029425455491E-12	6.15249123401158E-11	1.75837770931518E-11
513990	4156690	0	1.12185958795505E-07	1.61827077313251E-09	7.65081519171142E-08	2.85138992858137E-08	2.51087752066492E-11	1.43772011489959E-12	5.16204408739748E-11	1.47736015170372E-11
514190	4156690	NaN	9.78898394179634E-08	1.40063202435225E-09	6.67677653714582E-08	2.48713851125476E-08	2.10618970427813E-11	1.23015818930114E-12	4.32875677360839E-11	1.24067768822542E-11
514390	4156690	NaN	8.53926717619369E-08	1.21213617645155E-09	5.82354042607696E-08	2.16825591193304E-08	1.76585278116086E-11	1.0525700707984E-12	3.62814992121986E-11	1.04145513890817E-11
514590	4156690	NaN	7.44704312648876E-08	1.04891407180772E-09	5.07669690958071E-08	1.8892994742696E-08	1.47981039917616E-11	9.00636542529442E-13	3.03946553751357E-11	8.73859060731308E-12
514790	4156690	NaN	6.49268345755249E-08	9.07602514434996E-10	4.42344924007258E-08	1.64544099757556E-08	1.23954238341334E-11	7.7065680285295E-13	2.54511966114753E-11	7.32944894706256E-12
482590	4156890	176.522003173828	6.50084104354026E-11	1.3299131904521E-11	3.42400472398496E-11	2.08639111140756E-11	2.2496426047754E-13	6.27367607364887E-14	3.7534604345633E-13	1.45833010871181E-13
482790	4156890	198.419006347656	7.32587047662519E-11	1.48577856231365E-11	3.91905080516005E-11	2.36472411873338E-11	2.66532229351377E-13	7.20669848025611E-14	4.48802287802122E-13	1.72207492687357E-13
482990	4156890	198.011001586914	8.25294385396907E-11	1.6591106851205E-11	4.48461171185201E-11	2.6796709489946E-11	3.15844424705736E-13	8.27577331926108E-14	5.36557045040404E-13	2.03381120074476E-13
483190	4156890	202.925003051758	9.29422387442844E-11	1.85174816909081E-11	5.1305760673724E-11	3.03597494486305E-11	3.74350622040183E-13	9.50040445901266E-14	6.41375452961585E-13	2.40231975209292E-13
483390	4156890	219.74299621582	1.04632547532162E-10	2.0657062688547E-11	5.86819771097727E-11	3.43898487496969E-11	4.43772190921532E-13	1.0902857439774E-13	7.66553064910762E-13	2.83799379315853E-13
483590	4156890	233.352996826172	1.17751095432734E-10	2.30318847434246E-11	6.71028116910535E-11	3.8947292381514E-11	5.26152674805345E-13	1.25085263280151E-13	9.16016508808168E-13	3.35313336448788E-13
483790	4156890	261.579010009766	1.32465551225331E-10	2.56660471537265E-11	7.67139271726557E-11	4.41000403080837E-11	6.23917952257506E-13	1.43464068901693E-13	1.09444311107082E-12	3.96229798002115E-13
483990	4156890	288.967987060547	1.48962332216089E-10	2.85858668284515E-11	8.76809925547294E-11	4.9924686973643E-11	7.39947328148225E-13	1.64495948434241E-13	1.30740278346731E-12	4.68272027490531E-13
484190	4156890	295.712005615234	1.67448600902911E-10	3.18200409021254E-11	1.00192393208659E-10	5.65075427152069E-11	8.77657736613493E-13	1.88558646814814E-13	1.56152635932359E-12	5.53479585809063E-13
484390	4156890	296.109008789062	1.88154488067143E-10	3.53998373829788E-11	1.14462304484469E-10	6.39458641972669E-11	1.04110340520646E-12	2.16083322439615E-13	1.8647051921556E-12	6.54266239248368E-13
484590	4156890	283.161987304688	2.11335543104087E-10	3.93592810858117E-11	1.30734176283138E-10	7.23492300198388E-11	1.23509375889561E-12	2.475621239427E-13	2.22632770096235E-12	7.73488384259925E-13
484790	4156890	262.420013427734	2.37275457817822E-10	4.37353608205914E-11	1.49284683548559E-10	8.1841097946159E-11	1.4653329471195E-12	2.83556998105772E-13	2.65755955597705E-12	9.14525973481379E-13
484990	4156890	221.481994628906	2.66289078624586E-10	4.85682289148118E-11	1.70428203821577E-10	9.25605472801443E-11	1.73858455393924E-12	3.24709534314843E-13	3.17167536060125E-12	1.08137788763079E-12
485190	4156890	212.291000366211	2.98725752170357E-10	5.39014032468147E-11	1.94521891673947E-10	1.0466423808298E-10	2.06286610278091E-12	3.71752150047604E-13	3.78445106904158E-12	1.27877443220418E-12
485390	4156890	229.055999755859	3.34973055565556E-10	5.97819861259186E-11	2.21971428933496E-10	1.18328624865236E-10	2.44767876322767E-12	4.25521000864993E-13	4.51462797962854E-12	1.51231012127365E-12
485590	4156890	215.981994628906	3.75460979323103E-10	6.62609300836501E-11	2.53237546635571E-10	1.33752478598924E-10	2.90427877924607E-12	4.8697130032637E-13	5.38446117208022E-12	1.78860067147882E-12
485790	4156890	180.466995239258	4.20666596059984E-10	7.33933057485761E-11	2.88843409873166E-10	1.51159721218972E-10	3.44599742089499E-12	5.57194760480988E-13	6.42036705866884E-12	2.1154678919581E-12
485990	4156890	187.110000610352	4.71119226468646E-10	8.12384734617398E-11	3.29382942863775E-10	1.70802537519954E-10	4.08861672069682E-12	6.37437897271636E-13	7.65368650632287E-12	2.50215592095546E-12
486190	4156890	149.302001953125	5.27406303036123E-10	8.98603729103625E-11	3.75530301901698E-10	1.92964976546891E-10	4.85081323389071E-12	7.29124767347509E-13	9.1215857293902E-12	2.95958732850266E-12
486390	4156890	120.985000610352	5.90179972716034E-10	9.93278527979466E-11	4.28050609437494E-10	2.17967033380835E-10	5.75468047220698E-12	8.33883544898123E-13	1.08681179794595E-11	3.50066476967051E-12
486590	4156890	73.1490020751953	6.60164655117138E-10	1.09714939073759E-10	4.87812548124559E-10	2.46169362287684E-10	6.82634205183668E-12	9.53575594480176E-13	1.2945472268582E-11	4.1406241728445E-12
486790	4156890	69.7699966430664	7.38165436843622E-10	1.21101141521214E-10	5.55802151927853E-10	2.77978446060204E-10	8.09667232314947E-12	1.09032933208344E-12	1.54154422795899E-11	4.89744995714899E-12
486990	4156890	73.7750015258789	8.25077245935015E-10	1.33571765942902E-10	6.33137463202766E-10	3.13852081162409E-10	9.60214204724445E-12	1.24657907897556E-12	1.83511522212306E-11	5.79236219712959E-12
487190	4156890	72.9779968261719	9.21895772032375E-10	1.47218264200388E-10	7.21086621669016E-10	3.54306124689926E-10	1.1385809838489E-11	1.42510963678249E-12	2.18390825156906E-11	6.85038766660293E-12
487390	4156890	72.0080032348633	1.02972969437422E-09	1.6213867891735E-10	8.21087767192037E-10	3.99921955966356E-10	1.34984838653055E-11	1.6291088067504E-12	2.59814450453974E-11	8.10102960894867E-12
487590	4156890	71.2979965209961	1.14981449659256E-09	1.78438042001194E-10	9.34771436907358E-10	4.51354807995451E-10	1.6000080367299E-11	1.86222647084106E-12	3.08989646526459E-11	9.57905028374188E-12
487790	4156890	70.4089965820312	1.28352815662319E-09	1.96228386523309E-10	1.06398591998233E-09	5.09342917814162E-10	1.89612082290866E-11	2.12863395780466E-12	3.67341317706601E-11	1.1325378918841E-11
487990	4156890	71.2190017700195	1.43240925873708E-09	2.15629707144556E-10	1.21082591135697E-09	5.74718473835817E-10	2.24650247384026E-11	2.43311016790474E-12	4.3655004326678E-11	1.3388185281959E-11
488190	4156890	71.7399978637695	1.5981773918963E-09	2.36770316493491E-10	1.37766469027103E-09	6.4841944736849E-10	2.66093936734566E-11	2.78112723185278E-12	5.18596413914315E-11	1.58241207871341E-11
488390	4156890	70.1340026855469	1.78275657726972E-09	2.59787405945602E-10	1.56719053387646E-09	7.31503082146899E-10	3.15093979684703E-11	3.17895148726934E-12	6.15812682097415E-11	1.86997652080149E-11
488590	4156890	92.5449981689453	1.98830122320929E-09	2.84827656977158E-10	1.78244542175074E-09	8.2516024219981E-10	3.73002596059998E-11	3.63375929421565E-12	7.30942834478452E-11	2.20933080993515E-11
488790	4156890	110.140998840332	2.21722626767603E-09	3.12047946998309E-10	2.02687017524284E-09	9.30732140592182E-10	4.41407270786823E-11	4.15376950481566E-12	8.67212342416362E-11	2.60964996322351E-11
488990	4156890	111.963996887207	2.47224350283631E-09	3.41616203675545E-10	2.30436083461262E-09	1.04973121571882E-09	5.22169978306871E-11	4.74839458656793E-12	1.02840899977716E-10	3.0816909762657E-11
489190	4156890	112.902000427246	2.75640030351406E-09	3.73712326474709E-10	2.61932393067468E-09	1.18386165162091E-09	6.17472531003565E-11	5.42841398439079E-12	1.21897643641726E-10	3.63805405750755E-11
489390	4156890	113.750999450684	3.0731247303003E-09	4.08529300670872E-10	2.97674115944489E-09	1.33504341223864E-09	7.29868892944657E-11	6.20617243026789E-12	1.44412206366959E-10	4.29348404629286E-11
489590	4156890	113.695999145508	3.42627669726457E-09	4.46274152944521E-10	3.38224179426082E-09	1.50543896420754E-09	8.62345331919888E-11	7.09579907276622E-12	1.70994140580113E-10	5.06521690373654E-11
489790	4156890	116.404998779297	3.82020632104352E-09	4.87169264773441E-10	3.84218356656925E-09	1.69748328240157E-09	1.01838952422161E-10	8.11346067052537E-12	2.02356095378168E-10	5.97337792642206E-11
489990	4156890	121.206001281738	4.25982039813016E-09	5.31454156769077E-10	4.36374285252806E-09	1.91391751252505E-09	1.20206974841182E-10	9.27765464288774E-12	2.39330187047799E-10	7.0414382977984E-11
490190	4156890	143.52099609375	4.75065761758884E-09	5.79387235374304E-10	4.95501506128258E-09	2.15782628808634E-09	1.41812526913398E-10	1.06095347945786E-11	2.82886705979898E-10	8.29673612621777E-11
490390	4156890	155.511993408203	5.2989738642429E-09	6.3124819344789E-10	5.6251261815104E-09	2.43267948949056E-09	1.67206927418872E-10	1.21332885328124E-11	3.34155428449373E-10	9.77107048632968E-11
490590	4156890	167.339996337891	5.91183823326406E-09	6.87339196111914E-10	6.38435628758105E-09	2.74237753755247E-09	1.97030553812203E-10	1.38765251914412E-11	3.94449807957424E-10	1.15013727965043E-10
490790	4156890	171.567001342773	6.59724210851207E-09	7.4798857405618E-10	7.24427630878111E-09	3.09130307501109E-09	2.32026051863268E-10	1.58707632860043E-11	4.6529434555745E-10	1.35304699411233E-10
490990	4156890	180.589996337891	7.36422144003322E-09	8.13553371397389E-10	8.21789865275045E-09	3.48437690988202E-09	2.73053195729224E-10	1.81519436123248E-11	5.48455419166232E-10	1.59079412088069E-10
491190	4156890	196.856994628906	8.22299426685788E-09	8.84422579282211E-10	9.31984283966418E-09	3.92711981029877E-09	3.21105549746807E-10	2.07610100123913E-11	6.45975860004371E-10	1.86910797762687E-10
491390	4156890	211.882995605469	9.18511472812015E-09	9.61020071745484E-10	1.05665169971848E-08	4.42571982747429E-09	3.77329033783224E-10	2.37445185187393E-11	7.60213527506813E-10	2.19459625303787E-10
491590	4156890	220.229995727539	1.02636460300333E-08	1.04381006418537E-09	1.19763162716261E-08	4.98710733333889E-09	4.43042550990764E-10	2.71553799169462E-11	8.9388413047845E-10	2.57486425295898E-10
491790	4156890	224.057006835938	1.14733528127429E-08	1.13330152171822E-09	1.35698383929448E-08	5.61903557054843E-09	5.19760702317738E-10	3.1053626714289E-11	1.0501084366788E-09	3.01864598743072E-10
491990	4156890	232.343002319336	1.28309152002774E-08	1.23005331914378E-09	1.53701171350283E-08	6.33016813587715E-09	6.09218647800631E-10	3.55072541195461E-11	1.23246396502284E-09	3.53594771333924E-10
492190	4156890	238.682006835938	1.43551660287199E-08	1.33467980564818E-09	1.74028738710541E-08	7.13017324675129E-09	7.13399088995636E-10	4.05931246441249E-11	1.44504112643507E-09	4.1382037660989E-10
492390	4156890	256.830993652344	1.6067353253697E-08	1.44785646984051E-09	1.96967870093738E-08	8.02982451844333E-09	8.34561288839294E-10	4.63979256895751E-11	1.69250362122912E-09	4.83844409168405E-10
492590	4156890	271.954010009766	1.79914294294875E-08	1.57032733767901E-09	2.22837788968319E-08	9.04110914819696E-09	9.75271944955667E-10	5.30192120723629E-11	1.98015270789217E-09	5.65147269034354E-10
492790	4156890	295.221008300781	2.01543695486789E-08	1.70291262009242E-09	2.51993189933086E-08	1.01773421249069E-08	1.13843759150323E-09	6.05664839197903E-11	2.31399469272405E-09	6.59405487911198E-10
492990	4156890	295.298004150391	2.25865180410109E-08	1.84651423853253E-09	2.84827414367003E-08	1.14532842670281E-08	1.32733803444304E-09	6.9162212168255E-11	2.7008106691188E-09	7.68511014745452E-10
493190	4156890	302.494995117188	2.53219687642848E-08	2.00212538085029E-09	3.21775746441898E-08	1.28852671794631E-08	1.54566027048011E-09	7.89429712458321E-11	3.1482271611862E-09	8.94590820352375E-10
493390	4156890	305.213012695312	2.83989771414076E-08	2.17084232673561E-09	3.63318793623695E-08	1.44913227076277E-08	1.79753191611126E-09	9.00605919937122E-11	3.66478584532941E-09	1.04002627188918E-09
493590	4156890	307.678985595703	3.18604018718176E-08	2.35387036507386E-09	4.099859012233E-08	1.62913098329864E-08	2.08755286123629E-09	1.02683061167187E-10	4.26000995775104E-09	1.20747144048451E-09
493790	4156890	311.821990966797	3.5754185436288E-08	2.55253548833266E-09	4.62358546195853E-08	1.83070445162394E-08	2.42082406299875E-09	1.16995450111458E-10	4.94446439615505E-09	1.39986975462944E-09
493990	4156890	317.160003662109	4.01338649185071E-08	2.7682928392384E-09	5.21073627539592E-08	2.05624237281483E-08	2.80297141505128E-09	1.3320061316769E-10	5.72980570068852E-09	1.6204677949569E-09
494190	4156890	313.864013671875	4.50591217022489E-08	3.00273599432036E-09	5.86826620126395E-08	2.30835450872924E-08	3.24016249567336E-09	1.51519606448077E-10	6.62881748261309E-09	1.87282501653849E-09
494390	4156890	320.928009033203	5.05963476297137E-08	3.25760800416382E-09	6.60374284102608E-08	2.58988115909871E-08	3.73911369772583E-09	1.72191818110073E-10	7.65542580080182E-09	2.16081793066497E-09
494590	4156890	318.648010253906	5.68192488747934E-08	3.53481064089771E-09	7.42537008795475E-08	2.90390220130644E-08	4.30708462014593E-09	1.95474599844173E-10	8.82468816506232E-09	2.4886369119119E-09
494790	4156890	312.432006835938	6.38094726458292E-08	3.8364124110431E-09	8.34200543020936E-08	3.25374383780621E-08	4.95185627037338E-09	2.21642339549387E-10	1.01527489508933E-08	2.86077366900605E-09
494990	4156890	313.765991210938	7.16572773453743E-08	4.16465857619307E-09	9.36317101409769E-08	3.64298322138936E-08	5.68168917455844E-09	2.50984846238604E-10	1.16567531301632E-08	3.28199713349408E-09
495190	4156890	314.135986328125	8.04621964955674E-08	4.52197240864495E-09	1.04990533000456E-07	4.07544840485437E-08	6.50525708479709E-09	2.8380472563799E-10	1.33547094760571E-08	3.75731518045386E-09
495390	4156890	306.053009033203	9.03337297656879E-08	4.91096345157638E-09	1.17604913717557E-07	4.55521464673342E-08	7.43155203319779E-09	3.20413982055344E-10	1.5265293939444E-08	4.29191988222587E-09
495590	4156890	301.360992431641	1.0139204237284E-07	5.33442986271063E-09	1.31589510474435E-07	5.08659521746324E-08	8.46975583721628E-09	3.6112933656008E-10	1.74075836460565E-08	4.89111338258541E-09
495790	4156890	288.921997070312	1.13768674312452E-07	5.79535805021764E-09	1.47064823218145E-07	5.67412602025691E-08	9.62907376353576E-09	4.06266196727458E-10	1.98007122709413E-08	5.56021188745582E-09
495990	4156890	290.100006103516	1.27607250210895E-07	6.29691694181684E-09	1.64156576984787E-07	6.32254297638946E-08	1.09185263318831E-08	4.5613118836626E-10	2.24634384439901E-08	6.30442548847564E-09
496190	4156890	286.769012451172	1.43064200673427E-07	6.84245042155488E-09	1.82994890902489E-07	7.03675156370354E-08	1.2346696034664E-08	5.11013116812421E-10	2.54136205033689E-08	7.12871194618257E-09
496390	4156890	268.369995117188	1.60309500754956E-07	7.43547300898509E-09	2.03713213755171E-07	7.82178814392589E-08	1.3921427233437E-08	5.71172528656346E-10	2.86675936173108E-08	8.03760350084285E-09
496590	4156890	282.329986572266	1.79527427192594E-07	8.07964943331266E-09	2.26447007431997E-07	8.6827711664731E-08	1.56494784164667E-08	6.36829150270397E-10	3.22394486458943E-08	9.03500601231482E-09
496790	4156890	280.091003417969	2.00917365399131E-07	8.77877049411447E-09	2.5133217550557E-07	9.62484294298058E-08	1.75361294305248E-08	7.08147739827484E-10	3.61402174680856E-08	1.01239720789072E-08
496990	4156890	282.074005126953	2.2469473698634E-07	9.53673584600449E-09	2.78503255877899E-07	1.06531033569215E-07	1.95847491841844E-08	7.85222890829887E-10	4.03769756410869E-08	1.13064514182501E-08
497190	4156890	293.5	2.51091966159043E-07	1.03575343673491E-08	3.08091341086536E-07	1.17725335974328E-07	2.17963326995486E-08	8.68063241009077E-10	4.49518805889253E-08	1.25830236791776E-08
497390	4156890	296.071990966797	2.80359669341012E-07	1.12452111997199E-08	3.4022181544263E-07	1.2987912434608E-07	2.4169019235713E-08	9.56574312637945E-10	4.98611714811699E-08	1.39526200678813E-08
497590	4156890	299.47900390625	3.12768225364627E-07	1.22038491781109E-08	3.75011997294294E-07	1.43037299958317E-07	2.6697609669508E-08	1.05054160887646E-09	5.5094167016222E-08	1.54122446053351E-08
497790	4156890	300.402008056641	3.48609763461927E-07	1.3237554799742E-08	4.12568743837087E-07	1.57241004834232E-07	2.93731047605538E-08	1.14961451254408E-09	6.06323063239044E-08	1.69567074325419E-08
497990	4156890	302.278991699219	3.88200673085131E-07	1.43504447354914E-08	4.52986126025126E-07	1.72526774568527E-07	3.21822904534714E-08	1.25329189946671E-09	6.64482872773861E-08	1.85783852604873E-08
498190	4156890	311.720001220703	4.3188494187034E-07	1.55466542941576E-08	4.96343377066528E-07	1.88925803893673E-07	3.51074000595777E-08	1.36091052318053E-09	7.25053641409119E-08	2.02670261972127E-08
498390	4156890	306.298004150391	4.80038518320581E-07	1.68303663631604E-08	5.42703307055553E-07	2.06463393490989E-07	3.81258856733802E-08	1.47163733457605E-09	7.87568716850934E-08	2.20096176461056E-08
498590	4156890	322.798004150391	5.33074988213131E-07	1.82058786816536E-08	5.92111425095154E-07	2.25158676527078E-07	4.12103320076678E-08	1.58446706383076E-09	8.51460445347793E-08	2.37903365238398E-08
498790	4156890	327.946990966797	5.91452844652353E-07	1.96776868824041E-08	6.44596037983033E-07	2.45024707509804E-07	4.43285439720774E-08	1.69822532610494E-09	9.16061973362082E-08	2.55905994187389E-08
498990	4156890	339.575988769531	6.55684691501555E-07	2.12506370452297E-08	7.00169615618721E-07	2.66069052526219E-07	4.74438358905108E-08	1.81157961847319E-09	9.80613227212773E-08	2.73892295698708E-08
499190	4156890	342.209991455078	7.26348680904907E-07	2.29301298315886E-08	7.58831707310987E-07	2.88294971871924E-07	5.05155421254243E-08	1.92305796487704E-09	1.04427148737663E-07	2.91627515610297E-08
499390	4156890	352.778991699219	8.04102455413078E-07	2.47223938484779E-08	8.20573665122969E-07	3.11703298752222E-07	5.3499758929832E-08	2.0310758901417E-09	1.10612675936659E-07	3.08858195956367E-08
499590	4156890	359.522003173828	8.89699777256338E-07	2.6634824653882E-08	8.85385364443931E-07	3.36295080352072E-07	5.63503138690901E-08	2.13397125106288E-09	1.16522186798528E-07	3.25317770605534E-08
499790	4156890	371.904998779297	9.84009898359981E-07	2.86764040877067E-08	9.53264007308988E-07	3.6207502152641E-07	5.90199440802161E-08	2.23004668555104E-09	1.22057688305122E-07	3.40733367890099E-08
499990	4156890	379.18701171875	1.08803951278536E-06	3.08581796515986E-08	1.02422493471437E-06	3.89055691533476E-07	6.14616472227616E-08	2.31761765812832E-09	1.27121713624927E-07	3.54833608637099E-08
500190	4156890	384.567993164062	1.20295880265745E-06	3.31938458513E-08	1.09831472119732E-06	4.17262619206488E-07	6.36301541547112E-08	2.39506516291016E-09	1.31620376051255E-07	3.67357108741195E-08
500390	4156890	392.735992431641	1.33033920344843E-06	3.57039184619649E-08	1.17568721819922E-06	4.4676439065509E-07	6.54834570392713E-08	2.46089060668199E-09	1.3546653785338E-07	3.78061303117856E-08
500590	4156890	400.153991699219	1.47203349254288E-06	3.84139899029934E-08	1.25657687493095E-06	4.77661911249838E-07	6.69843151990268E-08	2.51376937474355E-09	1.38582933889649E-07	3.86731139766006E-08
500790	4156890	404.371002197266	1.63010088057469E-06	4.13535860796487E-08	1.34128224163919E-06	5.10081724996977E-07	6.81016565068597E-08	2.55260066619935E-09	1.40905078794671E-07	3.93187171304223E-08
500990	4156890	415.18701171875	1.8072183148252E-06	4.45633767488043E-08	1.43027793908313E-06	5.44221012981975E-07	6.88117922935395E-08	2.57655078995134E-09	1.42383787485111E-07	3.97292570917177E-08
501190	4156890	420.601013183594	2.00657173056548E-06	4.80934439513667E-08	1.52419564369371E-06	5.80339627973339E-07	6.90993709506387E-08	2.58508700333769E-09	1.42987153783505E-07	3.98958638852173E-08
501390	4156890	411.734008789062	2.23141100706301E-06	5.19956820514571E-08	1.62370125172499E-06	6.18710929465095E-07	6.89580087911348E-08	2.57799927881946E-09	1.42701860959167E-07	3.98148444897157E-08
501590	4156890	402.161987304688	2.48514522950862E-06	5.63255527300065E-08	1.72951342402885E-06	6.59629596459154E-07	6.83905579770921E-08	2.55540979120109E-09	1.41533738784047E-07	3.94878378372378E-08
501790	4156890	388.102996826172	2.77203223263044E-06	6.11539329989903E-08	1.84260350271556E-06	7.03491312936392E-07	6.74089931822877E-08	2.51776861650861E-09	1.39507529865334E-07	3.89217495595542E-08
501990	4156890	378.364013671875	3.09685770399134E-06	6.65615649268893E-08	1.96408960445176E-06	7.50751020824482E-07	6.60339240913173E-08	2.46583577178133E-09	1.36665880479577E-07	3.81284706227473E-08
502190	4156890	364.084014892578	3.46493728302393E-06	7.2638997973274E-08	2.09522356085917E-06	8.01918174343028E-07	6.42937659218121E-08	2.40065126670853E-09	1.33067621979266E-07	3.71243986347822E-08
502390	4156890	362.036010742188	3.88182769775305E-06	7.94814061832451E-08	2.23730323452707E-06	8.57521800023543E-07	6.22236211303742E-08	2.32349490237523E-09	1.28785453143819E-07	3.59297924306029E-08
502590	4156890	353.364013671875	4.35215422260044E-06	8.71678883909848E-08	2.39136688564417E-06	9.17987019477315E-07	5.98639416946151E-08	2.23583748246115E-09	1.23903167951424E-07	3.456799955067E-08
502790	4156890	354.572998046875	4.88118349266406E-06	9.57889277734757E-08	2.55855131664986E-06	9.83781794632561E-07	5.72590527707618E-08	2.13928836956716E-09	1.18512594925872E-07	3.30646043897717E-08
502990	4156890	362.582000732422	5.47409276664683E-06	1.05433364093727E-07	2.73988275384734E-06	1.05533317004734E-06	5.44556205954213E-08	2.03554055386161E-09	1.12710420566842E-07	3.14465437151441E-08
503190	4156890	348.671997070312	6.13780393818517E-06	1.16215923331776E-07	2.93647734575882E-06	1.13311720959895E-06	5.15011444637712E-08	1.92631632459361E-09	1.06595063336861E-07	2.97412360621704E-08
503390	4156890	343.838012695312	6.87869324115181E-06	1.28239855584843E-07	3.14912649228299E-06	1.21748552567308E-06	4.84425446674143E-08	1.81331650470335E-09	1.00263746263036E-07	2.79757665266607E-08
503590	4156890	364.343994140625	7.70164422746442E-06	1.41584702988878E-07	3.37811636369744E-06	1.30859235805144E-06	4.53249046094299E-08	1.69817528544361E-09	9.38098890241802E-08	2.61761605697113E-08
503790	4156890	353.489990234375	8.61058360430882E-06	1.56310298584805E-07	3.62320009847222E-06	1.40638710789892E-06	4.21904096157004E-08	1.58242211850686E-09	8.73209077868815E-08	2.43667713606338E-08
503990	4156890	360.240997314453	9.60809205341415E-06	1.72450142669061E-07	3.88347245647953E-06	1.51056489093906E-06	3.90775083411107E-08	1.46745159121746E-09	8.08764765045522E-08	2.25697956116217E-08
504190	4156890	356.683990478516	1.06950810018418E-05	1.90005710528824E-07	4.15726541025165E-06	1.62052523776211E-06	3.60203065804603E-08	1.35450163522989E-09	7.45472700309278E-08	2.08049235697168E-08
504390	4156890	346.385009765625	1.18706590306252E-05	2.08943609053365E-07	4.44209515781866E-06	1.73535116264457E-06	3.30481889959153E-08	1.24463991497522E-09	6.83941797406191E-08	1.90891205798053E-08
504590	4156890	335.305999755859	1.31323537602344E-05	2.29198612804274E-07	4.73470568151768E-06	1.85382681509285E-06	3.01856527069649E-08	1.13875799504378E-09	6.24679681356468E-08	1.74365310164699E-08
504790	4156890	324.221008300781	1.44676246117427E-05	2.50540220054223E-07	5.02987319357884E-06	1.97392086371528E-06	2.74523273926512E-08	1.03757168342406E-09	5.6809310850292E-08	1.58584896983122E-08
504990	4156890	334.906005859375	1.58401963293223E-05	2.72358352961329E-07	5.31852037394725E-06	2.09196918793615E-06	2.48631521188109E-08	9.41627232146995E-10	5.14491632328863E-08	1.43636238569583E-08
505190	4156890	343.888000488281	1.72010203578523E-05	2.93838874740816E-07	5.58963207621704E-06	2.20347814536128E-06	2.24286759755863E-08	8.51312289756875E-10	4.6409383175859E-08	1.29580266911974E-08
505390	4156890	341.032012939453	1.8454879136408E-05	3.13444000137137E-07	5.82562819481405E-06	2.30112312597464E-06	2.01554492041973E-08	7.66870125734064E-10	4.17035415615922E-08	1.16454831809928E-08
505590	4156890	336.597991943359	1.94139093918265E-05	3.28182811961771E-07	5.99575872345033E-06	2.37189942608539E-06	1.80464732874556E-08	6.88415570384396E-10	3.73378554566488E-08	1.04277297803245E-08
505790	4156890	347.605987548828	1.97756880873193E-05	3.33269285044902E-07	6.05311685745783E-06	2.39582606955372E-06	1.61016824603657E-08	6.15952281884631E-10	3.33121861756609E-08	9.30473232318614E-09
505990	4156890	333.277008056641	1.93144780822974E-05	3.2514798666473E-07	5.96355502042216E-06	2.35831155199449E-06	1.43184326658636E-08	5.49390298953745E-10	2.96210527532692E-08	8.27496823387953E-09
506190	4156890	329.834014892578	1.81727223632586E-05	3.06101349918079E-07	5.74946661167139E-06	2.26889350076584E-06	1.26919786380235E-08	4.88563181364236E-10	2.62546207842903E-08	7.3357018889861E-09
506390	4156890	322.128997802734	1.66878566094674E-05	2.81501947649494E-07	5.4633978779291E-06	2.14996258441183E-06	1.12159243624578E-08	4.33244209309735E-10	2.31996360490564E-08	6.48324461540078E-09
506590	4156890	323.915985107422	1.51062182559777E-05	2.55285142550767E-07	5.14467377389773E-06	2.01822102631046E-06	9.8826364522681E-09	3.83161297976504E-10	2.04402812135561E-08	5.71319330275426E-09
506790	4156890	321.993988037109	1.35547159987582E-05	2.2949626751095E-07	4.81486117779998E-06	1.88275649955314E-06	8.68361370851702E-09	3.38010221724901E-10	1.79589417901136E-08	5.02064366131355E-09
506990	4156890	312.610992431641	1.20919622293829E-05	2.05095843507968E-07	4.48528748822989E-06	1.74826924416923E-06	7.60980961401187E-09	2.97466336025279E-10	1.57368743719539E-08	4.40037640698799E-09
507190	4156890	312.743011474609	1.07427704852787E-05	1.82503696308954E-07	4.16214198077118E-06	1.6172602379762E-06	6.65190688481841E-09	2.61194495171909E-10	1.3754775550319E-08	3.84701572871391E-09
507390	4156890	314.902008056641	9.51505491562756E-06	1.61866163653666E-07	3.84898218415266E-06	1.49110619825915E-06	5.80054541164506E-09	2.28857300618146E-10	1.19932542089614E-08	3.35516085339312E-09
507590	4156890	312.305999755859	8.40797564027629E-06	1.43185592279823E-07	3.54794490520481E-06	1.37057924734034E-06	5.04650637584222E-09	2.00121791814083E-10	1.04332129626464E-08	2.91949232297623E-09
507790	4156890	309.820007324219	7.41609970557452E-06	1.26387083345788E-07	3.26035988450648E-06	1.25611096110529E-06	4.38085632872874E-09	1.74664740605639E-10	9.05614657567902E-09	2.53485518431843E-09
507990	4156890	308.713012695312	6.53167178184345E-06	1.11355331387125E-07	2.9870732619129E-06	1.14793261359165E-06	3.79505551728709E-09	1.52176534245392E-10	7.84436638241245E-09	2.19632147827455E-09
508190	4156890	298.040008544922	5.74591563872653E-06	9.79560106397021E-08	2.72861954765162E-06	1.04615089216765E-06	3.28103516874834E-09	1.32364024348383E-10	6.7811603069596E-09	1.89923485556473E-09
508390	4156890	290.549011230469	5.04979858653402E-06	8.60485135119995E-08	2.48531108190303E-06	9.50788318612847E-07	2.83124834354493E-09	1.14952510021969E-10	5.85089803491803E-09	1.63923998151876E-09
508590	4156890	294.143005371094	4.43447982535401E-06	7.54935416741088E-08	2.25728293252886E-06	8.61804303689916E-07	2.43869869752697E-09	9.96868087020143E-11	5.03909050908256E-09	1.41229913287495E-09
508790	4156890	289.816986083984	3.89156542986473E-06	6.61575236655067E-08	2.04451540662467E-06	7.79106096542349E-07	2.09695132814152E-09	8.63317205768868E-11	4.33241227156699E-09	1.21469847605999E-09
508990	4156890	275.415008544922	3.41324278312613E-06	5.79150377725459E-08	1.84684717554513E-06	7.02555071843343E-07	1.8001293771306E-09	7.46719564964342E-11	3.71869431425884E-09	1.043046114342E-09
509190	4156890	276.240997314453	2.99233961237617E-06	5.06499803306201E-08	1.66398620983266E-06	6.31971423900178E-07	1.54289968707712E-09	6.45116756095093E-11	3.18689425184284E-09	8.94263822077602E-10
509390	4156890	288.846984863281	2.62233633268085E-06	4.42559522321191E-08	1.49552197770171E-06	5.67138815915717E-07	1.32045034389573E-09	5.56737401948472E-11	2.72704967941696E-09	7.65574102748707E-10
509590	4156890	280.867004394531	2.29735014515934E-06	3.86361664181694E-08	1.34094003316554E-06	5.07809584339315E-07	1.12846247868511E-09	4.79987362497055E-11	2.33021967007546E-09	6.54483923283875E-10
509790	4156890	283.809997558594	2.01210276294553E-06	3.37030729407303E-08	1.19963879808695E-06	4.53710553549676E-07	9.63078322464938E-10	4.13438413564944E-11	1.98841853376327E-09	5.58766279729008E-10
509990	4156890	278.075012207031	1.76187936945545E-06	2.93778285432684E-08	1.07094770446044E-06	4.04549241445963E-07	8.20867159852177E-10	3.55816521291213E-11	1.69454519345459E-09	4.76440568592481E-10
510190	4156890	271.838989257812	1.54248363488931E-06	2.55896880289449E-08	9.54145672882761E-07	3.60020136069728E-07	6.98790449793532E-10	3.05989763268369E-11	1.44231084875537E-09	4.05752477141301E-10
510390	4156890	267.134002685547	1.35019181388158E-06	2.22753658317765E-08	8.4847897593239E-07	3.19810731151968E-07	5.94167084619662E-10	2.62955918512516E-11	1.22616697069179E-09	3.45153937375081E-10
510590	4156890	253.098999023438	1.18170778242969E-06	1.93783999832164E-08	7.53177733796224E-07	2.83607069727854E-07	5.04639569038442E-10	2.25830485816909E-11	1.04123519840014E-09	2.93283616873657E-10
510790	4156890	214.182006835938	1.03412012009025E-06	1.68485362100877E-08	6.6747052809992E-07	2.51098621767059E-07	4.28141655461903E-10	1.93835190114284E-11	8.83240262083209E-10	2.48948249681881E-10
510990	4156890	194.593994140625	9.04861860565187E-07	1.46411423523591E-08	5.90596846707047E-07	2.21982398738295E-07	3.6286781081846E-10	1.66287145604537E-11	7.4844670522502E-10	2.11105025040594E-10
511190	4156890	179.975997924805	7.91673224531263E-07	1.27166578947893E-08	5.21817266910005E-07	1.95966274780959E-07	3.07244740197277E-10	1.42588588970897E-11	6.33599889680386E-10	1.78845156109653E-10
511390	4156890	160.904998779297	6.92567451474447E-07	1.10400830751922E-08	4.60421434135512E-07	1.72771537939443E-07	2.59905111994737E-10	1.2221755190752E-11	5.35871549737539E-10	1.51378726520296E-10
511590	4156890	142.916000366211	6.05799717237363E-07	9.5805071140611E-09	4.05733991894229E-07	1.52134727334244E-07	2.19663511640022E-10	1.04719252795355E-11	4.52809975120588E-10	1.28020819832058E-10
511790	4156890	129.166000366211	5.29839042689463E-07	8.31067528862086E-09	3.57118681986622E-07	1.33808835086197E-07	1.85494602573994E-10	8.96982472558603E-12	3.82294773091678E-10	1.08178921568853E-10
511990	4156890	138.110000610352	4.63343046639227E-07	7.20659309704943E-09	3.13980864554378E-07	1.17563961896404E-07	1.5651341718189E-10	7.68111969797976E-12	3.22496053269346E-10	9.13415419479645E-11
512190	4156890	128.376007080078	4.05135364621189E-07	6.24716702892233E-09	2.75768712161065E-07	1.03187517658826E-07	1.3195769329578E-10	6.57605759568361E-12	2.71837840033981E-10	7.7068030894512E-11
512390	4156890	120.847999572754	3.54185538327574E-07	5.41387929973146E-09	2.41973329947244E-07	9.04840563323441E-08	1.11172116642621E-10	5.62889810736836E-12	2.28965441086426E-10	6.49794887450541E-11
512590	4156890	82.2030029296875	3.09591172041914E-07	4.69049437634843E-09	2.12128029603162E-07	7.92748258373188E-08	9.35943275436673E-11	4.8174016258876E-12	1.92716473987844E-10	5.47506911412863E-11
512790	4156890	86.8040008544922	2.70562151032554E-07	4.06279484815325E-09	1.85806955769442E-07	6.93971030622682E-08	7.87425540038191E-11	4.12237778941069E-12	1.62095262037912E-10	4.61029534477993E-11
512990	4156890	50.0069999694824	2.36406723636256E-07	3.51834477621619E-09	1.62623243094837E-07	6.0703377086336E-08	6.62047256977721E-11	3.52728873498485E-12	1.36250298421109E-10	3.87978507113532E-11
513190	4156890	21.3320007324219	2.06519256255693E-07	3.04627785903642E-09	1.42226850169849E-07	5.30604316703599E-08	5.562892164957E-11	3.01789636103389E-12	1.14454473971763E-10	3.26317043421859E-11
513390	4156890	9.71500015258789	1.8036947942902E-07	2.63710814477162E-09	1.24302191794151E-07	4.63483693893631E-08	4.67150167140047E-11	2.5819506972316E-12	9.60877865868796E-11	2.74307584561326E-11
513590	4156890	0	1.57493063876187E-07	2.28256288070217E-09	1.08565673491875E-07	4.04596146423894E-08	3.92074070051024E-11	2.20892466693246E-12	8.06222865333407E-11	2.30469844551282E-11
513790	4156890	0	1.37483368367157E-07	1.97543355109058E-09	9.47631959315516E-08	3.52979174313394E-08	3.2888685811451E-11	1.88978062520368E-12	6.76089903573994E-11	1.93544320786526E-11
513990	4156890	0	1.19984222876028E-07	1.70944404976618E-09	8.26676930996028E-08	3.07773802789744E-08	2.75741598580171E-11	1.61676514515283E-12	5.66665350295622E-11	1.62460636496464E-11
514190	4156890	0	1.04683618640631E-07	1.47913378813666E-09	7.20767455879624E-08	2.68215218101324E-08	2.31071058361056E-11	1.38322731049287E-12	4.74713660019917E-11	1.36310132038656E-11
514390	4156890	0	9.13081955357141E-08	1.27975507810845E-09	6.28103016921788E-08	2.33623883784674E-08	1.93546799010138E-11	1.18346674765295E-12	3.97492743396129E-11	1.14322259639524E-11
514590	4156890	0	7.96184263039378E-08	1.10718273982899E-09	5.47085266008981E-08	2.0339719751277E-08	1.62043979820804E-11	1.01260145159638E-12	3.32681188919289E-11	9.58442726203244E-12
514790	4156890	0	6.94044091575666E-08	9.5783454668277E-10	4.76297915679935E-08	1.77001722612353E-08	1.35611091107279E-11	8.66452182834331E-13	2.78315662516772E-11	8.03237409817194E-12
482590	4157090	189.154006958008	7.19137280652448E-11	1.48781011272108E-11	3.70958044057283E-11	2.29048818789082E-11	2.47716576107786E-13	7.21367578424237E-14	4.0816544665574E-13	1.61460105954367E-13
482790	4157090	187.328994750977	8.10674907485307E-11	1.66295257779581E-11	4.24716759156868E-11	2.59650686876036E-11	2.93429657408752E-13	8.28833514850876E-14	4.88197469243183E-13	1.90622558251493E-13
482990	4157090	205.238998413086	9.1357336766207E-11	1.85782816497618E-11	4.86149962223739E-11	2.94283737068776E-11	3.47656693198566E-13	9.51987462629899E-14	5.83843652010585E-13	2.25086783370645E-13
483190	4157090	235.026992797852	1.02919111050558E-10	2.07452701115691E-11	5.56336062092619E-11	3.33470702740354E-11	4.11992831492763E-13	1.0930780634117E-13	6.98131893395336E-13	2.65822599954047E-13
483390	4157090	210.552001953125	1.15904112165454E-10	2.31534232849133E-11	6.36502627627256E-11	3.77801110023853E-11	4.88332686226639E-13	1.25467310974621E-13	8.34672891666824E-13	3.13978143895459E-13
483590	4157090	215.29899597168	1.30480742893962E-10	2.58278577513549E-11	7.28046639194274E-11	4.27939564891217E-11	5.78926318080931E-13	1.4397026594555E-13	9.97771217914854E-13	3.70912551790331E-13
483790	4157090	239.093002319336	1.46836327169569E-10	2.87960268258925E-11	8.32557585380324E-11	4.84635057050632E-11	6.86445617491497E-13	1.65150832992767E-13	1.19255730838907E-12	4.38234657408927E-13
483990	4157090	286.303009033203	1.65179138526919E-10	3.20879431733978E-11	9.51843665052173E-11	5.48731834070468E-11	8.14063225514483E-13	1.89390492856801E-13	1.42514435417516E-12	5.17849210549721E-13
484190	4157090	303.523010253906	1.85740615082742E-10	3.57363604204897E-11	1.08796142814244E-10	6.21181252933457E-11	9.65545828111772E-13	2.17124575987661E-13	1.702814477606E-12	6.12011148519707E-13
484390	4157090	276.529998779297	2.08777811863524E-10	3.97769782136338E-11	1.24324942938989E-10	7.0305522879762E-11	1.14536472333963E-12	2.4884986374984E-13	2.03423971251886E-12	7.2338990267121E-13
484590	4157090	253.897003173828	2.34576122334352E-10	4.42486728419891E-11	1.42036639791806E-10	7.95561475867313E-11	1.35882673852777E-12	2.85133281703904E-13	2.42974413872826E-12	8.55145443365159E-13
484790	4157090	238.427993774414	2.63452275933806E-10	4.91937215875015E-11	1.62233451661865E-10	9.00060550673927E-11	1.61222920012846E-12	3.266218738858E-13	2.90161468119601E-12	1.01101819794981E-12
484990	4157090	241.419006347656	2.95757672459694E-10	5.46580588271278E-11	1.85258849761982E-10	1.01808518873348E-10	1.91304340526035E-12	3.74054404353478E-13	3.46446942064618E-12	1.19543544703839E-12
485190	4157090	241.848999023438	3.31882050870401E-10	6.0691493664647E-11	2.1150312109187E-10	1.15136175792764E-10	2.27013104534829E-12	4.2827398503156E-13	4.13569379657881E-12	1.41363651617889E-12
485390	4157090	239.039001464844	3.7225758998399E-10	6.73479734838573E-11	2.41409674948764E-10	1.30183468748165E-10	2.69400036410741E-12	4.90243016689806E-13	4.93595695267803E-12	1.67182096352342E-12
485590	4157090	204.651000976562	4.17363460817008E-10	7.46858379401976E-11	2.75482190452791E-10	1.47169386839285E-10	3.19710849619017E-12	5.61060028666084E-13	5.88982255609966E-12	1.97732326747163E-12
485790	4157090	203.462005615234	4.67730954546999E-10	8.27681665317397E-11	3.14292728739058E-10	1.66340613160851E-10	3.7942193054385E-12	6.4198019622558E-13	7.02647123253439E-12	2.33881987633502E-12
485990	4157090	175.410003662109	5.23949161957563E-10	9.16630557412171E-11	3.58490910343312E-10	1.87975011625367E-10	4.50282456057589E-12	7.34437627185931E-13	8.38055373607029E-12	2.76657229865473E-12
486190	4157090	143.253005981445	5.86671295453834E-10	1.01443830397603E-10	4.08814273223784E-10	2.12385497388659E-10	5.34363948271299E-12	8.40069547809567E-13	9.99319714185793E-12	3.27271225234273E-12
486390	4157090	109.072998046875	6.5662186895386E-10	1.12189409317635E-10	4.66100071137274E-10	2.39924525457098E-10	6.34118838664925E-12	9.60746533563306E-13	1.19131935662005E-11	3.87157975872474E-12
486590	4157090	69.5199966430664	7.34604769022086E-10	1.23984678883239E-10	5.31298628095743E-10	2.70989145488098E-10	7.52449401339168E-12	1.09860711508884E-12	1.41984013084545E-11	4.58012089881794E-12
486790	4157090	72.8840026855469	8.21512313552885E-10	1.36920805228209E-10	6.05488419456752E-10	3.06026639884292E-10	8.92788733029711E-12	1.25609606930767E-12	1.6917394063529E-11	5.418354197967E-12
486990	4157090	74.4219970703125	9.18335511814571E-10	1.51095594953927E-10	6.89893154696063E-10	3.45540914750635E-10	1.05919597412719E-11	1.43600895627855E-12	2.01514019842388E-11	6.40991915370968E-12
487190	4157090	73.390998840332	1.02617593958095E-09	1.66613884755723E-10	7.85901878147559E-10	3.90099997655991E-10	1.25646810902165E-11	1.64154323216585E-12	2.39965935830882E-11	7.58272016789057E-12
487390	4157090	72.9670028686523	1.1462590108787E-09	1.83587948445309E-10	8.9509110696123E-10	4.40344281110469E-10	1.4902711163116E-11	1.87635691846488E-12	2.8566755625836E-11	8.96968179042618E-12
487590	4157090	71.875	1.27994851621423E-09	2.02138117777307E-10	1.01924803377773E-09	4.96995286795891E-10	1.7672938035144E-11	2.1446398617787E-12	3.39964375853499E-11	1.06096366628428E-11
487790	4157090	71.5240020751953	1.42876384324561E-09	2.22392858304285E-10	1.16039931395182E-09	5.60866094655476E-10	2.09542743167425E-11	2.45118378012776E-12	4.04446347815076E-11	1.25483557180338E-11
487990	4157090	71.9570007324219	1.59439943530578E-09	2.44489309492578E-10	1.32084269228257E-09	6.32873093135291E-10	2.48397607214756E-11	2.80147097904859E-12	4.80991004426453E-11	1.48397592225391E-11
488190	4157090	69.9120025634766	1.77874710454476E-09	2.68574149077353E-10	1.50318277913765E-09	7.14049433282044E-10	2.94390243496808E-11	3.20178216638246E-12	5.71813865964384E-11	1.75473355254656E-11
488390	4157090	76.4960021972656	1.9839213455391E-09	2.94804056177885E-10	1.71037133227933E-09	8.05559850595244E-10	3.48811419053852E-11	3.65931015380702E-12	6.7952727057343E-11	2.07457879066968E-11
488590	4157090	100.140998840332	2.21228821430542E-09	3.23346389306276E-10	1.94575256731105E-09	9.08717437737439E-10	4.13179750324667E-11	4.18229342912802E-12	8.07208948241716E-11	2.45229549583352E-11
488790	4157090	111.906997680664	2.46649857191035E-09	3.5437996967578E-10	2.21311450056473E-09	1.02500265990212E-09	4.89280483729678E-11	4.78016916775042E-12	9.58481823123132E-11	2.89820436238876E-11
488990	4157090	114.03099822998	2.74952590753703E-09	3.88095949356172E-10	2.51674652135317E-09	1.15608467072095E-09	5.79210508687014E-11	5.4637482156265E-12	1.13760672321596E-10	3.42442213727559E-11
489190	4157090	115.741996765137	3.06470829840254E-09	4.24698753708177E-10	2.86150045617207E-09	1.30384393468533E-09	6.85430512982942E-11	6.2454151783491E-12	1.34958988919699E-10	4.04516200846836E-11
489390	4157090	116.052001953125	3.4157971344662E-09	4.64407336657564E-10	3.25286107659291E-09	1.47039845521712E-09	8.10825329561577E-11	7.13936001519844E-12	1.60030740661868E-10	4.77708127927753E-11
489590	4157090	117.275001525879	3.80701615898572E-09	5.07456330321726E-10	3.69703614631536E-09	1.65813698114832E-09	9.5877349731002E-11	8.16183336881613E-12	1.89664891452033E-10	5.63968201060071E-11
489790	4157090	119.234001159668	4.24312396730099E-09	5.54097382157678E-10	4.20104285214527E-09	1.86975102864722E-09	1.13322739833725E-10	9.33144095772243E-12	2.24668321103675E-10	6.65577272096955E-11
489990	4157090	124.959999084473	4.72948694714523E-09	6.04600982241855E-10	4.77280915027457E-09	2.10827259540432E-09	1.33880535411996E-10	1.06694833122373E-11	2.65984860991076E-10	7.85199918963182E-11
490190	4157090	149.035995483398	5.27216223360416E-09	6.59258554267165E-10	5.42128694034487E-09	2.37711630853921E-09	1.5808971373669E-10	1.22003412819673E-11	3.14717116970766E-10	9.2594526898324E-11
490390	4157090	175.735992431641	5.87799171096689E-09	7.18384731604948E-10	6.15657809280167E-09	2.68012632561192E-09	1.86578446274127E-10	1.3951910317336E-11	3.72151415565098E-10	1.09143648013569E-10
490590	4157090	204.794006347656	6.55470858691112E-09	7.8231998904789E-10	6.99007447297507E-09	3.02162851026071E-09	2.20077821810101E-10	1.59560914930573E-11	4.39786229240055E-10	1.28588988434087E-10
490790	4157090	194.220001220703	7.31105756046772E-09	8.51432416290966E-10	7.93461307902314E-09	3.40648750789177E-09	2.59437407983874E-10	1.82493127003818E-11	5.19364450200567E-10	1.51420457924642E-10
490990	4157090	190.046005249023	8.15693140545781E-09	9.26122833863916E-10	9.0046478706063E-09	3.84017197996361E-09	3.05642874286105E-10	2.08731872704768E-11	6.12909908001668E-10	1.78206430697666E-10
491190	4157090	194.220993041992	9.1035235712292E-09	1.00682706282327E-09	1.02164388497091E-08	4.32882423615408E-09	3.59835803885996E-10	2.38751775636113E-11	7.22768496088045E-10	2.09605161689506E-10
491390	4157090	221.212005615234	1.0163500302437E-08	1.09402028124093E-09	1.15882601653995E-08	4.87933806224027E-09	4.23335905023549E-10	2.7309359792302E-11	8.5165428523953E-10	2.46377602405462E-10
491590	4157090	221.016998291016	1.13511934626233E-08	1.18822151476256E-09	1.31406281345673E-08	5.49944381475176E-09	4.97665770449713E-10	3.12372620216366E-11	1.00270095843972E-09	2.89401684613739E-10
491790	4157090	224.201995849609	1.26828165265712E-08	1.29000001738915E-09	1.48965502421531E-08	6.19780229036062E-09	5.84578345237506E-10	3.57288345217538E-11	1.17951885790914E-09	3.39688192622532E-10
491990	4157090	233.216003417969	1.41767048567675E-08	1.39998082505571E-09	1.68817956240929E-08	6.98410581116234E-09	6.86087151358844E-10	4.08634651280398E-11	1.38625782157734E-09	3.98398207079066E-10
492190	4157090	239.055999755859	1.58535825549318E-08	1.51885098713373E-09	1.9125187824246E-08	7.86918777484651E-09	8.04499314829164E-10	4.67310855031479E-11	1.62767589568521E-09	4.66862177044475E-10
492390	4157090	252.115005493164	1.7736858511171E-08	1.64736652608605E-09	2.1658919839884E-08	8.86514070697122E-09	9.42451365464726E-10	5.34333665984165E-11	1.90921382209707E-09	5.46600592142761E-10
492590	4157090	265.933990478516	1.98529532930157E-08	1.78636006234967E-09	2.45188912073834E-08	9.9854426852548E-09	1.10294763864587E-09	6.10849934734069E-11	2.23707498222256E-09	6.39346163023547E-10
492790	4157090	294.634002685547	2.22316593065828E-08	1.93675054727334E-09	2.77450662841829E-08	1.12450927552412E-08	1.28940100013905E-09	6.98150505009733E-11	2.61831018898358E-09	7.47067371216545E-10
492990	4157090	301.921997070312	2.49065347932514E-08	2.09955037204661E-09	3.13818518524015E-08	1.26607516307372E-08	1.50567536746803E-09	7.97683543797431E-11	3.06090633552363E-09	8.71993005512542E-10
493190	4157090	302.608001708984	2.7915335176037E-08	2.27587420812032E-09	3.54784916308942E-08	1.42508895977504E-08	1.75612942151431E-09	9.11068503450119E-11	3.5738774696349E-09	1.01663738937384E-09
493390	4157090	310.648986816406	3.13004829393527E-08	2.46695376743282E-09	4.00894742475551E-08	1.603594305994E-08	2.04566051298424E-09	1.04011153678833E-10	4.1673563059394E-09	1.18382583141644E-09
493590	4157090	312.065002441406	3.5109572000906E-08	2.67414645706251E-09	4.52749491512638E-08	1.80384700338068E-08	2.37974726253472E-09	1.18681830740312E-10	4.85268348324078E-09	1.37671928533874E-09
493790	4157090	316.06201171875	3.93959162084135E-08	2.89894695428031E-09	5.11011443667185E-08	2.02833081746833E-08	2.76448959823374E-09	1.35340642115095E-10	5.64249113363773E-09	1.59883747045788E-09
493990	4157090	323.001007080078	4.42191340038062E-08	3.14299976494043E-09	5.76407769985847E-08	2.27977308132358E-08	3.20664393542908E-09	1.54231680089932E-10	6.55077636082072E-09	1.85407923312702E-09
494190	4157090	325.579010009766	4.96457691567641E-08	3.40810773978128E-09	6.49734466559274E-08	2.56115942394319E-08	3.71365067699653E-09	1.75622060660223E-10	7.59295923451349E-09	2.1467384662809E-09
494390	4157090	327.424011230469	5.57499620264232E-08	3.69624755147018E-09	7.31860065898533E-08	2.87574814016934E-08	4.29365126462599E-09	1.99802382835614E-10	8.78591886452367E-09	2.48151403300863E-09
494590	4157090	321.835998535156	6.26141294506732E-08	4.00958087168576E-09	8.23728712876366E-08	3.22708199314801E-08	4.9554908204685E-09	2.270866307801E-10	1.01479996798332E-08	2.86351136323378E-09
494790	4157090	316.911010742188	7.03296836286807E-08	4.35046399263088E-09	9.26362687348185E-08	3.61899792117192E-08	5.70870211153165E-09	2.57811392395283E-10	1.16989789842603E-08	3.2982332580377E-09
494990	4157090	317.209991455078	7.89977709282164E-08	4.72145807035828E-09	1.04086403615935E-07	4.05563357194283E-08	6.56346592065169E-09	2.92334291697981E-10	1.34599855531855E-08	3.79155710628315E-09
495190	4157090	311.424987792969	8.87300543896872E-08	5.12533544271164E-09	1.16841532234106E-07	4.54143040119551E-08	7.53054229127995E-09	3.31031255794827E-10	1.54533578911101E-08	4.34969521082853E-09
495390	4157090	307.197998046875	9.96494832009744E-08	5.56508593710847E-09	1.31027879213742E-07	5.08113106426758E-08	8.62116694619474E-09	3.74292692613615E-10	1.7702429901137E-08	4.97913502532103E-09
495590	4157090	297.415985107422	1.11891071816073E-07	6.04392256940791E-09	1.46779393310992E-07	5.6797709658081E-08	9.84690647554631E-09	4.2251826536348E-10	2.02312311436225E-08	5.6865556634095E-09
495790	4157090	292.113006591797	1.25602675706568E-07	6.56528074587848E-09	1.64237305826258E-07	6.34266227408163E-08	1.1219466182937E-08	4.7610989055592E-10	2.30640888113949E-08	6.4787169855217E-09
495990	4157090	294.963989257812	1.40945752799172E-07	7.13281152787706E-09	1.83549458196015E-07	7.07536923040644E-08	1.27504447976129E-08	5.3546292376681E-10	2.62251193063772E-08	7.3623180174683E-09
496190	4157090	271.860992431641	1.58096114658196E-07	7.75037221924806E-09	2.04869366134932E-07	7.88367378583535E-08	1.44510309988727E-08	6.00955316714054E-10	2.97375989517446E-08	8.34382176072512E-09
496390	4157090	273.230987548828	1.77244666151147E-07	8.42201748532975E-09	2.28354990637873E-07	8.77353069991593E-08	1.63316382462546E-08	6.72934776677979E-10	3.36232063078899E-08	9.42924441574608E-09
496590	4157090	289.445007324219	1.98598135058877E-07	9.15198078887744E-09	2.5416718898306E-07	9.75101047891361E-08	1.84014761356799E-08	7.51703648256674E-10	3.7901132720906E-08	1.06239079167233E-08
496790	4157090	293.962005615234	2.22379797497843E-07	9.94463707391308E-09	2.82467825525337E-07	1.08222288440232E-07	2.0668059035375E-08	8.37500976046955E-10	4.25870635342479E-08	1.19321560259514E-08
496990	4157090	282.359008789062	2.48830258898651E-07	1.08044717984315E-08	3.13417547525883E-07	1.19932645263417E-07	2.31366580541519E-08	9.30483098722244E-10	4.76920407536361E-08	1.33570378472399E-08
497190	4157090	290.760986328125	2.78208359684595E-07	1.17360631660582E-08	3.47173246153999E-07	1.32700665536604E-07	2.58097061626951E-08	1.03070338953942E-09	5.32212271205692E-08	1.48999645130549E-08
497390	4157090	298.248992919922	3.10792098014909E-07	1.27440316914684E-08	3.83885165735885E-07	1.4658346760643E-07	2.86861699097212E-08	1.13808999970306E-09	5.91726019859299E-08	1.65603462813279E-08
497590	4157090	305.457000732422	3.4687986761817E-07	1.38329975966903E-08	4.2369380556797E-07	1.61634653206499E-07	3.17609096097372E-08	1.25242336111318E-09	6.55356328544084E-08	1.83352229903753E-08
497790	4157090	314.265991210938	3.86792212791702E-07	1.5007552413323E-08	4.66726745092976E-07	1.77903144248942E-07	3.50240553026311E-08	1.37331439071132E-09	7.22899792841279E-08	2.02189036271697E-08
497990	4157090	318.300994873047	4.3087408513565E-07	1.62722298111518E-08	5.13095454279645E-07	1.95432013803375E-07	3.8460432009982E-08	1.50018450203978E-09	7.94042988329706E-08	2.22026343406851E-08
498190	4157090	327.279998779297	4.79497903066093E-07	1.76314917576286E-08	5.62892308065694E-07	2.14257400509836E-07	4.20490735102191E-08	1.6322488133147E-09	8.68352364408762E-08	2.42743175489673E-08
498390	4157090	333.183990478516	5.33067748996894E-07	1.90897391405855E-08	6.16188076855005E-07	2.34407610369355E-07	4.57628681176349E-08	1.76850410327001E-09	9.45266874789509E-08	2.64183072570737E-08
498590	4157090	332.25	5.92025040986646E-07	2.06513645317465E-08	6.73030188787557E-07	2.55902523885435E-07	4.95683821233183E-08	1.90772334422028E-09	1.02409429073742E-07	2.8615307070667E-08
498790	4157090	338.595001220703	6.56856055633987E-07	2.23208246445789E-08	7.33442116480038E-07	2.78753421385053E-07	5.34259052354889E-08	2.04845739739011E-09	1.10401212391544E-07	3.08423959646824E-08
498990	4157090	351.596008300781	7.28101765048908E-07	2.41027911903796E-08	7.97424281819635E-07	3.02963406058694E-07	5.7289758632441E-08	2.18904675681365E-09	1.18407399203924E-07	3.30732060689001E-08
499190	4157090	354.936004638672	8.06370429920581E-07	2.60023686546035E-08	8.64956883404413E-07	3.28528563288052E-07	6.11088965107616E-08	2.32764357906401E-09	1.26322207416124E-07	3.52782698328997E-08
499390	4157090	368.269989013672	8.92353378897175E-07	2.80254001554951E-08	9.3600503404611E-07	3.55440009537471E-07	6.48278190243944E-08	2.46224493163505E-09	1.34030602527153E-07	3.74255470796276E-08
499590	4157090	381.917999267578	9.8684432308341E-07	3.01788586518971E-08	1.010526530347E-06	3.8368694519506E-07	6.83877965394498E-08	2.5907367700484E-09	1.41410835258573E-07	3.94811316506097E-08
499790	4157090	387.805999755859	1.09076242261543E-06	3.24713466190031E-08	1.0884824590601E-06	4.13260800001975E-07	7.17283845007017E-08	2.71094850923596E-09	1.48337581919541E-07	4.14101260025259E-08
499990	4157090	395.851989746094	1.20517908355653E-06	3.49136856865351E-08	1.16985065239037E-06	4.44160463610682E-07	7.47891839519066E-08	2.82071575873457E-09	1.54685595317535E-07	4.31776574713096E-08
500190	4157090	402.773986816406	1.33134817912846E-06	3.75196048054948E-08	1.25464176854513E-06	4.76398526092178E-07	7.75117808029647E-08	2.91794953410519E-09	1.60333726535708E-07	4.4749997846339E-08
500390	4157090	396.261993408203	1.47074174473859E-06	4.03065178426006E-08	1.3429174649116E-06	5.10008330485784E-07	7.98417755789118E-08	3.00070920514443E-09	1.65169133978858E-07	4.60957354537502E-08
500590	4157090	405.674987792969	1.62511607317662E-06	4.32969017673339E-08	1.4348196727435E-06	5.45055413664003E-07	8.17307975326342E-08	3.06727418317446E-09	1.6909146120504E-07	4.71869380186406E-08
500790	4157090	414.100006103516	1.79689255098057E-06	4.6525233936846E-08	1.53069661370117E-06	5.81687395854766E-07	8.31383895002681E-08	3.1162109370223E-09	1.72016747052435E-07	4.80002409569106E-08
500990	4157090	425.238006591797	1.98877027040905E-06	5.00313336192669E-08	1.63099122506871E-06	6.20089479759058E-07	8.40336491910373E-08	3.146431504834E-09	1.73880830652597E-07	4.8517795193023E-08
501190	4157090	432.545013427734	2.20383322858746E-06	5.3862455459217E-08	1.73628067176001E-06	6.60500041705971E-07	8.43965217426024E-08	3.15723937592343E-09	1.74642033304961E-07	4.87280135357019E-08
501390	4157090	430.161010742188	2.44608252890943E-06	5.80827029703392E-08	1.84741647098872E-06	7.03267195045106E-07	8.42186566952413E-08	3.14835892021547E-09	1.74282938941307E-07	4.86260654304264E-08
501590	4157090	418.532989501953	2.72027188737177E-06	6.27702257993711E-08	1.96548642311356E-06	7.48833267451828E-07	8.35037728584558E-08	3.1199485748486E-09	1.72811152137709E-07	4.82140880774671E-08
501790	4157090	401.359008789062	3.03086591717711E-06	6.79992543217422E-08	2.09151306236743E-06	7.97614547928518E-07	8.2267504346783E-08	3.07259492198374E-09	1.70258980781137E-07	4.7501097754478E-08
501990	4157090	392.81298828125	3.38298999620768E-06	7.38564095783675E-08	2.22671336473558E-06	8.50105392732466E-07	8.05367383084076E-08	3.00728833137351E-09	1.66682064980939E-07	4.6502607575732E-08
502190	4157090	378.138000488281	3.78275022537167E-06	8.04460574289641E-08	2.37257674476926E-06	9.0690978384489E-07	7.83484898747953E-08	2.92538237868918E-09	1.62157045942466E-07	4.52399782163309E-08
502390	4157090	374.658996582031	4.23691181449306E-06	8.78845987421095E-08	2.53074629293448E-06	9.68694843659661E-07	7.57483895064612E-08	2.82853944514326E-09	1.56778430917533E-07	4.37395448537771E-08
502590	4157090	369.696990966797	4.75287339370575E-06	9.6299774683706E-08	2.7029844027418E-06	1.0361779951791E-06	7.27888805159092E-08	2.7186650698652E-09	1.50654857722286E-07	4.20315762906315E-08
502790	4157090	368.959014892578	5.33818480788882E-06	1.05822001136282E-07	2.89102321818342E-06	1.11006747974961E-06	6.95272398709792E-08	2.59783773885819E-09	1.43904991258418E-07	4.01491329350021E-08
502990	4157090	367.037994384766	5.99851554536314E-06	1.16548561281455E-07	3.09603646116425E-06	1.19084894951003E-06	6.60235369359489E-08	2.46823563374819E-09	1.3665329137763E-07	3.81268883588953E-08
503190	4157090	364.744995117188	6.74012290442167E-06	1.28586679286961E-07	3.31920212273931E-06	1.2790159783382E-06	6.23386399475306E-08	2.33206480038893E-09	1.29025880420541E-07	3.59999783866735E-08
503390	4157090	371.157989501953	7.56858135791416E-06	1.42029406534338E-07	3.56133694188421E-06	1.37492280013932E-06	5.85323672842057E-08	2.19149275063277E-09	1.21146710396309E-07	3.38029338000936E-08
503590	4157090	375.6669921875	8.48940083072893E-06	1.56967112654034E-07	3.82290543941669E-06	1.47879492540912E-06	5.4661860340901E-08	2.04859005383673E-09	1.13134189484493E-07	3.15687409711176E-08
503790	4157090	369.923004150391	9.5099069334277E-06	1.73516199953404E-07	4.10420283959136E-06	1.59081349706355E-06	5.07802322749932E-08	1.90528182233516E-09	1.0509838043621E-07	2.93280617371315E-08
503990	4157090	371.984008789062	1.06332270844623E-05	1.91719580218024E-07	4.40431555002003E-06	1.71067666906966E-06	4.69355233305699E-08	1.76331018814541E-09	9.71388345626944E-08	2.71086302488529E-08
504190	4157090	361.945007324219	1.18599061957551E-05	2.11572106634163E-07	4.72127930276129E-06	1.8376729227017E-06	4.31699711702666E-08	1.62420807194974E-09	8.93430788027028E-08	2.49348316601838E-08
504390	4157090	347.898986816406	1.31875206626624E-05	2.33013229325358E-07	5.05194803425697E-06	1.97062907518884E-06	3.95195853648356E-08	1.48928391898592E-09	8.17857332945077E-08	2.28274564222017E-08
504590	4157090	344.539001464844	1.46105065113727E-05	2.55922975955736E-07	5.39193924706726E-06	2.10788799936661E-06	3.60139998382234E-08	1.35961647978294E-09	7.45282051094118E-08	2.08036150630251E-08
504790	4157090	337.841003417969	1.61206255496381E-05	2.80129381325789E-07	5.73576372279437E-06	2.24736015833444E-06	3.26765656858548E-08	1.23605758303415E-09	6.76188812148917E-08	1.88767915020053E-08
504990	4157090	333.940002441406	1.7708616852001E-05	3.05436488896523E-07	6.07726393435442E-06	2.38669964172477E-06	2.95246417819024E-08	1.11924251819463E-09	6.10937307507816E-08	1.70570107233165E-08
505190	4157090	350.054992675781	1.93635722705434E-05	3.31617696741029E-07	6.40987076798556E-06	2.52339248513986E-06	2.65700372646995E-08	1.00960629961141E-09	5.49772215927487E-08	1.53510942876348E-08
505390	4157090	350.148986816406	2.10080787474254E-05	3.57399628247589E-07	6.71740193154428E-06	2.65078753704836E-06	2.3819560303539E-08	9.07403266041826E-10	4.928345796257E-08	1.37629770340801E-08
505590	4157090	348.648010253906	2.24547235401451E-05	3.79786720897773E-07	6.96818535711622E-06	2.75554462600099E-06	2.1275632045497E-08	8.12728960627569E-10	4.40174531920359E-08	1.22940613725773E-08
505790	4157090	354.953002929688	2.31643562304503E-05	3.90247090981909E-07	7.07920828480504E-06	2.8022629447512E-06	1.89369295813832E-08	7.25543190472815E-10	3.91764624665511E-08	1.0943588381536E-08
505990	4157090	349.815002441406	2.24279160190472E-05	3.77590143658956E-07	6.94369375942936E-06	2.74526887755409E-06	1.6799027665678E-08	6.45693062928592E-10	3.47513129513704E-08	9.70900819289204E-09
506190	4157090	343.054992675781	2.0695871058599E-05	3.4898200154397E-07	6.63101057848708E-06	2.61416850253254E-06	1.48550154163993E-08	5.72935142548415E-10	3.07276820216128E-08	8.5863359404943E-09
506390	4157090	339.975006103516	1.87058792130356E-05	3.16140836175077E-07	6.25480874602563E-06	2.45745230312397E-06	1.3096070481202E-08	5.06956110993459E-10	2.70872872748566E-08	7.57048316620604E-09
506590	4157090	338.613006591797	1.67457795299605E-05	2.83674200786652E-07	5.86152255679888E-06	2.29481686734066E-06	1.15119788378801E-08	4.4739149121856E-10	2.3808963814828E-08	6.65555784788527E-09
506790	4157090	326.734008789062	1.49076388447237E-05	2.53089064280128E-07	5.46822524905338E-06	2.13338456599987E-06	1.00915933112728E-08	3.93842078590091E-10	2.08696145615316E-08	5.83512900141035E-09
506990	4157090	322.761993408203	1.32212581705746E-05	2.24898800456696E-07	5.08252392861551E-06	1.97622764214284E-06	8.82322821084839E-09	3.45888318413709E-10	1.82450279385303E-08	5.1024545314728E-09
507190	4157090	324.154998779297	1.16932786732081E-05	1.99240803775731E-07	4.70838651063264E-06	1.82486512075812E-06	7.69499038761663E-09	3.03102232276155E-10	1.59105638935882E-08	4.45067229313556E-09
507390	4157090	322.092010498047	1.03201080375916E-05	1.76081886367201E-07	4.3480931869509E-06	1.68009810843738E-06	6.69504971583438E-09	2.65057226054213E-10	1.3841714306005E-08	3.87295621727507E-09
507590	4157090	319.337005615234	9.09321088047552E-06	1.55303554222896E-07	4.00304869977884E-06	1.54235733683317E-06	5.81185356702316E-09	2.3133591384528E-10	1.20145472774838E-08	3.36264012218095E-09
507790	4157090	317.248992919922	8.00171450727859E-06	1.36744834565379E-07	3.67417479915957E-06	1.41187212264221E-06	5.03429088434888E-09	2.01536116911358E-10	1.04060469712098E-08	2.91331242790689E-09
507990	4157090	314.471984863281	7.03385053566236E-06	1.20226434411287E-07	3.36210714012505E-06	1.28875684699895E-06	4.3518119642785E-09	1.75275139520641E-10	8.99436176040823E-09	2.51888523933753E-09
508190	4157090	307.787994384766	6.17779218459531E-06	1.05565036314823E-07	3.06728734360776E-06	1.17305331176797E-06	3.75451040279622E-09	1.52192921449378E-10	7.75897376615723E-09	2.17364171435176E-09
508390	4157090	301.786010742188	5.42213896753147E-06	9.25817366107157E-08	2.78999797317898E-06	1.06474875872459E-06	3.23317316845711E-09	1.3195394034993E-10	6.6808024303496E-09	1.87226498438676E-09
508590	4157090	302.565002441406	4.75618369777971E-06	8.11068253254289E-08	2.53036955299075E-06	9.63781463526412E-07	2.77930458802659E-09	1.14248138265369E-10	5.74225406666812E-09	1.60985200254424E-09
508790	4157090	292.101013183594	4.17004292256916E-06	7.0982254886929E-08	2.28837770595826E-06	8.70041287030853E-07	2.38512949524874E-09	9.87911268497192E-11	4.92722821465151E-09	1.38191538285647E-09
508990	4157090	287.868011474609	3.65470239249144E-06	6.20626619786966E-08	2.06384081088407E-06	7.83369487534417E-07	2.04358015845791E-09	8.53237784381196E-11	4.22109041348709E-09	1.18437586490393E-09
509190	4157090	288.705993652344	3.20201099868673E-06	5.42155091103052E-08	1.85642316497097E-06	7.03559954961407E-07	1.74827105515703E-09	7.3611394353661E-11	3.61061979010186E-09	1.01354777512117E-09
509390	4157090	300.575988769531	2.8046447725115E-06	4.73207101816271E-08	1.66564505381519E-06	6.30362605835195E-07	1.49346491482407E-09	6.34425574481931E-11	3.08393856491666E-09	8.66119451010881E-10
509590	4157090	301.720001220703	2.45605470906464E-06	4.12699696265116E-08	1.49089901398184E-06	5.63488828150515E-07	1.27403285715466E-09	5.46277102239989E-11	2.63042939603842E-09	7.39130231998887E-10
509790	4157090	295.755004882812	2.15040701983117E-06	3.59659831266855E-08	1.33147055071208E-06	5.02618444249296E-07	1.08541102202905E-09	4.69976513181094E-11	2.24064541801125E-09	6.29945449001862E-10
509990	4157090	289.101989746094	1.88252106686433E-06	3.132158604119E-08	1.18656128206206E-06	4.47407515170237E-07	9.23555545327549E-10	4.04019917914835E-11	1.90621684284174E-09	5.36230470941072E-10
510190	4157090	278.944000244141	1.64780809349114E-06	2.72588968281438E-08	1.05531263022826E-06	3.97496338959759E-07	7.84897297198223E-10	3.47075468830054E-11	1.61975713584429E-09	4.55924590859036E-10
510390	4157090	268.872009277344	1.44221253555655E-06	2.3708487620571E-08	9.36828560156515E-07	3.52517122567293E-07	6.66297513373574E-10	2.97967623946996E-11	1.37477104660318E-09	3.87215430447967E-10
510590	4157090	262.756988525391	1.26215687181516E-06	2.06085964522102E-08	8.30196295602034E-07	3.1210095074477E-07	5.65005130004103E-10	2.5566201910041E-11	1.16556617747062E-09	3.28514329317274E-10
510790	4157090	239.457992553711	1.10449047648212E-06	1.79043893528699E-08	7.34504365045694E-07	2.75883823636194E-07	4.78616383293849E-10	2.19251131231204E-11	9.87169253363996E-10	2.78433041680752E-10
510990	4157090	223.259994506836	9.66442634426047E-07	1.5547273617092E-08	6.48857669673724E-07	2.43511652869881E-07	4.05037032211675E-10	1.87940763915319E-11	8.35247844321553E-10	2.35761942439393E-10
511190	4157090	196.539001464844	8.4557970403715E-07	1.34942635748526E-08	5.72389541369945E-07	2.14644205434768E-07	3.42447416246799E-10	1.6103752796064E-11	7.06037969007156E-10	1.99449869142296E-10
511390	4157090	174.804992675781	7.39766304683344E-07	1.17073984713397E-08	5.04270942709752E-07	1.88958049900434E-07	2.89270438783105E-10	1.37937474895417E-11	5.9627775291305E-10	1.68585657591687E-10
511590	4157090	162.27099609375	6.47130339930803E-07	1.01532094245816E-08	4.43717076937025E-07	1.66148599690367E-07	2.44142452017057E-10	1.18115643522895E-11	5.03147117169538E-10	1.42381347070973E-10
511790	4157090	173.710998535156	5.66031629734145E-07	8.8022330473078E-09	3.89991738919678E-07	1.45931371246051E-07	2.05886963464105E-10	1.01116479488979E-11	4.24213322402938E-10	1.20157005601204E-10
511990	4157090	177.246994018555	4.95033902643724E-07	7.62857018194515E-09	3.42409759051496E-07	1.28042583041081E-07	1.73491049121011E-10	8.65453427163812E-12	3.57382114970229E-10	1.01327123866857E-10
512190	4157090	168.417007446289	4.32879887541874E-07	6.6094862806347E-09	3.00337884500479E-07	1.12239217452644E-07	1.46084310870632E-10	7.40609414707204E-12	3.00854147409528E-10	8.53884787617446E-11
512390	4157090	145.718994140625	3.78469243150325E-07	5.7250511315156E-09	2.63194425529391E-07	9.82986622366121E-08	1.22920190801832E-10	6.33685602711389E-12	2.5308628584649E-10	7.19093538911043E-11
512590	4157090	131.018005371094	3.3083906473075E-07	4.95781468019691E-09	2.30447951894195E-07	8.60180323386197E-08	1.03359451671033E-10	5.42140148211143E-12	2.12757407989843E-10	6.05200067919808E-11
512790	4157090	99.9039993286133	2.89146715680391E-07	4.29251621031827E-09	2.01615286329184E-07	7.52132594014257E-08	8.68556377529235E-11	4.63783470798403E-12	1.78738303596689E-10	5.09042806989499E-11
512990	4157090	95.6790008544922	2.52654744683597E-07	3.71582427926102E-09	1.76259006985421E-07	6.57180237401003E-08	7.29423244668877E-11	3.96731680598525E-12	1.5006528101927E-10	4.27922487315567E-11
513190	4157090	66.3050003051758	2.20717659034128E-07	3.21610400418383E-09	1.53984630597448E-07	5.7382588584483E-08	6.12219689085989E-11	3.39364964161625E-12	1.25917091253373E-10	3.59537760820882E-11
513390	4157090	42.0279998779297	1.92770350629466E-07	2.78321073444827E-09	1.34437620790053E-07	5.00725880817801E-08	5.13561974421611E-11	2.90291674050728E-12	1.05594825106192E-10	3.01929141683095E-11
513590	4157090	22.5590000152588	1.68317978995204E-07	2.40830756745837E-09	1.17300329562827E-07	4.36678064210605E-08	4.30573757780668E-11	2.48317702405667E-12	8.85044696794302E-11	2.53430402788612E-11
513790	4157090	11.4370002746582	1.46927136265671E-07	2.08370303609764E-09	1.02288951150651E-07	3.80609743153861E-08	3.60812985758254E-11	2.12419106446917E-12	7.41417829286949E-11	2.12626371034951E-11
513990	4157090	4.9980001449585	1.28218134344734E-07	1.80270744015438E-09	8.91505531348675E-08	3.31566052819378E-08	3.02208714495794E-11	1.81718246151382E-12	6.20792238842532E-11	1.78316443271695E-11
514190	4157090	0	1.11858276219547E-07	1.55950623478415E-09	7.76602303862966E-08	2.88698871614704E-08	2.53006617293227E-11	1.55463051576973E-12	5.1954680113802E-11	1.49483108066791E-11
514390	4157090	0	9.75559859905157E-08	1.34904899688578E-09	6.76184122182454E-08	2.51256389015637E-08	2.11722141388681E-11	1.33009695694708E-12	4.34617789996219E-11	1.25264926412804E-11
514590	4157090	0	8.50556867981941E-08	1.16695160177126E-09	5.88483405912415E-08	2.18573375350062E-08	1.77100275039741E-11	1.13807309203194E-12	3.63415683377544E-11	1.04933301218207E-11
514790	4157090	0	7.41333297101806E-08	1.00941019732833E-09	5.11937294969962E-08	1.90062181110742E-08	1.48081035868069E-11	9.73845201058027E-13	3.03753813589893E-11	8.78725282807994E-12
482590	4157290	197.634994506836	7.95201783336468E-11	1.66361795890364E-11	4.01692175695015E-11	2.51390407817771E-11	2.72748925668384E-13	8.29303457463165E-14	4.43466537835583E-13	1.78770490727574E-13
482790	4157290	208.598007202148	8.96726061349584E-11	1.86031794082528E-11	4.60042362931049E-11	2.85028537281138E-11	3.23002391415268E-13	9.53072537575406E-14	5.30576542471914E-13	2.11011544058222E-13
482990	4157290	234.958999633789	1.01089584821781E-10	2.07929979434588E-11	5.26741191553904E-11	3.23104176638976E-11	3.8260990687535E-13	1.09493167871313E-13	6.34718171843497E-13	2.49107510362165E-13
483190	4157290	240.177993774414	1.13922853684445E-10	2.32293945857747E-11	6.02964169982782E-11	3.66193377108242E-11	4.53324938752803E-13	1.25747471891177E-13	7.59202802795482E-13	2.94128898817006E-13
483390	4157290	221.235000610352	1.28341442694935E-10	2.59384408560621E-11	6.90049659922691E-11	4.14945722529274E-11	5.3723064921034E-13	1.44366191957405E-13	9.07981180404721E-13	3.47343041005694E-13
483590	4157290	229.069000244141	1.44533531823905E-10	2.89487369505238E-11	7.89521120934876E-11	4.70093737572454E-11	6.36801868767667E-13	1.65687328943017E-13	1.08576582877537E-12	4.10250537279932E-13
483790	4157290	253.662002563477	1.62708470856685E-10	3.22915780164969E-11	9.03112288418185E-11	5.32463031833096E-11	7.5497839228443E-13	1.90096386426143E-13	1.29817651674572E-12	4.84627973311231E-13
483990	4157290	300.345001220703	1.83099020341825E-10	3.60011656669738E-11	1.03279578345207E-10	6.02983971137836E-11	8.95252085485276E-13	2.18033013760594E-13	1.55191325405398E-12	5.72578771662623E-13
484190	4157290	302.053009033203	2.05963833772327E-10	4.01148696317697E-11	1.18081561419869E-10	6.82705073208876E-11	1.06177032750663E-12	2.49998994428576E-13	1.85496194581902E-12	6.7659371015312E-13
484390	4157290	279.566009521484	2.3159016909552E-10	4.46734445702077E-11	1.34972398492119E-10	7.72807669523652E-11	1.25945840692918E-12	2.86566823296926E-13	2.21683856491296E-12	7.99622108424814E-13
484590	4157290	275.153015136719	2.60296902596464E-10	4.97212955834875E-11	1.54242307363134E-10	8.7462267071011E-11	1.49416463401842E-12	3.28389680529906E-13	2.64887909519426E-12	9.4515620350388E-13
484790	4157290	262.282012939453	2.92437843700215E-10	5.53067439407245E-11	1.76221234589154E-10	9.89649329633451E-11	1.77283223054291E-12	3.76212833347785E-13	3.16458362602088E-12	1.11733096424127E-12
484990	4157290	275.380004882812	3.28405403460994E-10	6.1482312602764E-11	2.01284221195877E-10	1.1195764186392E-10	2.10370299560597E-12	4.30886854202123E-13	3.78002451898183E-12	1.32104226643306E-12
485190	4157290	265.140991210938	3.68634664677191E-10	6.83050133615726E-11	2.29857518414715E-10	1.26630612173887E-10	2.49655817150604E-12	4.93382538725662E-13	4.51433032059884E-12	1.56208644508393E-12
485390	4157290	237.033004760742	4.13607861896276E-10	7.58366182015408E-11	2.6242548645564E-10	1.43198064933438E-10	2.96300309355152E-12	5.64807604864494E-13	5.39025916768547E-12	1.84732493656763E-12
485590	4157290	219.302993774414	4.63859379786156E-10	8.41439674571092E-11	2.99538427637224E-10	1.61901245782785E-10	3.51680403311099E-12	6.46426178515222E-13	6.43487787342137E-12	2.18487905100165E-12
485790	4157290	218.667999267578	5.19981325191188E-10	9.32993031494968E-11	3.4182146744692E-10	1.83011840924856E-10	4.17428640383342E-12	7.39681314486122E-13	7.6803656869969E-12	2.58436010469656E-12
485990	4157290	195.626998901367	5.82629775657786E-10	1.03380672730657E-10	3.89984640002126E-10	2.06835872473226E-10	4.95480578230665E-12	8.46221775824661E-13	9.16496550920286E-12	3.05714186526863E-12
486190	4157290	141.285003662109	6.5253169519242E-10	1.14472230843438E-10	4.44834286398515E-10	2.33718001914293E-10	5.88130240171101E-12	9.67930842542408E-13	1.09341074443053E-11	3.61668028348495E-12
486390	4157290	80.7089996337891	7.30492658209206E-10	1.26664498025599E-10	5.07285939719243E-10	2.64046342074221E-10	6.9809544313651E-12	1.10695826574483E-12	1.30417350211881E-11	4.2788893922257E-12
486590	4157290	75.0370025634766	8.17405629904042E-10	1.4005481823355E-10	5.78379012183699E-10	2.98258046250123E-10	8.28595053414497E-12	1.26576039079996E-12	1.55518730381021E-11	5.0625874148572E-12
486790	4157290	76.1640014648438	9.14260820561888E-10	1.54747775784453E-10	6.59293402377372E-10	3.36845563716581E-10	9.83439906282259E-12	1.4471451661994E-12	1.85404759660623E-11	5.99002101717823E-12
486990	4157290	74.3000030517578	1.02215677757112E-09	1.70855567773836E-10	7.51368273424368E-10	3.80363649538473E-10	1.16713972590872E-11	1.6543225960792E-12	2.20976053308191E-11	7.08748097970798E-12
487190	4157290	74.0510025024414	1.1423129480534E-09	1.88498426911885E-10	8.56123328540327E-10	4.29437307208028E-10	1.38502889502813E-11	1.89096328492773E-12	2.63299938052897E-11	8.38602657756631E-12
487390	4157290	73.1839981079102	1.2760839217478E-09	2.07805067299944E-10	9.75282890297007E-10	4.84770756964142E-10	1.64341421674717E-11	2.16126565860137E-12	3.13640613384872E-11	9.92233645645598E-12
487590	4157290	72.4079971313477	1.42497562091325E-09	2.28913186379532E-10	1.1108031454249E-09	5.4715758154324E-10	1.94974837086006E-11	2.47003370417085E-12	3.73494595515436E-11	1.17397076155115E-11
487790	4157290	70.9649963378906	1.59066421587883E-09	2.5197026188487E-10	1.26490421479818E-09	6.17492800809864E-10	2.31283347920754E-11	2.82277126700585E-12	4.44632330291432E-11	1.3889230484885E-11
487990	4157290	72.3580017089844	1.775017199168E-09	2.77133287007383E-10	1.44010571831955E-09	6.96785526650728E-10	2.7430586863211E-11	3.22576737490785E-12	5.29146956890724E-11	1.64311474324487E-11
488190	4157290	75.0149993896484	1.980116468069E-09	3.0456997678842E-10	1.63926318627126E-09	7.8617286503931E-10	3.25267927951836E-11	3.68622553676176E-12	6.29511457854893E-11	1.94364664314342E-11
488390	4157290	89.411003112793	2.20828625185449E-09	3.34459398919411E-10	1.86561413298433E-09	8.86936933848906E-10	3.85614224134092E-11	4.21239714062826E-12	7.48645482305566E-11	2.29888347900987E-11
488590	4157290	110.55899810791	2.46212449718523E-09	3.66992633687122E-10	2.12282844094548E-09	1.00052345354651E-09	4.57046610678332E-11	4.8137336636292E-12	8.89993396121515E-11	2.71867250413932E-11
488790	4157290	115.71199798584	2.74453873540177E-09	4.02373596978404E-10	2.41506508779085E-09	1.1285627294591E-09	5.41568363091368E-11	5.50106297729195E-12	1.05761531318736E-10	3.21459834872254E-11
488990	4157290	119.392997741699	3.05878707011605E-09	4.40819974568076E-10	2.74703598938637E-09	1.272893271257E-09	6.41535680555704E-11	6.28679147240821E-12	1.25629309817537E-10	3.80027955574439E-11
489190	4157290	119.900001525879	3.40852537300814E-09	4.8256428645643E-10	3.12407828116638E-09	1.43558853844617E-09	7.59717495816433E-11	7.18513514363227E-12	1.49165358601734E-10	4.49171299522338E-11
489390	4157290	119.273002624512	3.79786106862192E-09	5.27855224429555E-10	3.5522352318542E-09	1.61898697350521E-09	8.99364846246944E-11	8.21238690568701E-12	1.77031156117543E-10	5.30767344896194E-11
489590	4157290	120.693000793457	4.23141452515041E-09	5.76958958292432E-10	4.03834723037342E-09	1.82572564718998E-09	1.06429109777062E-10	9.38721700365319E-12	2.10003533431322E-10	6.27017567580238E-11
489790	4157290	126.518997192383	4.71438711242643E-09	6.30160416586717E-10	4.5901480965366E-09	2.0587758068429E-09	1.25896454565873E-10	1.07310121788886E-11	2.48993807954638E-10	7.40500777899661E-11
489990	4157290	135.768005371094	5.25263967313338E-09	6.87765110305422E-10	5.2163745895889E-09	2.3214835313689E-09	1.48861516517555E-10	1.22682688244766E-11	2.9506984389293E-10	8.74234631328718E-11
490190	4157290	161.923004150391	5.85278929085337E-09	7.50101796000943E-10	5.92690988582839E-09	2.61762317346511E-09	1.75935735456965E-10	1.40270473634546E-11	3.4948142203624E-10	1.03174638306118E-10
490390	4157290	192.294998168945	6.52231013071605E-09	8.17524651063875E-10	6.73291801766963E-09	2.95144722895157E-09	2.07833050208403E-10	1.6039475457479E-11	4.13689337062369E-10	1.21715390662557E-10
490590	4157290	272.714996337891	7.26965109138464E-09	8.90416659423598E-10	7.64700186870997E-09	3.32774547540143E-09	2.45385972148359E-10	1.83423373068373E-11	4.89398673014532E-10	1.43525844785531E-10
490790	4157290	222.003005981445	8.10436864287503E-09	9.69191390588636E-10	8.68337889911946E-09	3.7519094750289E-09	2.89563874098058E-10	2.09776858288799E-11	5.78596724663692E-10	1.69164989267807E-10
490990	4157290	196.869995117188	9.03727793917083E-09	1.05429780806854E-09	9.85807624958017E-09	4.23000600491636E-09	3.41493777008834E-10	2.39935986887505E-11	6.83596076052943E-10	1.9928267961807E-10
491190	4157290	209.776992797852	1.00806229205115E-08	1.14622433055041E-09	1.11891463761123E-08	4.76885741149098E-09	4.02483840570597E-10	2.74449967254279E-11	8.07083331870127E-10	2.34633189160556E-10
491390	4157290	224.720001220703	1.1248267677691E-08	1.24550312972984E-09	1.26969047637762E-08	5.37613007750816E-09	4.74049812187152E-10	3.13945608065106E-11	9.52174011410623E-10	2.76090469863163E-10
491590	4157290	226.79899597168	1.25559113471487E-08	1.35271434004524E-09	1.44041912974095E-08	6.06043136249913E-09	5.57944634163107E-10	3.59137025307264E-11	1.12247407157226E-09	3.24665214291172E-10
491790	4157290	227.815002441406	1.40213299358839E-08	1.4684938313215E-09	1.63366569265335E-08	6.83141794488995E-09	6.56191494202182E-10	4.10837477413985E-11	1.32214852651217E-09	3.81523959737362E-10
491990	4157290	236.677001953125	1.56646458542653E-08	1.59353987316189E-09	1.85230761713168E-08	7.69991277155714E-09	7.71120408327353E-10	4.69971797359415E-11	1.55599747777864E-09	4.48010205431099E-10
492190	4157290	244.369995117188	1.7508627585461E-08	1.72861968698094E-09	2.0995686710835E-08	8.67803169996668E-09	9.05408442790709E-10	5.37589748349027E-11	1.82953979387266E-09	5.2566763032179E-10
492390	4157290	250.783004760742	1.95790233526993E-08	1.87457824347118E-09	2.37905565873239E-08	9.77932153497108E-09	1.06212364363333E-09	6.14880927200673E-11	2.14910448573492E-09	6.16265469642572E-10
492590	4157290	268.316986083984	2.19049299057712E-08	2.03234618189169E-09	2.69479789328492E-08	1.10189074259996E-08	1.24477252863455E-09	7.03190349606666E-11	2.52192957314333E-09	7.2182593216624E-10
492790	4157290	294.5419921875	2.45192000407666E-08	2.20295096049595E-09	3.05128938489809E-08	1.24136521226114E-08	1.45735092997862E-09	8.04035724752441E-11	2.95626792722082E-09	8.44653595369161E-10
492990	4157290	299.036987304688	2.74588899001327E-08	2.38752687255243E-09	3.45353358054607E-08	1.39823237032425E-08	1.70439768277833E-09	9.19124952789998E-11	3.46149913435986E-09	9.87366417067968E-10
493190	4157290	305.320007324219	3.0765748837849E-08	2.58732388341258E-09	3.90709040981454E-08	1.57457708613656E-08	1.99105049036318E-09	1.050373594528E-10	4.04824590406241E-09	1.15292795249342E-09
493390	4157290	309.441986083984	3.44867542994322E-08	2.8037230432675E-09	4.4181253036292E-08	1.77271095135644E-08	2.3231029400134E-09	1.19992429995849E-10	4.72849290291794E-09	1.34468035998327E-09
493590	4157290	315.341003417969	3.8674688515665E-08	3.03825027786867E-09	4.99345964010337E-08	1.99519135110811E-08	2.70706104621282E-09	1.37016511386989E-10	5.51570506351655E-09	1.56637718464804E-09
493790	4157290	320.024993896484	4.33887651230192E-08	3.29258780440816E-09	5.64062189514406E-08	2.24484063676446E-08	3.15019780837762E-09	1.56374594028171E-10	6.42494146084691E-09	1.82221482889931E-09
493990	4157290	322.786010742188	4.86953002309819E-08	3.5685905974045E-09	6.36789865415297E-08	2.52476557151016E-08	3.66060329154467E-09	1.7835954001448E-10	7.47295976735145E-09	2.1168615482893E-09
494190	4157290	330.248992919922	5.4668423386211E-08	3.86829683542288E-09	7.18438409190716E-08	2.83837583748781E-08	4.24722675829739E-09	2.03293228745709E-10	8.67830484331253E-09	2.45548183471654E-09
494390	4157290	330.885986328125	6.13908375507533E-08	4.1939430053156E-09	8.10002688110188E-08	3.18940191330422E-08	4.91990761135978E-09	2.31527390310891E-10	1.00613738839878E-08	2.84375434055705E-09
494590	4157290	322.342010498047	6.89546287184664E-08	4.54798263163369E-09	9.12567331716083E-08	3.58191181853675E-08	5.68939045776036E-09	2.63443975302563E-10	1.16444486043716E-08	3.28788070297158E-09
494790	4157290	318.028015136719	7.74620798828935E-08	4.93309650478255E-09	1.02731017397124E-07	4.02032417447462E-08	6.56731888494366E-09	2.99454641353365E-10	1.34516833975958E-08	3.79458201995362E-09
494990	4157290	319.829010009766	8.70265220910721E-08	5.35220513575901E-09	1.15550485000268E-07	4.50941835796641E-08	7.56620186589638E-09	3.39999328922716E-10	1.55090366982158E-08	4.37107956483205E-09
495190	4157290	317.734985351562	9.77731955043548E-08	5.80847694787344E-09	1.29852212568634E-07	5.05433981178895E-08	8.69934579859716E-09	3.85543572618727E-10	1.7844131058247E-08	5.02505562829902E-09
495390	4157290	315.959991455078	1.0984015902545E-07	6.30533618888273E-09	1.45782996526804E-07	5.66060078535389E-08	9.98074460368047E-09	4.36574293525482E-10	2.04860259830958E-08	5.76459006173663E-09
495590	4157290	310.614013671875	1.23379162661355E-07	6.84647152207684E-09	1.63499142180971E-07	6.33407326656077E-08	1.14249195630077E-08	4.93594039807044E-10	2.34648865209271E-08	6.59806797858723E-09
495790	4157290	304.497009277344	1.38556503975859E-07	7.43583587397404E-09	1.83166024197508E-07	7.08097311021003E-08	1.3046700444879E-08	5.57112996053943E-10	2.68115299904015E-08	7.53405343359683E-09
495990	4157290	299.605010986328	1.55553857397245E-07	8.0776388909956E-09	2.04957373470604E-07	7.90783382514148E-08	1.48609396882549E-08	6.27638682897769E-10	3.05568336473682E-08	8.58112445179347E-09
496190	4157290	298.273986816406	1.74569064134539E-07	8.77633582752159E-09	2.29054244177537E-07	8.82146859874795E-08	1.6882152069698E-08	7.05663066761558E-10	3.47309875667016E-08	9.74766502303018E-09
496390	4157290	302.290985107422	1.95816877471124E-07	9.53661434112297E-09	2.55643617807756E-07	9.82891909501925E-08	1.91240737965298E-08	7.91646931030917E-10	3.93625800428396E-08	1.10416105789483E-08
496590	4157290	296.106994628906	2.19529655424646E-07	1.03633759793475E-08	2.84916605190183E-07	1.09373894147272E-07	2.15991374452045E-08	8.86001604524278E-10	4.44775077157961E-08	1.2470144951866E-08
496790	4157290	298.915008544922	2.45957990753073E-07	1.12616880129799E-08	3.17066207819389E-07	1.21541622633017E-07	2.43178610554787E-08	9.89066609467923E-10	5.00977090330716E-08	1.40393473900327E-08
496990	4157290	312.660003662109	2.75371322275674E-07	1.22367385766562E-08	3.52284626399312E-07	1.3486499001617E-07	2.72881570499675E-08	1.10108506556197E-09	5.62397302663633E-08	1.57537934283156E-08
497190	4157290	299.536010742188	3.08058597728077E-07	1.32938025049803E-08	3.90760127474209E-07	1.49415244450634E-07	3.05145711889682E-08	1.22217750300133E-09	6.29131448062755E-08	1.76161156008314E-08
497390	4157290	315.231994628906	3.44329010779293E-07	1.4438191098687E-08	4.3267347718224E-07	1.65260950230981E-07	3.39974672990265E-08	1.35231334963483E-09	7.011886038333E-08	1.96265326629451E-08
497590	4157290	317.848999023438	3.84512788939908E-07	1.56751804288296E-08	4.78193947046913E-07	1.82466501316221E-07	3.77321828655704E-08	1.49128108197453E-09	7.78473661156286E-08	2.17823618414801E-08
497790	4157290	334.359008789062	4.28962377738481E-07	1.70099457781618E-08	5.27475085159795E-07	2.01090554190241E-07	4.17081898409572E-08	1.63865887438397E-09	8.60769897038054E-08	2.40775341474156E-08
497990	4157290	338.582000732422	4.78054333467732E-07	1.84475195698768E-08	5.80650450916359E-07	2.2118446263905E-07	4.59083032019193E-08	1.79378701629721E-09	9.47722533980272E-08	2.65021372346817E-08
498190	4157290	329.5	5.32191870254673E-07	1.99927475686427E-08	6.37829405221327E-07	2.42790731452047E-07	5.0307988441148E-08	1.9557439108831E-09	1.03882434948286E-07	2.90420153613531E-08
498390	4157290	344.735992431641	5.91808583760835E-07	2.16502707830759E-08	6.9909332681735E-07	2.65941640290201E-07	5.48748261038844E-08	2.12332771902125E-09	1.13340454121575E-07	3.16784600127702E-08
498590	4157290	344.384002685547	6.57373788512675E-07	2.34245512908819E-08	7.64492636522348E-07	2.9065818708256E-07	5.95681958644502E-08	2.2950461227607E-09	1.23062214297695E-07	3.43880274200763E-08
498790	4157290	352.497009277344	7.2939995040006E-07	2.53199243461222E-08	8.34045075722816E-07	3.16949500632143E-07	6.43392425919256E-08	2.46911536343092E-09	1.32946529462825E-07	3.71425184531905E-08
498990	4157290	369.869995117188	8.08452819723146E-07	2.73407344534544E-08	9.07735762388742E-07	3.44812948088231E-07	6.91311831521641E-08	2.64347198383501E-09	1.42875757616193E-07	3.9909155565706E-08
499190	4157290	373.697998046875	8.95164888912393E-07	2.94915577508258E-08	9.8551958723551E-07	3.742351416971E-07	7.3880001441905E-08	2.81579840483501E-09	1.52717239548108E-07	4.26509839187859E-08
499390	4157290	386.470001220703	9.90252813549961E-07	3.17775331341641E-08	1.06732651665313E-06	4.05194063551379E-07	7.85155623413286E-08	2.98356354469414E-09	1.62325606615786E-07	4.53275144795791E-08
499590	4157290	382.630004882812	1.0945393734691E-06	3.42048037212465E-08	1.15307031360375E-06	4.37662493727384E-07	8.29631515394499E-08	3.14407814926899E-09	1.71545972426164E-07	4.78956128121882E-08
499790	4157290	395.058990478516	1.20898042251571E-06	3.67811003320212E-08	1.24266106221485E-06	4.71612901213862E-07	8.71454198860429E-08	3.2945647841978E-09	1.80217963584181E-07	5.03106216093608E-08
499990	4157290	403.196014404297	1.33469701533838E-06	3.95164561335935E-08	1.33602165589952E-06	5.07023848332834E-07	9.0984677360066E-08	3.43223977627366E-09	1.88180476588031E-07	5.25276849654857E-08
500190	4157290	403.859008789062	1.47301255407201E-06	4.24240539773048E-08	1.43310810373995E-06	5.43887857251525E-07	9.44054491855484E-08	3.55440422634145E-09	1.95276979152239E-07	5.45032239876457E-08
500390	4157290	418.591003417969	1.62549543426276E-06	4.55212139928434E-08	1.5339331151662E-06	5.82220548704186E-07	9.73371765507869E-08	3.65854106520968E-09	2.01361110635951E-07	5.61964963289864E-08
500590	4157290	410.016998291016	1.79400852022358E-06	4.88304509955153E-08	1.63859192958816E-06	6.22070635157474E-07	9.97169169757946E-08	3.74241125430479E-09	2.06302283225249E-07	5.7571155294126E-08
500790	4157290	429.709014892578	1.98073798219952E-06	5.23805652033198E-08	1.74728887962919E-06	6.63530199996948E-07	1.01491886731024E-07	3.80414416794466E-09	2.09990956156953E-07	5.85967177856851E-08
500990	4157290	439.519989013672	2.18840276669485E-06	5.6210318324718E-08	1.8604081731427E-06	7.0676257935533E-07	1.02621685426001E-07	3.84231696055651E-09	2.12343250664573E-07	5.92498489652443E-08
501190	4157290	437.063995361328	2.42070820670885E-06	6.03764606923862E-08	1.97865899757502E-06	7.52059833717187E-07	1.03080054054313E-07	3.85601680937919E-09	2.13304597957164E-07	5.95153773765231E-08
501390	4157290	440.361999511719	2.68163997648175E-06	6.49418395017595E-08	2.10287145213081E-06	7.99761539811117E-07	1.02856043803573E-07	3.84488120141979E-09	2.12852167216642E-07	5.93869697466449E-08
501590	4157290	421.084991455078	2.97580937034379E-06	6.99814616165629E-08	2.23410096234371E-06	8.50296330285054E-07	1.01954514595003E-07	3.80911604326133E-09	2.10995901004711E-07	5.88674194346391E-08
501790	4157290	419.380004882812	3.30917769549919E-06	7.55951681951525E-08	2.37380493430812E-06	9.04253719742278E-07	1.00395925194923E-07	3.74948756007173E-09	2.07778082646098E-07	5.7968525518515E-08
501990	4157290	405.951995849609	3.68867907728617E-06	8.1900952943994E-08	2.52373336854561E-06	9.62340378898939E-07	9.82154300921702E-08	3.66728913563175E-09	2.03271466328951E-07	5.67105715360165E-08
502190	4157290	393.355987548828	4.12045831404784E-06	8.90043515953454E-08	2.68540932140304E-06	1.02517316939369E-06	9.54613479818E-08	3.56428611977393E-09	1.97576103588707E-07	5.51214416222881E-08
502390	4157290	389.325012207031	4.61205357773143E-06	9.70357503365251E-08	2.86073251010996E-06	1.09352071880059E-06	9.21931087194193E-08	3.44264196534712E-09	1.90815088142374E-07	5.32354354988436E-08
502590	4157290	386.010009765625	5.17204847029383E-06	1.06144046184898E-07	3.05183972613589E-06	1.16824902235321E-06	8.84788171689496E-08	3.30482961252811E-09	1.83129507049133E-07	5.10918617174028E-08
502790	4157290	376.023010253906	5.80979504164107E-06	1.16491532560314E-07	3.26098142268473E-06	1.25027366210604E-06	8.43925930151622E-08	3.15353732122555E-09	1.74672924728418E-07	4.87335026888275E-08
502990	4157290	382.744995117188	6.53532493711371E-06	1.28251976319834E-07	3.490451584075E-06	1.34053328503372E-06	8.00118454398473E-08	2.99157063275296E-09	1.65605732973856E-07	4.62050412587717E-08
503190	4157290	379.481994628906	7.35854058292787E-06	1.41596139800342E-07	3.74233955141612E-06	1.43989083192803E-06	7.5414634449258E-08	2.82175740424625E-09	1.56089680852715E-07	4.35515373426453E-08
503390	4157290	389.157989501953	8.28568909042802E-06	1.5662898941292E-07	4.01761120386391E-06	1.5487619684481E-06	7.06772495272573E-08	2.6468608923003E-09	1.46282854603304E-07	4.08170300542622E-08
503590	4157290	384.438995361328	9.32333453413211E-06	1.73458220679394E-07	4.31701068186388E-06	1.66748416132251E-06	6.58721068628212E-08	2.4695042886399E-09	1.36335317912119E-07	3.80433237339038E-08
503790	4157290	376.0419921875	1.04756209781857E-05	1.92153055232585E-07	4.64045353992948E-06	1.79607144157427E-06	6.10660337128434E-08	2.29210913445812E-09	1.26385554775801E-07	3.52689974474284E-08
503990	4157290	379.157989501953	1.17430975749223E-05	2.12718235889525E-07	4.98661958844427E-06	1.93405091486267E-06	5.63189751008924E-08	2.11684887113097E-09	1.16557787958569E-07	3.25286582819054E-08
504190	4157290	375.256011962891	1.31299786396444E-05	2.35206929403321E-07	5.35389757558718E-06	2.08087574673924E-06	5.16831272535824E-08	1.94561768439643E-09	1.0696018218775E-07	2.98524409826931E-08
504390	4157290	360.985992431641	1.46347712587598E-05	2.59571118476574E-07	5.73884621648627E-06	2.23527434713143E-06	4.7202476330134E-08	1.78001407912549E-09	9.7683887350865E-08	2.72657416303832E-08
504590	4157290	349.078002929688	1.62487398366585E-05	2.85634894389802E-07	6.13586777710534E-06	2.39511554785749E-06	4.29127005212254E-08	1.62133709339335E-09	8.88028355933108E-08	2.47891609411619E-08
504790	4157290	338.247009277344	1.7957696437474E-05	3.13121262305519E-07	6.53747435246572E-06	2.5575217948662E-06	3.88413808491037E-08	1.47059338904857E-09	8.03741787122594E-08	2.24386257068691E-08
504990	4157290	344.878997802734	1.97431016122023E-05	3.41670381828532E-07	6.93461727885677E-06	2.71899962387143E-06	3.50084593735305E-08	1.32851375095546E-09	7.24392376866749E-08	2.02256532397679E-08
505190	4157290	353.407989501953	2.15858536712971E-05	3.70904072702035E-07	7.31768536554241E-06	2.87584096328194E-06	3.14268812453829E-08	1.19557656972693E-09	6.50248328662697E-08	1.81577221022457E-08
505390	4157290	355.511993408203	2.34740693409728E-05	4.00558495152753E-07	7.67845122811245E-06	3.02491001410927E-06	2.81033591528796E-08	1.07203497471876E-09	5.81448689548699E-08	1.62387132260209E-08
505590	4157290	360.585998535156	2.54139596023832E-05	4.30678535779623E-07	8.01284839728255E-06	3.1647692521846E-06	2.50392062487794E-08	9.57946619695141E-10	5.18020616345558E-08	1.44693906190879E-08
505790	4157290	359.059997558594	2.70794293088069E-05	4.56094233898496E-07	8.2692392859078E-06	3.27348582561589E-06	2.22311907693821E-08	8.53204334645337E-10	4.59897090486466E-08	1.28478946295567E-08
505990	4157290	352.028015136719	2.55692131185781E-05	4.30969162885473E-07	8.01119960816847E-06	3.164317096656E-06	1.96723745075465E-08	7.57566225044746E-10	4.06934297652196E-08	1.13702258962548E-08
506190	4157290	348.259002685547	2.29849422442235E-05	3.88594922791962E-07	7.55771061565935E-06	2.97361855618148E-06	1.73529063149386E-08	6.70684182072904E-10	3.58928074728135E-08	1.00307033473924E-08
506390	4157290	348.403991699219	2.05122481632193E-05	3.47800739061053E-07	7.09121674242651E-06	2.77924422216211E-06	1.52607503089545E-08	5.92130115510332E-10	3.1562900234614E-08	8.82238453460758E-09
506590	4157290	343.351989746094	1.82294208167508E-05	3.0990425816672E-07	6.62781536824728E-06	2.58784335238007E-06	1.33823358560732E-08	5.21419255479695E-10	2.76755876624721E-08	7.73744074322222E-09
506790	4157290	341.975006103516	1.61495976754287E-05	2.75180069079094E-07	6.17361675528275E-06	2.40179551336086E-06	1.17031229832875E-08	4.58030598636751E-10	2.42007426151495E-08	6.76748337457135E-09
506990	4157290	342.424011230469	1.42716228601911E-05	2.4366088386887E-07	5.73224176619567E-06	2.22242758164472E-06	1.02080817694422E-08	4.01424260650883E-10	2.11072245724134E-08	5.90384066852415E-09
507190	4157290	332.401000976562	1.25874254437284E-05	2.1525550030341E-07	5.30597669173052E-06	2.05050575459884E-06	8.88208821903823E-09	3.51055776731431E-10	1.83636999204586E-08	5.13778618812349E-09
507390	4157290	329.054992675781	1.10849248433527E-05	1.89797677339433E-07	4.89630475043214E-06	1.8864585257622E-06	7.71024197238992E-09	3.06387636022956E-10	1.5939300178558E-08	4.46072220735895E-09
507590	4157290	327.272003173828	9.7499185992686E-06	1.67078992758218E-07	4.50425409812629E-06	1.73052323025334E-06	6.67811299711976E-09	2.66898333924091E-10	1.38041329612763E-08	3.8643221421306E-09
507790	4157290	323.860992431641	8.567404356214E-06	1.46872202927861E-07	4.13060825004537E-06	1.58283688970687E-06	5.77192528469429E-09	2.32088958373119E-10	1.19296625410231E-08	3.34063651775102E-09
507990	4157290	324.294006347656	7.52246339926992E-06	1.28947018376326E-07	3.77600693373152E-06	1.44348268655654E-06	4.97868625861334E-09	2.0148796375336E-10	1.02889777811682E-08	2.88216767537194E-09
508190	4157290	322.924987792969	6.60080843614035E-06	1.13080015065342E-07	3.44097261486835E-06	1.31250587860945E-06	4.28627033302496E-09	1.74654433994216E-10	8.85696493264973E-09	2.48191808737698E-09
508390	4157290	322.269989013672	5.78909037735769E-06	9.90603173133562E-08	3.1258965018093E-06	1.18991239306825E-06	3.68346449569854E-09	1.51179762967995E-10	7.61040191851574E-09	2.13341664661268E-09
508590	4157290	311.032012939453	5.07504245556283E-06	8.66924357027586E-08	2.83101020727692E-06	1.0756604266909E-06	3.1599834413678E-09	1.30688326712746E-10	6.52798945688832E-09	1.83072743070823E-09
508790	4157290	303.915008544922	4.44752061689303E-06	7.57972911761741E-08	2.55635999408059E-06	9.69651816792272E-07	2.7064607790995E-09	1.12837266993803E-10	5.59033263445362E-09	1.56844464649739E-09
508990	4157290	296.927001953125	3.89648156779924E-06	6.6212150443127E-08	2.30179235274067E-06	8.7172680214172E-07	2.31442208476769E-09	9.73156016199394E-11	4.77988488985211E-09	1.34167709082551E-09
509190	4157290	298.877990722656	3.41292600773116E-06	5.77899542988857E-08	2.06695361842619E-06	7.816634584431E-07	1.97624475775151E-09	8.38428946594824E-11	4.08086463384374E-09	1.14602501666412E-09
509390	4157290	316.14599609375	2.98882452186892E-06	5.03983359551549E-08	1.85130253199246E-06	6.99181603569181E-07	1.68510873190302E-09	7.21675177480495E-11	3.47915301247226E-09	9.77551687849572E-10
509590	4157290	309.109985351562	2.61703674520738E-06	4.39185131960534E-08	1.65413271509192E-06	6.23950197415885E-07	1.43494147820809E-09	6.20647234862493E-11	2.96217983825668E-09	8.32751651601533E-10
509790	4157290	298.986999511719	2.29122994510884E-06	3.82441582475917E-08	1.47460142292024E-06	5.55596991372826E-07	1.22036002066179E-09	5.33346561056357E-11	2.51880329922164E-09	7.08517311508833E-10
509990	4157290	299.087005615234	2.00580038947912E-06	3.32802969279564E-08	1.31176114868262E-06	4.93719224834025E-07	1.03661204707278E-09	4.58002894880818E-11	2.13918784664721E-09	6.02104963166318E-10
510190	4157290	294.578002929688	1.75579921036313E-06	2.89422628050656E-08	1.16459127857362E-06	4.37894374928942E-07	8.7951773911552E-10	3.93053574656087E-11	1.81468361952695E-09	5.1110123249751E-10
510390	4157290	284.927001953125	1.53686352771374E-06	2.51547208052371E-08	1.03202777340136E-06	3.87690238778558E-07	7.45413535768819E-10	3.37123627798614E-11	1.53770987514185E-09	4.3339063643096E-10
510590	4157290	282.781005859375	1.34515306961699E-06	2.18507614119651E-08	9.12989572738266E-07	3.42673878642915E-07	6.31098670562001E-10	2.89006805360305E-11	1.30164418165365E-09	3.67124744168556E-10
510790	4157290	259.914001464844	1.17729225242675E-06	1.89710655825908E-08	8.06401044448424E-07	3.02419185800567E-07	5.3378503928371E-10	2.47647763739214E-11	1.10071852426746E-09	3.10693259909785E-10
510990	4157290	233.279998779297	1.03031753736209E-06	1.64631350833577E-08	7.1121026108257E-07	2.66512980940451E-07	4.51050715836013E-10	2.12125308760897E-11	9.29923002525265E-10	2.62697200853738E-10
511190	4157290	217.059005737305	9.01629815281506E-07	1.42805884038709E-08	6.26403230100448E-07	2.34559696944903E-07	3.80797302210773E-10	1.81637345972553E-11	7.84917442850331E-10	2.21924303909811E-10
511390	4157290	208.968994140625	7.8895153093282E-07	1.23825159742485E-08	5.51014408464852E-07	2.06184759251349E-07	3.21211091219986E-10	1.55486907303893E-11	6.61950946615981E-10	1.87326620231807E-10
511590	4157290	202.647994995117	6.90288241170715E-07	1.0732892321927E-08	4.84133949033517E-07	1.81036823648568E-07	2.70727976571679E-10	1.33069527991878E-11	5.57789204827412E-10	1.58000272812044E-10
511790	4157290	222.695999145508	6.03894291319023E-07	9.30004121679838E-09	4.24912173353205E-07	1.58789047369263E-07	2.28001942219103E-10	1.13861778229991E-11	4.69649237589878E-10	1.33167271934593E-10
511990	4157290	192.195999145508	5.28242289417528E-07	8.05615127741E-09	3.72561760954231E-07	1.39139568634773E-07	1.91876946959583E-10	9.74111705651375E-12	3.95141162482879E-10	1.12159299526222E-10
512190	4157290	183.298004150391	4.61996059651983E-07	6.9768381429069E-09	3.26358119427282E-07	1.21811359627056E-07	1.61361960800019E-10	8.33271690330237E-12	3.32216498546471E-10	9.4403311189059E-11
512390	4157290	183.100006103516	4.03986761340104E-07	6.04075021983416E-09	2.85638353917041E-07	1.06551601984202E-07	1.35608893198675E-10	7.12731328511343E-12	2.79122466838017E-10	7.94088003905232E-11
512590	4157290	167.970001220703	3.53191866889144E-07	5.22921445010204E-09	2.49799189473413E-07	9.31307100466963E-08	1.1389316787714E-10	6.09592184831284E-12	2.34361774534523E-10	6.67565902314192E-11
512790	4157290	129.365005493164	3.08716707279842E-07	4.5259193035479E-09	2.18294150480717E-07	8.13411098169163E-08	9.55966946432478E-11	5.21361760322697E-12	1.96657364846089E-10	5.60890105070564E-11
512990	4157290	135.425003051758	2.69778303489624E-07	3.91663069693996E-09	1.90630241768527E-07	7.09958591327569E-08	8.01929872687913E-11	4.45898494629541E-12	1.64921615021243E-10	4.71013084898128E-11
513190	4157290	92.5390014648438	2.35691233692882E-07	3.38893924264122E-09	1.66364338266579E-07	6.19271826739988E-08	6.72341993130058E-11	3.81363422233612E-12	1.38229503881352E-10	3.95341634391827E-11
513390	4157290	74.1600036621094	2.05855295662354E-07	2.93203683582483E-09	1.45099442010166E-07	5.39849778346598E-08	5.63398748444884E-11	3.26179076539862E-12	1.15795331223251E-10	3.31671982150155E-11
513590	4157290	49.7290000915527	1.79744747651658E-07	2.53651841450151E-09	1.26480920222964E-07	4.70353298417999E-08	4.71872076557568E-11	2.78993565225806E-12	9.69525642367699E-11	2.78133598395075E-11
513790	4157290	51.685001373291	1.56898927921093E-07	2.19420599250182E-09	1.1019281328301E-07	4.09590663209692E-08	3.95026228618018E-11	2.38648973040966E-12	8.11364211125248E-11	2.33140592186838E-11
513990	4157290	29.8309993743896	1.36914082163249E-07	1.89799325446673E-09	9.59542806214426E-08	3.56503747806648E-08	3.30545207612305E-11	2.04153505324908E-12	6.78688633880495E-11	1.95349784316959E-11
514190	4157290	7.70100021362305	1.19436242890464E-07	1.64170938615255E-09	8.35162279690142E-08	3.10154978461296E-08	2.76470402714504E-11	1.74658409992498E-12	5.67456928069401E-11	1.63624723686291E-11
514390	4157290	0	1.04155023390815E-07	1.41999923830654E-09	7.26581438569104E-08	2.69715144673277E-08	2.31147100103611E-11	1.49437783402424E-12	4.74254926211787E-11	1.37004816882815E-11
514590	4157290	0	9.0798205814386E-08	1.22821789148449E-09	6.31851595558614E-08	2.34452109937919E-08	1.93178626420506E-11	1.27870822507098E-12	3.96201462868829E-11	1.1467882916546E-11
514790	4157290	0	7.91270192120999E-08	1.06233842782582E-09	5.49253394053702E-08	2.03720438701864E-08	1.61387153135206E-11	1.09426742668457E-12	3.30867342268749E-11	9.59622432909291E-12
482590	4157490	209.574005126953	8.78938805486098E-11	1.85925410968483E-11	4.34747498587027E-11	2.75838818789639E-11	3.00308281896892E-13	9.53207340925058E-14	4.8141173318283E-13	1.97956615010167E-13
482790	4157490	204.561004638672	9.91494633923979E-11	2.08004578320171E-11	4.98050660455483E-11	3.12805857709958E-11	3.55536910765884E-13	1.09573863823585E-13	5.76134128648452E-13	2.33598939607572E-13
482990	4157490	234.078994750977	1.1181222968162E-10	2.32598384639753E-11	5.7043175480365E-11	3.54656839302025E-11	4.21036460380181E-13	1.25913042079511E-13	6.89413812553336E-13	2.7570513280391E-13
483190	4157490	242.063003540039	1.26051680031799E-10	2.59976757269332E-11	6.53171581038552E-11	4.02026490105788E-11	4.98732688848247E-13	1.44637489039394E-13	8.24867604426371E-13	3.25456137012839E-13
483390	4157490	221.904006958008	1.42056679099438E-10	2.90436135929451E-11	7.47728678817712E-11	4.55630609319962E-11	5.90913962212471E-13	1.66088687951106E-13	9.86812766315048E-13	3.84250075992772E-13
483590	4157490	252.016998291016	1.60037524369044E-10	3.24301714340033E-11	8.55763611290113E-11	5.16276260951835E-11	7.00299510581422E-13	1.90656284322557E-13	1.18040156185683E-12	4.53742345836283E-13
483790	4157490	286.868011474609	1.80228230106238E-10	3.61930105721884E-11	9.79166554659193E-11	5.84873429680379E-11	8.30120558128359E-13	2.18785100152418E-13	1.41178145332897E-12	5.35893338056494E-13
483990	4157490	312.220001220703	2.0288900028898E-10	4.0371119458971E-11	1.12008850793767E-10	6.62447461090502E-11	9.84216270210194E-13	2.50982235905509E-13	1.68828551102348E-12	6.33024255608863E-13
484190	4157490	323.977996826172	2.28308990276584E-10	4.50071012474568E-11	1.28097680294166E-10	7.50153708250766E-11	1.16714798050486E-12	2.87826021421203E-13	2.01865903229894E-12	7.47883909425985E-13
484390	4157490	294.294006347656	2.56809337751746E-10	5.01474742894403E-11	1.46461539864091E-10	8.49293986310718E-11	1.3843346973724E-12	3.29976334357794E-13	2.41332896887854E-12	8.83727895296709E-13
484590	4157490	302.524993896484	2.88746484883205E-10	5.58429427083717E-11	1.67417054329042E-10	9.61334771086715E-11	1.64221360969727E-12	3.78185882277787E-13	2.88472399658484E-12	1.04441193616387E-12
484790	4157490	292.200012207031	3.24515866861984E-10	6.21487248768328E-11	1.91324260059787E-10	1.08792799119142E-10	1.94843043860458E-12	4.33313279833064E-13	3.44765474301889E-12	1.23450252929174E-12
484990	4157490	256.472991943359	3.64555958420851E-10	6.91248671923752E-11	2.18592483339982E-10	1.23093423487722E-10	2.3120650358607E-12	4.96338027655075E-13	4.11976523425871E-12	1.45940791593339E-12
485190	4157490	243.960998535156	4.09352764466556E-10	7.68366038238385E-11	2.49687008708113E-10	1.39244909987722E-10	2.74389888710765E-12	5.68377992815006E-13	4.92206865639425E-12	1.72553329421226E-12
485390	4157490	248.113998413086	4.59444745250138E-10	8.53546609628696E-11	2.85136641136908E-10	1.57483241107008E-10	3.25673104572197E-12	6.50708398839364E-13	5.87958282755082E-12	2.04046363762298E-12
485590	4157490	229.003997802734	5.15428304972869E-10	9.4755618421286E-11	3.25542283477498E-10	1.78074146633145E-10	3.86575258202576E-12	7.44784226911575E-13	7.02208359252449E-12	2.41318035574687E-12
485790	4157490	231.755996704102	5.77963869333632E-10	1.05122256541535E-10	3.71586663391385E-10	2.01316833336919E-10	4.58898920078218E-12	8.52265465608727E-13	8.38499749938276E-12	2.85431705980639E-12
485990	4157490	198.475997924805	6.47782700071612E-10	1.16543999081302E-10	4.24045362599235E-10	2.27548245717403E-10	5.44782555916091E-12	9.75047322868113E-13	1.00104589460464E-11	3.37646267918184E-12
486190	4157490	148.968002319336	7.25694457616727E-10	1.29117355542712E-10	4.83799300535417E-10	2.57147850845429E-10	6.46762471298122E-12	1.11529481574024E-12	1.19485620081536E-11	3.99451952780214E-12
486390	4157490	70.0749969482422	8.12595651300894E-10	1.42946262339785E-10	5.51848940797171E-10	2.90542979655678E-10	7.67845804061012E-12	1.27548026600722E-12	1.42588393831214E-11	4.72612385807111E-12
486590	4157490	78.3499984741211	9.0947905847494E-10	1.58142398432667E-10	6.29330317057708E-10	3.28214807976144E-10	9.11596603938136E-12	1.45842552637762E-12	1.70120097276925E-11	5.59214121177409E-12
486790	4157490	77.6809997558594	1.01744444342166E-09	1.74825749091533E-10	7.17533290562588E-10	3.70705301146449E-10	1.08223769997837E-11	1.66735506493005E-12	2.02920445529228E-11	6.61725466575454E-12
486990	4157490	75.9980010986328	1.13771057645454E-09	1.93125068539117E-10	8.17922195553948E-10	4.18624954944645E-10	1.28477057751111E-11	1.90595455331782E-12	2.41986057123461E-11	7.83065560055273E-12
487190	4157490	75.4899978637695	1.27162879351075E-09	2.13178321118212E-10	9.32159210892575E-10	4.72661505804022E-10	1.52511648217589E-11	2.17843729703005E-12	2.88499189578701E-11	9.26685610876942E-12
487390	4157490	75.1719970703125	1.42069836813054E-09	2.35133174547746E-10	1.06213084714973E-09	5.33589797801768E-10	1.81028248358008E-11	2.48962116812114E-12	3.43861597717218E-11	1.09666452489559E-11
487590	4157490	76.5579986572266	1.58658396719907E-09	2.59147520154738E-10	1.2099779379875E-09	6.02282930533228E-10	2.14855669705504E-11	2.84501697875213E-12	4.09734385638058E-11	1.29782129770156E-11
487790	4157490	83.3290023803711	1.77113555144609E-09	2.85390163902251E-10	1.37812959968331E-09	6.7972494723154E-10	2.54973766967858E-11	3.25093285304315E-12	4.88084870889843E-11	1.53584721696874E-11
487990	4157490	84.3040008544922	1.97641101884529E-09	3.14041453565148E-10	1.56934163961444E-09	7.67025086245347E-10	3.0254034159333E-11	3.71459207926575E-12	5.81241628302866E-11	1.81746079137335E-11
488190	4157490	85.7379989624023	2.20470186246407E-09	3.45293133238093E-10	1.78673995990105E-09	8.65433338922821E-10	3.58922607323718E-11	4.24424988130408E-12	6.91959051637635E-11	2.15058789228038E-11
488390	4157490	109.005996704102	2.45856372211952E-09	3.79350005138614E-10	2.03387179228046E-09	9.76359988781172E-10	4.25734166854431E-11	4.84936671408467E-12	8.23493061279555E-11	2.54457566700188E-11
488590	4157490	119.596000671387	2.74085053693862E-09	4.16430439057018E-10	2.31476257825266E-09	1.10139644832709E-09	5.04878140577138E-11	5.54077916898872E-12	9.79689676380111E-11	3.01044046179985E-11
488790	4157490	122.593002319336	3.05475155362147E-09	4.56767167817159E-10	2.63397342543347E-09	1.24233648647138E-09	5.98597547231469E-11	6.330902338565E-12	1.16508854432279E-10	3.56115780294118E-11
488990	4157490	124.011001586914	3.40383669554779E-09	5.00608316768903E-10	2.99667460888662E-09	1.4012033918156E-09	7.09534046725521E-11	7.23396250649884E-12	1.38504376662502E-10	4.21200056832681E-11
489190	4157490	123.515998840332	3.7921074897178E-09	5.48218539842379E-10	3.40872550493432E-09	1.58027952350354E-09	8.40796326270901E-11	8.26626402134309E-12	1.645864687742E-10	4.98093271889836E-11
489390	4157490	123.139999389648	4.22405545090678E-09	5.99880361459047E-10	3.87676458666279E-09	1.78213962199045E-09	9.96039582370805E-11	9.44649610653632E-12	1.95497965602796E-10	5.88906700908583E-11
489590	4157490	125.060997009277	4.70472931958422E-09	6.55895819961996E-10	4.40831110095768E-09	2.00968852509098E-09	1.17955774671481E-10	1.07960856541548E-11	2.32112616994605E-10	6.96119619035838E-11
489790	4157490	133.341003417969	5.23981120132026E-09	7.16587766044979E-10	5.0118788180153E-09	2.26620301620696E-09	1.39639014422518E-10	1.23395875833406E-11	2.7545712081589E-10	8.22640718365103E-11
489990	4157490	140.804992675781	5.83570406974889E-09	7.82301800134182E-10	5.69710392393958E-09	2.55537918147583E-09	1.65244481198159E-10	1.41051394920018E-11	3.26736600026189E-10	9.71879149603417E-11
490190	4157490	164.121994018555	6.49963202939528E-09	8.53409006844446E-10	6.47488838574177E-09	2.88138585639771E-09	1.9546407600816E-10	1.61249917221976E-11	3.87363992634421E-10	1.14782651567536E-10
490390	4157490	214.996002197266	7.23975109874137E-09	9.30308419390609E-10	7.35755116804773E-09	3.24892073017841E-09	2.31107142447253E-10	1.8436097523331E-11	4.58993868928761E-10	1.35515107165995E-10
490590	4157490	274.339996337891	8.06527546269689E-09	1.01343008429477E-09	8.35899716850367E-09	3.6632732234043E-09	2.73119212267886E-10	2.10807887201647E-11	5.43561236983723E-10	1.59930580849968E-10
490790	4157490	240.634002685547	8.98663453951767E-09	1.10323930668428E-09	9.49494508386215E-09	4.13040937306935E-09	3.22603440362326E-10	2.41075476165275E-11	6.43325937260377E-10	1.88665209589433E-10
490990	4157490	202.764007568359	1.00156346627974E-08	1.20023860328159E-09	1.07831350338088E-08	4.65704794824005E-09	3.8084500498656E-10	2.75718149684165E-11	7.60923254522651E-10	2.22460011177281E-10
491190	4157490	217.126998901367	1.11656484109168E-08	1.30497512023488E-09	1.22435732149571E-08	5.25075341805462E-09	4.49338864031456E-10	3.15370295535043E-11	8.99421432875209E-10	2.62176931722763E-10
491390	4157490	228.986999511719	1.24518267334493E-08	1.41804378949783E-09	1.38988026402288E-08	5.92003559648135E-09	5.29821093576413E-10	3.60756728337777E-11	1.06238673808478E-09	3.08816902464061E-10
491590	4157490	228.723007202148	1.38913387620137E-08	1.5400936933687E-09	1.5774202042296E-08	6.67446149653796E-09	6.24304193060471E-10	4.12704942136742E-11	1.25395675214948E-09	3.63540216854552E-10
491790	4157490	233.878005981445	1.5503640855871E-08	1.67183392756734E-09	1.78983144715766E-08	7.52477757017997E-09	7.35116613606913E-10	4.72158257036818E-11	1.47892251485212E-09	4.27689324285185E-10
491990	4157490	236.569000244141	1.73107791536115E-08	1.81404360270873E-09	2.03032074792205E-08	8.48304598658699E-09	8.64946858372014E-10	5.40191610463864E-11	1.7428200969362E-09	5.02814324410622E-10
492190	4157490	244.352996826172	1.93377255534765E-08	1.96757855984173E-09	2.30248656853278E-08	9.5627904828892E-09	1.01689222208196E-09	6.18027564767359E-11	2.05203199613122E-09	5.90701087643735E-10
492390	4157490	252.13200378418	2.16127528981008E-08	2.1333814324323E-09	2.61036172834494E-08	1.07791565935638E-08	1.19451239761851E-09	7.07054521154473E-11	2.41389863233142E-09	6.93402221440179E-10
492590	4157490	261.433990478516	2.41678509079355E-08	2.31249111118811E-09	2.95845947259777E-08	1.21490838210545E-08	1.40188788916416E-09	8.08846042713095E-11	2.83683991838415E-09	8.13270795505697E-10
492790	4157490	275.076995849609	2.70391864407754E-08	2.50605434118437E-09	3.35182296252783E-08	1.36914915077094E-08	1.64368307462651E-09	9.251819248947E-11	3.33048654731081E-09	9.52996777379449E-10
492990	4157490	300.963012695312	3.02676108254956E-08	2.71533929260883E-09	3.79607808255444E-08	1.54274779301758E-08	1.92521351222797E-09	1.05807087023196E-10	3.90582015877134E-09	1.11564594540029E-09
493190	4157490	309.696990966797	3.38992162794677E-08	2.94174573194692E-09	4.29748932500466E-08	1.73805283112752E-08	2.25251678192895E-09	1.20977271904461E-10	4.57532092737049E-09	1.30470074129604E-09
493390	4157490	312.115997314453	3.79859441682719E-08	3.18681967571152E-09	4.86301843045046E-08	1.95767356355132E-08	2.63242579108707E-09	1.38282237754053E-10	5.3531203800192E-09	1.5241026370194E-09
493590	4157490	317.614013671875	4.25862440660395E-08	3.4522724336968E-09	5.50038527974497E-08	2.20450323905427E-08	3.0726428743968E-09	1.58005484611462E-10	6.25515629296438E-09	1.77829513504821E-09
493790	4157490	322.721984863281	4.77657911435185E-08	3.73999484451973E-09	6.21813023374893E-08	2.48174244455159E-08	3.58181295872229E-09	1.80462778431029E-10	7.29932531897413E-09	2.07226598453837E-09
493990	4157490	324.924987792969	5.35982549825211E-08	4.05207421926249E-09	7.02567703438937E-08	2.79292286819845E-08	4.16959294447878E-09	2.06004418237232E-10	8.50562770351823E-09	2.41158730307656E-09
494190	4157490	332.182006835938	6.01661192264119E-08	4.39081135464699E-09	7.93339485658923E-08	3.1419307600674E-08	4.84671346731325E-09	2.35017135873857E-10	9.8962967077212E-09	2.80245136456643E-09
494390	4157490	332.472991943359	6.75615530799673E-08	4.75873403903614E-09	8.95265793892822E-08	3.53302929435999E-08	5.62502882897953E-09	2.67925377600365E-10	1.14959036057254E-08	3.25169944224492E-09
494590	4157490	329.113006591797	7.58873336545582E-08	5.15862072166699E-09	1.00959010552081E-07	3.97088008180511E-08	6.51754997721208E-09	3.05192332119476E-10	1.33314271769067E-08	3.76684103045189E-09
494790	4157490	321.480987548828	8.52578159156867E-08	5.59351648707763E-09	1.137666902644E-07	4.46056203931023E-08	7.53845362402792E-09	3.47319894140238E-10	1.5432273985504E-08	4.35605920686744E-09
494990	4157490	323.31298828125	9.57999054743481E-08	6.06674688411423E-09	1.28096544477305E-07	5.00758587130477E-08	8.70306005092238E-09	3.94847544296095E-10	1.78302337195253E-08	5.02819794160989E-09
495190	4157490	327.856994628906	1.07654056588325E-07	6.58193152278647E-09	1.44107225368502E-07	5.61790389103005E-08	1.00277708485198E-08	4.48349857431245E-10	2.05593513294168E-08	5.7927262894305E-09
495390	4157490	324.348999023438	1.20975270991532E-07	7.14298927934308E-09	1.61969182449496E-07	6.29791290671572E-08	1.15299567405625E-08	5.08432086761389E-10	2.36556954478922E-08	6.65967360659412E-09
495590	4157490	329.910003662109	1.35934134475282E-07	7.75415213606243E-09	1.81864551989616E-07	7.05445110772788E-08	1.32277846420436E-08	5.75723865064721E-10	2.71570007719735E-08	7.63952989175762E-09
495790	4157490	311.739990234375	1.52717778818238E-07	8.41996820099884E-09	2.0398674762113E-07	7.89478348054681E-08	1.51399726163252E-08	6.50870289702292E-10	3.11021607028682E-08	8.74310441310613E-09
495990	4157490	317.701995849609	1.71530795618561E-07	9.14529302614904E-09	2.28539727464903E-07	8.82657480881615E-08	1.72854611748158E-08	7.34520024553145E-10	3.5530546280537E-08	9.98133598434115E-09
496190	4157490	315.546997070312	1.92596083391166E-07	9.93527732272966E-09	2.55736881656333E-07	9.85784875224177E-08	1.96829899317222E-08	8.27310133582142E-10	4.04811285126501E-08	1.13650485945229E-08
496390	4157490	308.601989746094	2.16155609492418E-07	1.07953502751937E-08	2.85799476626428E-07	1.09969306580363E-07	2.23505699799217E-08	9.29847288747191E-10	4.5991384080565E-08	1.29046468099606E-08
496590	4157490	305.364990234375	2.42471064068029E-07	1.17311978613613E-08	3.18954599799727E-07	1.22523720353313E-07	2.53048453140742E-08	1.04268559116864E-09	5.20959698151429E-08	1.46097472420404E-08
496790	4157490	300.703002929688	2.71824383662193E-07	1.27487084804828E-08	3.5543254523573E-07	1.36328527742103E-07	2.85603385766217E-08	1.16629922890209E-09	5.88251586085517E-08	1.64887428268775E-08
496990	4157490	320.097991943359	3.04518169275496E-07	1.38539128740942E-08	3.95463606102249E-07	1.51470616074249E-07	3.21285846669281E-08	1.30105148309744E-09	6.62030419443588E-08	1.85483024045685E-08
497190	4157490	324.109008789062	3.4087602839857E-07	1.50529241245106E-08	4.39274254174663E-07	1.68035544712426E-07	3.60171620345772E-08	1.4471608118647E-09	7.42455188192613E-08	2.07928113883214E-08
497390	4157490	335.440002441406	3.81242944013561E-07	1.63518817875946E-08	4.87082734524411E-07	1.86105920412311E-07	4.02286401073514E-08	1.60466464787619E-09	8.2958109357138E-08	2.32237641685642E-08
497590	4157490	342.785003662109	4.25985637367259E-07	1.77568599311585E-08	5.39094068119654E-07	2.05759536048518E-07	4.47594702321471E-08	1.77337999514993E-09	9.23336528338196E-08	2.58391234494056E-08
497790	4157490	346.069000244141	4.75493031385206E-07	1.92737617829674E-08	5.95494552419486E-07	2.27067319739202E-07	4.95988628873979E-08	1.95286410190695E-09	1.02349976105912E-07	2.86326717763044E-08
497990	4157490	350.947998046875	5.30177249692997E-07	2.09082299688576E-08	6.56446006490026E-07	2.50091201840646E-07	5.47277045426252E-08	2.14237664391193E-09	1.12967643904186E-07	3.15933859277206E-08
498190	4157490	353.950012207031	5.90475538798804E-07	2.26655811197225E-08	7.22080056185863E-07	2.74882012024189E-07	6.01175803901255E-08	2.34084575478404E-09	1.2412792842655E-07	3.47048724085743E-08
498390	4157490	352.436004638672	6.56853111839333E-07	2.45507444913468E-08	7.92492632067594E-07	3.01477455679252E-07	6.57299800896524E-08	2.5468406371235E-09	1.35751158304381E-07	3.7944908591177E-08
498590	4157490	351.06298828125	7.29807696577473E-07	2.65682441377348E-08	8.67739257315804E-07	3.29900403153166E-07	7.15157715785066E-08	2.7585540600757E-09	1.47735623238251E-07	4.12851387801867E-08
498790	4157490	365.377990722656	8.09876389251731E-07	2.87222166317973E-08	9.47831680399937E-07	3.60157686777041E-07	7.74150304307985E-08	2.97379680088256E-09	1.59957216561154E-07	4.46909751455535E-08
498990	4157490	362.752990722656	8.97645573043871E-07	3.10165138529278E-08	1.0327365300582E-06	3.92239681750649E-07	8.33573092535975E-08	3.19000805497788E-09	1.7226999036929E-07	4.8121752888131E-08
499190	4157490	388.950012207031	9.93764753606204E-07	3.34549154500642E-08	1.12237675838875E-06	4.26120962831923E-07	8.92624192128021E-08	3.40428440393845E-09	1.84507772830598E-07	5.15311812968905E-08
499390	4157490	388.311004638672	1.09896521839047E-06	3.6041471902235E-08	1.21663667905832E-06	4.6176234127777E-07	9.50417743420943E-08	3.61342888250711E-09	1.96486952976888E-07	5.48681198134815E-08
499590	4157490	385.376007080078	1.21408440435448E-06	3.87809890144699E-08	1.31537137834782E-06	4.99114569461809E-07	1.00600318266938E-07	3.81402026501753E-09	2.08010474214859E-07	5.80776901501673E-08
499790	4157490	410.407989501953	1.34009674676177E-06	4.16796942672504E-08	1.41842115377924E-06	5.3812397519025E-07	1.05839014188877E-07	4.00250260456959E-09	2.18872996291582E-07	6.11027137860028E-08
499990	4157490	423.054992675781	1.47815151066753E-06	4.47460890083665E-08	1.52563138027029E-06	5.78740172517215E-07	1.10657832640089E-07	4.17529220946962E-09	2.28867090522536E-07	6.38854368475734E-08
500190	4157490	421.044006347656	1.62961768832891E-06	4.79919783968492E-08	1.63687781518616E-06	6.20925847990274E-07	1.14959123491254E-07	4.32889750964555E-09	2.3779023351856E-07	6.6369476648655E-08
500390	4157490	427.718994140625	1.79613559777201E-06	5.14337074452852E-08	1.75209684808396E-06	6.64668462259585E-07	1.18651215635492E-07	4.46004831396603E-09	2.45452271914718E-07	6.85019002907328E-08
500590	4157490	417.167999267578	1.97968045081383E-06	5.50935229566011E-08	1.87131952819777E-06	7.09993394852301E-07	1.21652046402121E-07	4.56582526053436E-09	2.51682950385493E-07	7.02353202226859E-08
500790	4157490	438.252990722656	2.18260958100908E-06	5.90010114762524E-08	1.99470752496323E-06	7.56977834908625E-07	1.23892601348338E-07	4.64378208610907E-09	2.56339047431531E-07	7.15298802961038E-08
500990	4157490	449.430999755859	2.4077213108383E-06	6.31945473289348E-08	2.12258850428221E-06	8.05764467828966E-07	1.25319939934134E-07	4.69205368650483E-09	2.5931065189753E-07	7.23550030439381E-08
501190	4157490	446.769989013672	2.65832492873625E-06	6.77226166423489E-08	2.25548782932659E-06	8.56573757155446E-07	1.25899595608208E-07	4.70944069508906E-09	2.60526143888846E-07	7.26907754212081E-08
501390	4157490	436.902008056641	2.93876461375528E-06	7.26531854455939E-08	2.39429728753054E-06	9.09770794474854E-07	1.25617176624948E-07	4.69546519091913E-09	2.59955519123933E-07	7.25288731285935E-08
501590	4157490	424.980010986328	3.25456286398255E-06	7.80763619308933E-08	2.54032184196212E-06	9.65883866331143E-07	1.24479049800032E-07	4.65039539873692E-09	2.57611809074298E-07	7.18729561395502E-08
501790	4157490	430.614990234375	3.61163433597588E-06	8.40909444620395E-08	2.69504059225981E-06	1.02550963559682E-06	1.22512053259182E-07	4.57523463566486E-09	2.53550488728842E-07	7.07385032020895E-08
501990	4157490	420.240997314453	4.01681016512072E-06	9.08132800256748E-08	2.86025050233715E-06	1.08937064965472E-06	1.19762259855825E-07	4.47167598856113E-09	2.47866916015919E-07	6.9152098106641E-08
502190	4157490	398.4580078125	4.47888059459186E-06	9.83952464713793E-08	3.03830075509299E-06	1.15841137463676E-06	1.16292884199845E-07	4.34202695358285E-09	2.40691994626636E-07	6.71502217817504E-08
502390	4157490	396.217987060547	5.00760045177133E-06	1.07006661606108E-07	3.23178236882419E-06	1.23367499698555E-06	1.12181486052211E-07	4.18910876706621E-09	2.32186377601702E-07	6.47776380261734E-08
502590	4157490	397.403991699219	5.61146619654916E-06	1.16796296958627E-07	3.44286909342098E-06	1.31604076265949E-06	1.07516667157775E-07	4.01613649458019E-09	2.22533621298351E-07	6.20854861839299E-08
502790	4157490	396.247985839844	6.30120614853182E-06	1.27951465913015E-07	3.67427476702902E-06	1.4066073954473E-06	1.02394485859469E-07	3.82659223690524E-09	2.11932750442436E-07	5.91292122673289E-08
502990	4157490	398.718994140625	7.08856404409488E-06	1.40676561512995E-07	3.92883038172092E-06	1.50652682908561E-06	9.69148109564668E-08	3.62409370967753E-09	2.00590699597841E-07	5.59664638409381E-08
503190	4157490	403.631011962891	7.98606583635022E-06	1.55188493497895E-07	4.2093512780371E-06	1.61695339200432E-06	9.11778247583864E-08	3.4122685638731E-09	1.88715063405833E-07	5.26550711741297E-08
503390	4157490	395.973999023438	9.00681111296299E-06	1.71712577006609E-07	4.51851026811669E-06	1.73899541900123E-06	8.52808512592441E-08	3.19464057186796E-09	1.76507520411322E-07	4.92512161064609E-08
503590	4157490	396.675994873047	1.01632617154295E-05	1.90458299993631E-07	4.85842834184121E-06	1.87355212743935E-06	7.93156424131404E-08	2.97453225985755E-09	1.64158206551119E-07	4.58078653540473E-08
503790	4157490	390.174987792969	1.14605611572534E-05	2.11506730574804E-07	5.22904382986258E-06	2.02065337639466E-06	7.33662079751548E-08	2.75498701939774E-09	1.51841215564425E-07	4.23735175892405E-08
503990	4157490	389.704010009766	1.29027270457662E-05	2.34921425519905E-07	5.62958872132321E-06	2.18006310293488E-06	6.75072271590167E-08	2.53871206467286E-09	1.39711305667777E-07	3.89912863816095E-08
504190	4157490	389.489013671875	1.44888273897357E-05	2.60676369508777E-07	6.05756716749464E-06	2.35086478610815E-06	6.18030379019826E-08	2.32804210859271E-09	1.27901803751068E-07	3.56983165835787E-08
504390	4157490	381.986999511719	1.62087967719005E-05	2.88587518210124E-07	6.50786081796051E-06	2.53109495853961E-06	5.63071649747131E-08	2.12492268495055E-09	1.16523626298902E-07	3.25255119023437E-08
504590	4157490	365.622985839844	1.80482655633898E-05	3.18385407429312E-07	6.97326152572016E-06	2.71798181341461E-06	5.10623213779886E-08	1.93090935209619E-09	1.05665283077655E-07	2.94975352946152E-08
504790	4157490	359.506988525391	1.99967002148607E-05	3.49839623413874E-07	7.44557239544768E-06	2.90842198652727E-06	4.61008038944832E-08	1.74718171454879E-09	9.53936970771328E-08	2.66330371550013E-08
504990	4157490	361.424987792969	2.20242556941106E-05	3.8239075294638E-07	7.91217228019179E-06	3.09750589579045E-06	4.1445195072235E-08	1.57456889254287E-09	8.57556590519767E-08	2.39450605501441E-08
505190	4157490	360.321990966797	2.40939060146636E-05	4.15345218482805E-07	8.35824191492201E-06	3.27944532880854E-06	3.71092838796199E-08	1.41358271633478E-09	7.67797356602433E-08	2.14415726646147E-08
505390	4157490	365.589996337891	2.61716280260888E-05	4.48048516472756E-07	8.76932152908213E-06	3.44860674373439E-06	3.30991234671113E-08	1.26445535981332E-09	6.84784625076337E-08	1.91260752176059E-08
505590	4157490	360.988006591797	2.82451912079196E-05	4.80215995020823E-07	9.13602618364002E-06	3.60142360808511E-06	2.94141550967802E-08	1.12717957941102E-09	6.08506739871842E-08	1.69982531449922E-08
505790	4157490	368.81298828125	3.00694710607087E-05	5.07945146446476E-07	9.41780269788652E-06	3.72077220484569E-06	2.60483386195113E-08	1.00154926062407E-09	5.38838465979451E-08	1.50546270892182E-08
505990	4157490	359.558013916016	2.72456099379709E-05	4.61744329051837E-07	8.95359086313897E-06	3.5237499082623E-06	2.29912427647776E-08	8.87198557614373E-10	4.75563588843535E-08	1.32891826987727E-08
506190	4157490	350.136993408203	2.45295257931882E-05	4.1690773960788E-07	8.46391981920268E-06	3.31842234932612E-06	2.02290609530042E-08	7.83638397733466E-10	4.18395969173093E-08	1.169395694679E-08
506390	4157490	349.299011230469	2.19061410120102E-05	3.73325598898535E-07	7.95265995254278E-06	3.10611527115509E-06	1.77455297350622E-08	6.9028958161778E-10	3.66998578040062E-08	1.02595682777085E-08
506590	4157490	345.230987548828	1.94607741447978E-05	3.32459075779181E-07	7.43859603250776E-06	2.89453904825192E-06	1.55227365465901E-08	6.06511655170053E-10	3.21000239230209E-08	8.97568272135825E-09
506790	4157490	348.186004638672	1.72264792283732E-05	2.94914803388889E-07	6.93184460665685E-06	2.68773072335986E-06	1.3541811991305E-08	5.31628121602834E-10	2.80009973777875E-08	7.8314135998556E-09
506990	4157490	345.825012207031	1.52092652856219E-05	2.60845938401195E-07	6.43773154611712E-06	2.48770921541502E-06	1.17835074311773E-08	4.64947236454885E-10	2.43628969224376E-08	6.81565487005721E-09
507190	4157490	335.696990966797	1.34027240594805E-05	2.30189052106031E-07	5.95927487242281E-06	2.29552241338564E-06	1.02286637653482E-08	4.05778987449312E-10	2.11460292485702E-08	5.91735170295349E-09
507390	4157490	331.016998291016	1.17940095226674E-05	2.0276467110364E-07	5.49832481603868E-06	2.11172270480236E-06	8.85858018573649E-09	3.53448530307605E-10	1.83116528953546E-08	5.12571335213888E-09
507590	4157490	329.742004394531	1.03672277915249E-05	1.78335614205288E-07	5.05619236891335E-06	1.93663101132429E-06	7.65529355006531E-09	3.07306399559037E-10	1.58225569019221E-08	4.43037442352776E-09
507790	4157490	328.553009033203	9.10547858306718E-06	1.56642541617923E-07	4.63396187233596E-06	1.77047228417901E-06	6.60177981239526E-09	2.66735692649374E-10	1.36434781011837E-08	3.82151104283819E-09
507990	4157490	331.627990722656	7.99205311580158E-06	1.37425002361163E-07	4.23260342857357E-06	1.61342952311037E-06	5.68208946729458E-09	2.31157297809609E-10	1.17413813122688E-08	3.28991915326166E-09
508190	4157490	327.361999511719	7.01109348065155E-06	1.20433146286116E-07	3.85297321449664E-06	1.46565139141433E-06	4.88142791322286E-09	2.00032946541282E-10	1.00856255448495E-08	2.82706092432268E-09
508390	4157490	327.571014404297	6.14791630193685E-06	1.05433611993846E-07	3.49576508823558E-06	1.32723853665767E-06	4.18619121788423E-09	1.72866579103619E-10	8.64803786317582E-09	2.4250853833141E-09
508590	4157490	332.441009521484	5.38913483917986E-06	9.22119317650473E-08	3.16145414121432E-06	1.19822477688712E-06	3.58396674013599E-09	1.49204543523369E-10	7.4029143575867E-09	2.0768288196673E-09
508790	4157490	332.197998046875	4.72266576760314E-06	8.0572950583895E-08	2.85025432531071E-06	1.07856209169812E-06	3.06350673826082E-09	1.28634755855993E-10	6.3269652054169E-09	1.77579956878621E-09
508990	4157490	332.855987548828	4.13767419188354E-06	7.0340191208237E-08	2.56209892349869E-06	9.68113177016661E-07	2.61468208692645E-09	1.10785157286049E-10	5.39921852051335E-09	1.51615132798477E-09
509190	4157490	329.859008789062	3.62448888518939E-06	6.13547147186074E-08	2.29664415535328E-06	8.66652020379796E-07	2.22842202660547E-09	9.53216569763249E-11	4.60089529176091E-09	1.29264841196033E-09
509390	4157490	326.626007080078	3.17450603612253E-06	5.34737830030373E-08	2.05329168724267E-06	7.73871167267091E-07	1.89664478943429E-09	8.19456661488599E-11	3.91526551650378E-09	1.10062571078456E-09
509590	4157490	329.2080078125	2.7800914148789E-06	4.65694922348604E-08	1.83122411100208E-06	6.89393645797155E-07	1.61218313445348E-09	7.03915311182508E-11	3.32749372068877E-09	9.35945753339149E-10
509790	4157490	326.036010742188	2.43448596417687E-06	4.05274540122644E-08	1.62944748811845E-06	6.12787469936418E-07	1.36870783801431E-09	6.04238966317942E-11	2.8244802542503E-09	7.94954596884175E-10
509990	4157490	326.898010253906	2.13171708898735E-06	3.52455535850627E-08	1.4468359989178E-06	5.43580951013681E-07	1.16065147255453E-09	5.18349905186035E-11	2.39470329269013E-09	6.74437846475365E-10
510190	4157490	328.063995361328	1.86651648439321E-06	3.06327976767854E-08	1.28217500899366E-06	4.81277495515157E-07	9.8313429472543E-10	4.44420021463165E-11	2.0280652056449E-09	5.71577903760064E-10
510390	4157490	313.316986083984	1.63424464031289E-06	2.6608252139257E-08	1.13420013863079E-06	4.25369018569845E-07	8.31893484058589E-10	3.80845741970543E-11	1.71574588743125E-09	4.83913149065942E-10
510590	4157490	288.817993164062	1.43082184423011E-06	2.31000635261615E-08	1.00163097866676E-06	3.75347480054756E-07	7.03216587076263E-10	3.26224451208039E-11	1.45006481325453E-09	4.09299552901314E-10
510790	4157490	276.061004638672	1.25266538499019E-06	2.00445582663235E-08	8.83198928711382E-07	3.3071435022876E-07	5.93879659360291E-10	2.79332208110953E-11	1.22435288009641E-09	3.45874982522057E-10
510990	4157490	255.764999389648	1.09663262141626E-06	1.73854154926402E-08	7.77669199246963E-07	2.90988017318389E-07	5.01090412423181E-10	2.39103656370338E-11	1.03283458409381E-09	2.92026416419548E-10
511190	4157490	242.261001586914	9.59969575590255E-07	1.5072907546926E-08	6.83857401777204E-07	2.5570928618667E-07	4.22436387073399E-10	2.04613446233027E-11	8.70520649547132E-10	2.4636004721529E-10
511390	4157490	236.604995727539	8.4026470908841E-07	1.30632048486536E-08	6.00641348153874E-07	2.24445189970017E-07	3.55838088158235E-10	1.75059444244036E-11	7.33110944716935E-10	2.07674249469134E-10
511590	4157490	222.167999267578	7.35407538690332E-07	1.1317740397899E-08	5.26968768461665E-07	1.96791367499353E-07	2.99506879810405E-10	1.49747419469368E-11	6.16907279448079E-10	1.74935281906637E-10
511790	4157490	240.899993896484	6.43551746045269E-07	9.80263234028672E-09	4.61861666217275E-07	1.72373264735547E-07	2.5190739966665E-10	1.2807754501938E-11	5.18735554470872E-10	1.4725560807811E-10
511990	4157490	220.850997924805	5.63082429581905E-07	8.48815933255758E-09	4.04417979651825E-07	1.50846398068291E-07	2.11724183349488E-10	1.09532328885383E-11	4.35876646033452E-10	1.23874643307487E-10
512190	4157490	206.22200012207	4.92587150854089E-07	7.34828679736652E-09	3.53811162452302E-07	1.31895899502502E-07	1.77832170151822E-10	9.3665976067122E-12	3.66005330824689E-10	1.04141743379701E-10
512390	4157490	189.714996337891	4.30830428181846E-07	6.36024012182221E-09	3.09288208258663E-07	1.15235530333333E-07	1.49270740115602E-10	8.00948792969591E-12	3.07136534578916E-10	8.75012223006456E-11
512590	4157490	164.024993896484	3.76731338507655E-07	5.50412133699997E-09	2.70166552328184E-07	1.00606317446209E-07	1.25220961930204E-10	6.84893139415674E-12	2.57578231453174E-10	7.34792258668397E-11
512790	4157490	161.42399597168	3.29343897425657E-07	4.76256552269714E-09	2.3583021082626E-07	8.77749398824059E-08	1.04985724152227E-10	5.85661829035261E-12	2.1589031720326E-10	6.16722698223383E-11
512990	4157490	149.375	2.87839918159775E-07	4.12043386128385E-09	2.05725450333235E-07	7.65319692690838E-08	8.79724312250203E-11	5.00825535423856E-12	1.80848799014512E-10	5.17372490237103E-11
513190	4157490	110.519996643066	2.51494058548132E-07	3.56454078565698E-09	1.79356213156554E-07	6.66900438816587E-08	7.36779869823305E-11	4.28301028670764E-12	1.51414714129226E-10	4.33827699393243E-11
513390	4157490	94.2330017089844	2.19670797675822E-07	3.08341361675864E-09	1.56279479185649E-07	5.80820405368373E-08	6.16758112210424E-11	3.66303944958159E-12	1.26707265972561E-10	3.63616649926392E-11
513590	4157490	89.4000015258789	1.91813092607131E-07	2.66707796107522E-09	1.36100675134024E-07	5.05592800228473E-08	5.16046232250507E-11	3.13306835194713E-12	1.05980619142814E-10	3.04645179769982E-11
513790	4157490	93.5619964599609	1.67432507755923E-07	2.30686818735713E-09	1.18469235256658E-07	4.39898032057834E-08	4.31587800660921E-11	2.68002360801543E-12	8.86039152201022E-11	2.55140831689036E-11
513990	4157490	55.7649993896484	1.46100624543575E-07	1.99526078303051E-09	1.03074375517945E-07	3.82567387860903E-08	3.60799759453873E-11	2.29272038050949E-12	7.40441025223767E-11	2.13604929688661E-11
514190	4157490	23.7169990539551	1.27441562392113E-07	1.72572809313399E-09	8.96411221485774E-08	3.32567758969224E-08	3.01501261064758E-11	1.96159660018703E-12	6.18512174889171E-11	1.78771513902717E-11
514390	4157490	0	1.11125463363818E-07	1.49260963043471E-09	7.7926617481301E-08	2.8898748020958E-08	2.51852775655789E-11	1.67847922671725E-12	5.16457988341294E-11	1.49572178396044E-11
514590	4157490	0	9.68628111179711E-08	1.2909992450275E-09	6.77167124538768E-08	2.51023305324339E-08	2.10304026833825E-11	1.43638310816741E-12	4.31081219126446E-11	1.25105985395729E-11
514790	4157490	0	8.43994731605876E-08	1.11664663691211E-09	5.88228468995613E-08	2.17968513098454E-08	1.7554960818426E-11	1.22934152225458E-12	3.5969022144229E-11	1.0461383496532E-11
482590	4157690	210.358001708984	9.71065082992346E-11	2.07682830943227E-11	4.70275367776236E-11	3.02583735250927E-11	3.30672915845562E-13	1.09540168814248E-13	5.22174026800847E-13	2.19235071316327E-13
482790	4157690	217.533004760742	1.09579802008098E-10	2.32452437839227E-11	5.38918405693429E-11	3.43199327424384E-11	3.91355665824221E-13	1.25951936033967E-13	6.25077394843954E-13	2.58637239723543E-13
482990	4157690	232.886001586914	1.23618534133115E-10	2.60058514637831E-11	6.17427936844548E-11	3.89189325017578E-11	4.63310130725262E-13	1.44769402022812E-13	7.48178678828473E-13	3.05174084714206E-13
483190	4157690	235.52799987793	1.39412040555322E-10	2.90807434505318E-11	7.0719886709268E-11	4.41252942442506E-11	5.48649454551942E-13	1.66337647695584E-13	8.95423414219531E-13	3.60147592345392E-13
483390	4157690	234.738006591797	1.57171360131753E-10	3.25036074878723E-11	8.09820056783651E-11	5.00178870193086E-11	6.49885174547706E-13	1.91050636523432E-13	1.07152341492737E-12	4.25099288044344E-13
483590	4157690	239.621994018555	1.77131543433095E-10	3.63114262013576E-11	9.27100797148047E-11	5.66856387827948E-11	7.70002326633553E-13	2.19357860648493E-13	1.28210446747693E-12	5.01854366793801E-13
483790	4157690	276.438995361328	1.99554199486124E-10	4.05447604558437E-11	1.06110089165845E-10	6.42288026029057E-11	9.1254873428456E-13	2.51772106794744E-13	1.53388226078312E-12	5.92574149182786E-13
483990	4157690	316.755004882812	2.24730291210728E-10	4.52480634957231E-11	1.21416487631727E-10	7.2760391830537E-11	1.08174115275628E-12	2.88878647666641E-13	1.83487190930808E-12	6.99818511665575E-13
484190	4157690	322.9580078125	2.52983174983815E-10	5.0469905060176E-11	1.38896069739164E-10	8.24077183539371E-11	1.28259084424629E-12	3.31344416225034E-13	2.19463706257772E-12	8.26618823701811E-13
484390	4157690	324.528991699219	2.84671987943653E-10	5.62633444359105E-11	1.5885237588527E-10	9.33142198608274E-11	1.5210532343455E-12	3.79930003978984E-13	2.62458659301423E-12	9.76565602836113E-13
484590	4157690	329.72900390625	3.20195345495274E-10	6.26862729661119E-11	1.81630685600713E-10	1.05641479797678E-10	1.80420535598632E-12	4.35502999137016E-13	3.13832737723934E-12	1.1539120601299E-12
484790	4157690	305.029998779297	3.59995417172207E-10	6.98017667506538E-11	2.07623679570768E-10	1.19571494972148E-10	2.14045621378842E-12	4.99052819718402E-13	3.75208362076639E-12	1.36369642679368E-12
484990	4157690	275.402008056641	4.04562417736255E-10	7.76784696995938E-11	2.37277865220325E-10	1.35309237932818E-10	2.539796346202E-12	5.71707851662449E-13	4.48519520684026E-12	1.61188697370464E-12
485190	4157690	260.959014892578	4.54439550283782E-10	8.63909866826856E-11	2.7110086622273E-10	1.5308553734124E-10	3.01409386991688E-12	6.54755261494545E-13	5.36070966511605E-12	1.90555387388207E-12
485390	4157690	258.816986083984	5.1022846284236E-10	9.60202947542778E-11	3.09669692013619E-10	1.73160323309669E-10	3.57744521941866E-12	7.49663559692088E-13	6.40608501718963E-12	2.25307254969687E-12
485590	4157690	238.481002807617	5.72595245966775E-10	1.06654109047399E-10	3.53640117675996E-10	1.95826244106152E-10	4.2465899351182E-12	8.58107511545511E-13	7.65402384494907E-12	2.66436361519775E-12
485790	4157690	229.824005126953	6.42277109388836E-10	1.18387314894362E-10	4.037573249848E-10	2.21412780036911E-10	5.0414024530646E-12	9.81997481989796E-13	9.14346262762271E-12	3.15117733624254E-12
485990	4157690	195.365997314453	7.20089791291285E-10	1.3132241030056E-10	4.60867972530075E-10	2.50290879278038E-10	5.98547409873885E-12	1.12351300283943E-12	1.09207445953532E-11	3.72742995944965E-12
486190	4157690	149.328994750977	8.06935838287996E-10	1.45570020337892E-10	5.25933888588867E-10	2.82878224912681E-10	7.10680226852049E-12	1.28514219615296E-12	1.30410094183026E-11	4.40960196419728E-12
486390	4157690	72.3949966430664	9.03813830062121E-10	1.61249414608471E-10	6.00047634392538E-10	3.19645178394581E-10	8.43860517986704E-12	1.46972703464635E-12	1.55698397703855E-11	5.21720886351796E-12
486590	4157690	79.3769989013672	1.01182860704979E-09	1.78488879770713E-10	6.84450065883809E-10	3.6112135083713E-10	1.00202821245857E-11	1.68051202930314E-12	1.85852071772865E-11	6.17335405313591E-12
486790	4157690	79.1220016479492	1.13220274613874E-09	1.97426106255579E-10	7.8055025502841E-10	4.07903034233015E-10	1.18985472963362E-11	1.92120006418298E-12	2.21797731228909E-11	7.30538131594321E-12
486990	4157690	77.8470001220703	1.26628964153743E-09	2.18208874016403E-10	8.89948209880368E-10	4.6066183337646E-10	1.41287722387542E-11	2.19602244226463E-12	2.64636124720295E-11	8.64564999102554E-12
487190	4157690	77.4540023803711	1.41558815065191E-09	2.40995562459242E-10	1.0144605351904E-09	5.20154245523573E-10	1.67765658104529E-11	2.5098152108166E-12	3.15674264187236E-11	1.02324448400217E-11
487390	4157690	77.5630035400391	1.58175911345399E-09	2.65955668473203E-10	1.15614944607021E-09	5.87232454327786E-10	1.9919635492455E-11	2.86810656744298E-12	3.76463331606612E-11	1.21110475762315E-11
487590	4157690	79.6380004882812	1.76664411456019E-09	2.93270377929796E-10	1.31735566520841E-09	6.6285655838774E-10	2.36499792367081E-11	3.27721791869489E-12	4.48843369948913E-11	1.43349987040327E-11
487790	4157690	82.7789993286133	1.97228696461156E-09	3.23133171305646E-10	1.50073596854988E-09	7.48108497850408E-10	2.80764637173064E-11	3.74438001631915E-12	5.34995919065283E-11	1.69675815599063E-11
487990	4157690	89.6460037231445	2.20095811826646E-09	3.5575083996492E-10	1.7093054115637E-09	8.44207931747104E-10	3.33278573312437E-11	4.27787468190963E-12	6.37505959250055E-11	2.00835724898975E-11
488190	4157690	101.347999572754	2.45518228494925E-09	3.9134346807674E-10	1.94648513160076E-09	9.52529463635491E-10	3.955638171595E-11	4.88717328503589E-12	7.5943468679976E-11	2.3771276485974E-11
488390	4157690	117.259002685547	2.7377702688419E-09	4.30145221802686E-10	2.21615652310857E-09	1.0746226821742E-09	4.69418835657303E-11	5.58311264252383E-12	9.04404984493616E-11	2.81349276629207E-11
488590	4157690	123.199996948242	3.05185563474248E-09	4.72405772975504E-10	2.52272262433578E-09	1.21223520838762E-09	5.56967260990564E-11	6.37811104967182E-12	1.07670166636312E-10	3.32975118233623E-11
488790	4157690	126.620002746582	3.40093645591466E-09	5.18390951050726E-10	2.87117738311744E-09	1.36733808983606E-09	6.60715041090528E-11	7.28639492261817E-12	1.28138885814824E-10	3.94040521735425E-11
488990	4157690	129.367004394531	3.78892413739346E-09	5.68383819393663E-10	3.26718674746588E-09	1.54215573052885E-09	7.83617240044093E-11	8.32426619562465E-12	1.52444729330839E-10	4.66254542063153E-11
489190	4157690	133.447998046875	4.22019969546126E-09	6.22685927773337E-10	3.71718047288942E-09	1.73919979801156E-09	9.29155978031689E-11	9.51040939610452E-12	1.81293465870618E-10	5.51629922444564E-11
489390	4157690	132.169998168945	4.69967372326238E-09	6.81618589086075E-10	4.22844226977655E-09	1.96130254675313E-09	1.10143122688554E-10	1.08662442879161E-11	2.15517255868585E-10	6.525353680528E-11
489590	4157690	135.86799621582	5.23286041348673E-09	7.45524742110298E-10	4.80922653423666E-09	2.21166010312648E-09	1.30526644726319E-10	1.24163353885945E-11	2.56096414074775E-10	7.71756385344658E-11
489790	4157690	139.753005981445	5.82596078872028E-09	8.14770395793169E-10	5.46888560194037E-09	2.49387927665089E-09	1.5463310719907E-10	1.41888445532037E-11	3.04184695458607E-10	9.1256580053148E-11
489990	4157690	147.119003295898	6.48595809285417E-09	8.89746594344158E-10	6.21801251592053E-09	2.81203029880166E-09	1.83128246980838E-10	1.62160552552485E-11	3.61138614743368E-10	1.07880552355161E-10
490190	4157690	164.886001586914	7.22072708584082E-09	9.70872200034868E-10	7.06860106877954E-09	3.17070631428223E-09	2.16793019447025E-10	1.85349837011406E-11	4.285513715728E-10	1.27498118875507E-10
490390	4157690	191.554992675781	8.03915896746176E-09	1.05859699770304E-09	8.03422542240965E-09	3.57509013759617E-09	2.56542540467768E-10	2.11880735754857E-11	5.08292009358433E-10	1.50637131771572E-10
490590	4157690	249.47900390625	8.95130361386951E-09	1.15340483367391E-09	9.13024123200271E-09	4.03102878567814E-09	3.03447868913987E-10	2.42239758390339E-11	6.02550500258876E-10	1.77915285470162E-10
490790	4157690	229.434997558594	9.96853200878906E-09	1.25581829881532E-09	1.037401052625E-08	4.54511756530764E-09	3.58761012480454E-10	2.76984634114582E-11	7.13889510453484E-10	2.10054544497612E-10
490990	4157690	216.97200012207	1.11037151544714E-08	1.36640133988816E-09	1.17851377415689E-08	5.12478685490628E-09	4.23943501320767E-10	3.16753960759631E-11	8.45303640095786E-10	2.47897594490293E-10
491190	4157690	219.04899597168	1.2371426501925E-08	1.48576507973258E-09	1.33857281712258E-08	5.77839902304362E-09	5.00698992250283E-10	3.62278858348359E-11	1.00028700777447E-09	2.92426657897018E-10
491390	4157690	228.128005981445	1.37881959689549E-08	1.61457492099157E-09	1.52007481550773E-08	6.51538285833622E-09	5.91010294447499E-10	4.14396010650049E-11	1.18291005374157E-09	3.44784861401651E-10
491590	4157690	234.876007080078	1.53727683059064E-08	1.75355595405391E-09	1.72583431163587E-08	7.34635170934738E-09	6.97181242722087E-10	4.74062072754926E-11	1.39790645988091E-09	4.06300392074597E-10
491790	4157690	238.203002929688	1.71464021428926E-08	1.90349899250027E-09	1.95902118256553E-08	8.28324230146679E-09	8.21883806725979E-10	5.42369143862648E-11	1.65077104713721E-09	4.7851364887694E-10
491990	4157690	239.962997436523	1.9133208040174E-08	2.06527188306135E-09	2.22320199188054E-08	9.33947108509984E-09	9.68210948147558E-10	6.20563642521778E-11	1.94786952276455E-09	5.63207793042781E-10
492190	4157690	243.940002441406	2.13605252575466E-08	2.23982832100691E-09	2.5223852366522E-08	1.05301030308142E-08	1.13973542039282E-09	7.10066070842854E-11	2.29656073873333E-09	6.62442688423694E-10
492390	4157690	251.313003540039	2.38593423816582E-08	2.42821792827519E-09	2.86107070198348E-08	1.18720360431902E-08	1.34057481657195E-09	8.12492755282643E-11	2.70533200884083E-09	7.78592457199416E-10
492590	4157690	256.290008544922	2.66647661058185E-08	2.63159873954094E-09	3.24430303905365E-08	1.33842021444037E-08	1.57546302015961E-09	9.29679984273939E-11	3.18394775003507E-09	9.14386752386176E-10
492790	4157690	278.873992919922	2.98165401622929E-08	2.85124874963322E-09	3.67772959967144E-08	1.50877834031436E-08	1.84982793797646E-09	1.06370951778843E-10	3.74361132546531E-09	1.07295563929661E-09
492990	4157690	307.282012939453	3.33596197336341E-08	3.08858249268936E-09	4.16766251275825E-08	1.70064463791098E-08	2.1698752826467E-09	1.21693714077173E-10	4.39713947260379E-09	1.2578780449164E-09
493190	4157690	317.264007568359	3.73448032352977E-08	3.34516431966594E-09	4.72114479753319E-08	1.9166589006057E-08	2.54267773117427E-09	1.39202132032803E-10	5.15914798432033E-09	1.47323320520532E-09
493390	4157690	320.992004394531	4.18294238007556E-08	3.62272294948216E-09	5.34602021199123E-08	2.1597601756064E-08	2.97626834187881E-09	1.59195293219968E-10	6.04624646363849E-09	1.72365460215389E-09
493590	4157690	325.388000488281	4.68781010079736E-08	3.92317272120161E-09	6.05100637667573E-08	2.43321449004988E-08	3.47973652718574E-09	1.82008737626449E-10	7.07723888367849E-09	2.01438561898853E-09
493790	4157690	326.196014404297	5.25635634198488E-08	4.24863519534449E-09	6.84577037532253E-08	2.74064349208514E-08	4.06332482127635E-09	2.08017624119046E-10	8.27332525974764E-09	2.35133545779482E-09
493990	4157690	328.688995361328	5.89675288548775E-08	4.60145424884642E-09	7.74100581312898E-08	3.08605320028425E-08	4.73852303519597E-09	2.37639668783318E-10	9.65829811449763E-09	2.74113350587962E-09
494190	4157690	331.968994140625	6.61816502906122E-08	4.98422088179582E-09	8.74851005641738E-08	3.4738634396286E-08	5.5181557857022E-09	2.71338032287781E-10	1.12587254741461E-08	3.19118008551596E-09
494390	4157690	334.605010986328	7.43085198085294E-08	5.39978846126827E-09	9.88125954602245E-08	3.90893596962887E-08	6.41645810227308E-09	3.09623354575267E-10	1.31041095786016E-08	3.70969012359177E-09
494590	4157690	326.535003662109	8.34627347635639E-08	5.85129844515413E-09	1.11534815478514E-07	4.39660199781394E-08	7.44913329644409E-09	3.53055509984555E-10	1.52270083872117E-08	4.3057267293656E-09
494790	4157690	328.606994628906	9.37720070101879E-08	6.34220219769245E-09	1.2580719101311E-07	4.94268698894817E-08	8.63338487679998E-09	4.02244406921753E-10	1.76631033954681E-08	4.98921980322826E-09
494990	4157690	332.412994384766	1.05378321686364E-07	6.87627984238588E-09	1.41798870691229E-07	5.55353207441558E-08	9.98791315067757E-09	4.57849390803291E-10	2.04511944045548E-08	5.77096420814983E-09
495190	4157690	334.290008544922	1.18439098007416E-07	7.4576587419087E-09	1.59693122704333E-07	6.23600969660578E-08	1.15328657657499E-08	5.20577145571689E-10	2.36330985641511E-08	6.66259140013578E-09
495390	4157690	346.346984863281	1.33128349423122E-07	8.09082382140552E-09	1.79687541053316E-07	6.9975316944652E-08	1.32897296494864E-08	5.91177382921823E-10	2.72534276237311E-08	7.67650706912652E-09
495590	4157690	335.427001953125	1.49637822575429E-07	8.78062542904247E-09	2.01994007991118E-07	7.8460484379222E-08	1.52811501606335E-08	6.70436020315013E-10	3.13592144148566E-08	8.82578687039581E-09
495790	4157690	320.796997070312	1.68178148107998E-07	9.53229334612433E-09	2.26838390882836E-07	8.79003877723567E-08	1.75306626454519E-08	7.59165505067789E-10	3.59993571555798E-08	1.01240216482303E-08
495990	4157690	343.098999023438	1.88979876866232E-07	1.03514280188701E-08	2.54459832565341E-07	9.83848387283497E-08	2.00623203786021E-08	8.58191268447561E-10	4.12238487545149E-08	1.15851026833481E-08
496190	4157690	338.651000976562	2.12294405723232E-07	1.12439872720329E-08	2.85109583530059E-07	1.10008242113965E-07	2.29002033530536E-08	9.683340954854E-10	4.70827585826002E-08	1.32229381617407E-08
496390	4157690	338.06298828125	2.3839477710182E-07	1.22162676316969E-08	3.19049307116419E-07	1.22868972707378E-07	2.6067793369887E-08	1.09038782927021E-09	5.36249365368037E-08	1.50510924191733E-08
496590	4157690	338.846984863281	2.67576303789899E-07	1.32748751310055E-08	3.56548771159556E-07	1.37068523838598E-07	2.95872038199404E-08	1.22509238680247E-09	6.08964146768829E-08	1.70823413758299E-08
496790	4157690	342.4169921875	3.00156987785431E-07	1.44266729123935E-08	3.97882844175145E-07	1.52710390356967E-07	3.34782557390712E-08	1.37310096939124E-09	6.89384902070061E-08	1.93281390280703E-08
496990	4157690	337.885009765625	3.36477715080191E-07	1.5678698427742E-08	4.43327725681927E-07	1.69898655929834E-07	3.7757398491212E-08	1.53494096596647E-09	7.77854870495208E-08	2.17979938972761E-08
497190	4157690	344.753997802734	3.76902247936754E-07	1.70380804831546E-08	4.93156367878191E-07	1.88736288615126E-07	4.24364843548089E-08	1.71097068844456E-09	8.74622124366998E-08	2.44987613722587E-08
497390	4157690	358.164001464844	4.21817054294895E-07	1.85119640700295E-08	5.47633069652317E-07	2.09323142938006E-07	4.75214164587685E-08	1.90133312311218E-09	9.79811480907107E-08	2.74338633302473E-08
497590	4157690	364.744995117188	4.71631099577204E-07	2.0107396382667E-08	6.07007288304648E-07	2.31753655000218E-07	5.30107000055028E-08	2.10590455024018E-09	1.09339443067718E-07	3.06024512829594E-08
497790	4157690	364.497009277344	5.26775488327369E-07	2.18311843061637E-08	6.71506654315891E-07	2.56114231924455E-07	5.88939479291272E-08	2.32424205535626E-09	1.215158109715E-07	3.39985432960472E-08
497990	4157690	362.867004394531	5.87703354193681E-07	2.36897537184058E-08	7.41329414533632E-07	2.82480436348986E-07	6.51504075108235E-08	2.55553200857293E-09	1.34467470003015E-07	3.76101730027519E-08
498190	4157690	361.704010009766	6.54890413559054E-07	2.56890163904669E-08	8.16636622424081E-07	3.10914084600506E-07	7.1747592696789E-08	2.79854240911872E-09	1.48127301858854E-07	4.14185996129942E-08
498390	4157690	368.375	7.28836747338696E-07	2.78342769498941E-08	8.9754450607417E-07	3.41460434664449E-07	7.8640123720186E-08	3.05158269446586E-09	1.6240144030866E-07	4.53976375871827E-08
498590	4157690	376.322998046875	8.10069913738035E-07	3.01301457395558E-08	9.84117359185419E-07	3.74145566590072E-07	8.57688890282697E-08	3.31247538132672E-09	1.77167527890229E-07	4.95131725447312E-08
498790	4157690	369.101989746094	8.99150553896957E-07	3.25805025042785E-08	1.07636181283335E-06	4.08974293460044E-07	9.30606513477019E-08	3.57854297359823E-09	1.92273894146559E-07	5.3722933274612E-08
498990	4157690	382.441009521484	9.96681365349366E-07	3.51885401472878E-08	1.17422332410678E-06	4.45928923196587E-07	1.00428218697723E-07	3.84661479971802E-09	2.07539905851088E-07	5.79765898256263E-08
499190	4157690	398.151000976562	1.10332056899458E-06	3.79569455308358E-08	1.2775859005676E-06	4.84969275170002E-07	1.07771288574043E-07	4.11305865404483E-09	2.22757713130012E-07	6.22162407580269E-08
499390	4157690	403.790985107422	1.21980111544838E-06	4.08882324840525E-08	1.38627618367384E-06	5.26034366381906E-07	1.14978046738275E-07	4.37383919959119E-09	2.37695561106911E-07	6.63773360698402E-08
499590	4157690	408.996002197266	1.34695692491278E-06	4.39852540063609E-08	1.50007303746765E-06	5.69046197918221E-07	1.21927561999824E-07	4.62460418304369E-09	2.52102753360477E-07	7.03900595004381E-08
499790	4157690	418.765014648438	1.48575738280759E-06	4.72519440459189E-08	1.61872368999683E-06	6.13916051706634E-07	1.28492965474989E-07	4.86079866158732E-09	2.65716242896117E-07	7.4181163900798E-08
499990	4157690	419.513000488281	1.6373510491191E-06	5.06943135884719E-08	1.74196720317789E-06	6.60553593182144E-07	1.34545338697718E-07	5.07780443006157E-09	2.78268694007825E-07	7.76762159845831E-08
500190	4157690	423.881011962891	1.80311904764437E-06	5.43216882507927E-08	1.86956556808514E-06	7.0887887877893E-07	1.39958165050606E-07	5.27109820199832E-09	2.8949771486361E-07	8.08021659592601E-08
500390	4157690	431.888000488281	1.98473793627751E-06	5.81482339594632E-08	2.00134207087048E-06	7.58837170138663E-07	1.44612135790513E-07	5.43642389111453E-09	2.99155824230151E-07	8.34901226028166E-08
500590	4157690	437.721984863281	2.18425488849795E-06	6.21946922643684E-08	2.1372256662688E-06	8.10416049308399E-07	1.484000406247E-07	5.56996728958344E-09	3.0702059499887E-07	8.56781770836211E-08
500790	4157690	445.415985107422	2.4041648514236E-06	6.64902510696977E-08	2.27729912221766E-06	8.63663980855698E-07	1.51231436493455E-07	5.66852202010543E-09	3.12904339423918E-07	8.73140985862754E-08
500990	4157690	455.135986328125	2.64746889444978E-06	7.10744801206044E-08	2.42184772660518E-06	9.18709118375784E-07	1.53036777958336E-07	5.72963717069451E-09	3.16662676937995E-07	8.83577195422223E-08
501190	4157690	453.652008056641	2.9177754493917E-06	7.59991412259089E-08	2.57140449636361E-06	9.75776769598913E-07	1.53770707071326E-07	5.75173265432783E-09	3.18201362642268E-07	8.87828349491725E-08
501390	4157690	444.398986816406	3.21936334348365E-06	8.1329781076812E-08	2.72678729769403E-06	1.03520380532339E-06	1.53414255478131E-07	5.73417674869918E-09	3.17480858540462E-07	8.85784740737095E-08
501590	4157690	441.988006591797	3.55726066942561E-06	8.71474001146825E-08	2.88913105719211E-06	1.09745134681951E-06	1.51975786197346E-07	5.67731974231791E-09	3.14518290019667E-07	8.77494450753364E-08
501790	4157690	435.040008544922	3.93843499489511E-06	9.35689521413689E-08	3.0602411080404E-06	1.16324532515823E-06	1.49490598772776E-07	5.58247883532852E-09	3.09386631460826E-07	8.63161075018283E-08
501990	4157690	430.143005371094	4.37087235466683E-06	1.00731384934226E-07	3.2423035301195E-06	1.23346180171726E-06	1.46019228702705E-07	5.45187593263307E-09	3.02211184517459E-07	8.43133907434226E-08
502190	4157690	414.471984863281	4.86329090786032E-06	1.08786388288245E-07	3.4377727939239E-06	1.30908308774903E-06	1.41644575221225E-07	5.28853430975328E-09	2.93163625806034E-07	8.17891363798779E-08
502390	4157690	416.884002685547	5.4256228280553E-06	1.1790812382287E-07	3.64947728761705E-06	1.39124075377148E-06	1.36468077081329E-07	5.09614084814321E-09	2.82454080484361E-07	7.88018906419629E-08
502590	4157690	413.016998291016	6.0706143838105E-06	1.28320523507468E-07	3.8809611514625E-06	1.48135639123583E-06	1.30605218645051E-07	4.87888340943407E-09	2.70321807522062E-07	7.54183096863956E-08
502790	4157690	414.584991455078	6.81123301830161E-06	1.40251908626645E-07	4.13567093635838E-06	1.58081923326836E-06	1.24180683431493E-07	4.64127926879162E-09	2.57025149619454E-07	7.17103628935784E-08
502990	4157690	414.792999267578	7.65933288400971E-06	1.5391069664744E-07	4.41657070193445E-06	1.69083179033833E-06	1.17323466001754E-07	4.3879988471213E-09	2.42831400143965E-07	6.77525106602093E-08
503190	4157690	413.358001708984	8.62949447919251E-06	1.69550857785807E-07	4.72715224488522E-06	1.81281609393299E-06	1.10162232157115E-07	4.12369912082614E-09	2.28007183621071E-07	6.36190257710649E-08
503390	4157690	412.880004882812	9.73713433423039E-06	1.87438755198559E-07	5.07078201987278E-06	1.94815693888991E-06	1.02821164521448E-07	3.85287459984173E-09	2.12809842186134E-07	5.93815949965922E-08
503590	4157690	408.809997558594	1.09982445985557E-05	2.07847044556834E-07	5.45051452390282E-06	2.09813067711638E-06	9.541646712077E-08	3.57973194052058E-09	1.97480188228465E-07	5.51073010992887E-08
503790	4157690	402.385009765625	1.24290851164251E-05	2.31046529048035E-07	5.86886780231045E-06	2.26381904104146E-06	8.80536335172801E-08	3.30809191129816E-09	1.82236840088498E-07	5.085704560782E-08
503990	4157690	399.454986572266	1.4043279798135E-05	2.57265353135812E-07	6.32714317522299E-06	2.44583768019488E-06	8.08255162883542E-08	3.04132006123021E-09	1.67272219199905E-07	4.66844341821991E-08
504190	4157690	396.950988769531	1.58403634780365E-05	2.86480830125223E-07	6.82243948866516E-06	2.64312608147067E-06	7.38111773685957E-08	2.78228551243399E-09	1.5275016601489E-07	4.26351128079526E-08
504390	4157690	386.345001220703	1.78163597858716E-05	3.18605171584685E-07	7.35016472256509E-06	2.85397228062285E-06	6.70754524432144E-08	2.53334537351734E-09	1.38805036346296E-07	3.87465162116874E-08
504590	4157690	375.493988037109	1.99563043954813E-05	3.53358084580618E-07	7.90232243858053E-06	3.07531330426578E-06	6.0669129622061E-08	2.2963500269143E-09	1.2554207289544E-07	3.50479704734565E-08
504790	4157690	380.321014404297	2.22257787496725E-05	3.90122955099971E-07	8.46581143577157E-06	3.30202986340625E-06	5.46296268863528E-08	2.07266746598755E-09	1.13038809269404E-07	3.15610840029041E-08
504990	4157690	378.566009521484	2.45618407438464E-05	4.27795565068474E-07	9.02086321788042E-06	3.52628596490604E-06	4.89820446049789E-08	1.86322164269259E-09	1.01347250744081E-07	2.83003552170115E-08
505190	4157690	374.247985839844	2.69189655715119E-05	4.65505478289288E-07	9.54805755420469E-06	3.74052092834726E-06	4.37404725561908E-08	1.66853903734325E-09	9.04965840503643E-08	2.52739268382964E-08
505390	4157690	374.507995605469	2.9235400428616E-05	5.02095000909261E-07	1.00242872222394E-05	3.93566046043402E-06	3.89094439365904E-08	1.48880059953233E-09	8.04961917008578E-08	2.24844250660821E-08
505590	4157690	372.821990966797	3.14610014361323E-05	5.36607581731157E-07	1.04299494204632E-05	4.10402289343156E-06	3.44854436873533E-08	1.32389576446755E-09	7.13387786937889E-08	1.99298301350597E-08
505790	4157690	372.080993652344	3.13060757636145E-05	5.32789275754033E-07	1.0414738332114E-05	4.09605952850865E-06	3.0458396205341E-08	1.17347581273409E-09	6.30034563571713E-08	1.76043350021537E-08
505990	4157690	360.424011230469	2.84320167154948E-05	4.85378791714829E-07	9.93063453124281E-06	3.89108397249429E-06	2.68130756328651E-08	1.03700449936515E-09	5.54586655955038E-08	1.54991593508752E-08
506190	4157690	355.451995849609	2.56153668767499E-05	4.38456858933215E-07	9.40419701186498E-06	3.67115733607172E-06	2.35303989506297E-08	9.13804568260981E-10	4.86648570591244E-08	1.36032959786316E-08
506390	4157690	348.260986328125	2.29305178458463E-05	3.93393638167927E-07	8.85617869156815E-06	3.44464158493496E-06	2.05885770543285E-08	8.03099076007285E-10	4.25768769271648E-08	1.19041751419108E-08
506590	4157690	341.286010742188	2.04299496854606E-05	3.51172514065671E-07	8.3023931751127E-06	3.21786967073743E-06	1.79641117020133E-08	7.04047284643095E-10	3.71460330565283E-08	1.03882399735325E-08
506790	4157690	349.963012695312	1.81249910511772E-05	3.12071293738947E-07	7.75052310049726E-06	2.9937903476106E-06	1.56326361504888E-08	6.15775136613401E-10	3.23218369180888E-08	9.04143176493746E-09
506990	4157690	349.528015136719	1.60216427023619E-05	2.76244756850793E-07	7.2062636467726E-06	2.77455678991118E-06	1.35696045702392E-08	5.37400120596145E-10	2.80534321830536E-08	7.84958785963222E-09
507190	4157690	338.279998779297	1.41287463103022E-05	2.43867266079056E-07	6.67525952591881E-06	2.5623164629973E-06	1.17508408261661E-08	4.68051176529884E-10	2.4290731705819E-08	6.7987584128503E-09
507390	4157690	333.723999023438	1.24392435566271E-05	2.14846406398074E-07	6.16070509873508E-06	2.3581622582731E-06	1.01529603965716E-08	4.06884157889135E-10	2.09852914455124E-08	5.87544998268294E-09
507590	4157690	334.138000488281	1.09390667562426E-05	1.88969858826452E-07	5.6648250946727E-06	2.16276054770378E-06	8.75368071749998E-09	3.53092970163286E-10	1.80909533850465E-08	5.06680455922177E-09
507790	4157690	332.765014648438	9.61151819546559E-06	1.65978340794393E-07	5.1894852444331E-06	1.9766181093697E-06	7.53203621103842E-09	3.05917478910344E-10	1.55642907372948E-08	4.36072368119069E-09
507990	4157690	336.820007324219	8.43946882179498E-06	1.45602411714491E-07	4.73637556886591E-06	1.80017179869045E-06	6.46851368974239E-09	2.64648848287485E-10	1.33648878917059E-08	3.74594674959093E-09
508190	4157690	332.494995117188	7.40644073486556E-06	1.27580644123813E-07	4.30699896936529E-06	1.63379607237148E-06	5.54512246402345E-09	2.28632104239099E-10	1.14554854005291E-08	3.21209143869966E-09
508390	4157690	332.074005126953	6.49710130165884E-06	1.11667972588988E-07	3.90259217742004E-06	1.47777982969598E-06	4.74541278041508E-09	1.97266982453849E-10	9.80201779224684E-09	2.74966436738727E-09
508590	4157690	339.638000488281	5.69744700893226E-06	9.76388872757645E-08	3.52404572553748E-06	1.33229960041926E-06	4.05445429330751E-09	1.70007364294328E-10	8.37356856350722E-09	2.35004872449643E-09
508790	4157690	358.080993652344	4.99482766159503E-06	8.52880024360097E-08	3.17185280605937E-06	1.19740147037176E-06	3.45878465300901E-09	1.46359557622509E-10	7.14226333188732E-09	2.00547461277514E-09
508990	4157690	331.433013916016	4.37789266102773E-06	7.44293731194352E-08	2.84609501442822E-06	1.07299550787698E-06	2.94633686652934E-09	1.25879864372923E-10	6.08311898172166E-09	1.7089771746256E-09
509190	4157690	327.074005126953	3.83650293841235E-06	6.48952739333226E-08	2.5464612269556E-06	9.58861795549863E-07	2.5063523906481E-09	1.08171498218399E-10	5.17386340977957E-09	1.45434642773973E-09
509390	4157690	328.727996826172	3.36163098717035E-06	5.6534807008665E-08	2.27229082398145E-06	8.54665132742197E-07	2.12928579593844E-09	9.28812696792105E-11	4.3947377579206E-09	1.2360722760605E-09
509590	4157690	329.102996826172	2.94525995486678E-06	4.92125079269574E-08	2.02263151033489E-06	7.59975001016248E-07	1.80670551160041E-09	7.96961881540472E-11	3.72829049032913E-09	1.04928729252844E-09
509790	4157690	328.606994628906	2.58028673241677E-06	4.28070132020572E-08	1.79630316618188E-06	6.74287743675666E-07	1.5311940257108E-09	6.83399337144743E-11	3.15917047680651E-09	8.8970914202207E-10
509990	4157690	327.053009033203	2.26043099013301E-06	3.72098134539019E-08	1.59196120753559E-06	5.97048623064415E-07	1.29625021680613E-09	5.85693960159725E-11	2.67392452535032E-09	7.53584235937995E-10
510190	4157690	326.454010009766	1.98015072947126E-06	3.23240944793902E-08	1.40815508005135E-06	5.27672178650387E-07	1.09619568024185E-09	5.0171359373961E-11	2.26080320713024E-09	6.37633697733183E-10
510390	4157690	329.093994140625	1.73456435194551E-06	2.80636619852409E-08	1.24337937285188E-06	4.65559976718363E-07	9.26086324263148E-10	4.29593726744507E-11	1.90957762095469E-09	5.39002371264302E-10
510590	4157690	294.076995849609	1.51937904721018E-06	2.4351941972959E-08	1.09611645858667E-06	4.10115352010195E-07	7.81630020899968E-10	3.6770802802167E-11	1.61136875273755E-09	4.55211310883185E-10
510790	4157690	277.25	1.33082525790515E-06	2.11210531428563E-08	9.64870569130683E-07	3.6075510626568E-07	6.59110765062685E-10	3.14641327885572E-11	1.35849031997124E-09	3.84114034757518E-10
510990	4157690	259.897003173828	1.16559697370617E-06	1.83109463620113E-08	8.48193846985808E-07	3.16918355230209E-07	5.55319480154978E-10	2.69165027632578E-11	1.14430539261928E-09	3.23856617447497E-10
511190	4157690	243.166000366211	1.02079760805366E-06	1.58686083699522E-08	7.44705275510094E-07	2.78072848010778E-07	4.67491382031352E-10	2.3021461560449E-11	9.63096637812832E-10	2.72841557564732E-10
511390	4157690	247.973007202148	8.93891195954244E-07	1.37473275055456E-08	6.5310353526141E-07	2.43719135059963E-07	3.93249691520379E-10	1.96869349719585E-11	8.09949732041452E-10	2.29695303657892E-10
511590	4157690	258.808990478516	7.82658628930878E-07	1.19060198371938E-08	5.72174853930907E-07	2.13392968746613E-07	3.30555363322231E-10	1.68334136242044E-11	6.80649236635928E-10	1.93239253381194E-10
511790	4157690	270.618011474609	6.85158617290993E-07	1.0308613200472E-08	5.0079685565954E-07	1.86666297677843E-07	2.77662443381133E-10	1.4392337098962E-11	5.71586146046064E-10	1.62463998706438E-10
511990	4157690	248.070999145508	5.99693043881977E-07	8.92348648900411E-09	4.37939301502523E-07	1.63147174723024E-07	2.33078629783829E-10	1.23046761726022E-11	4.7967621568236E-10	1.36506581193168E-10
512190	4157690	224.731002807617	5.24776361135652E-07	7.72296179330338E-09	3.82662506231999E-07	1.42478860422916E-07	1.95530566633165E-10	1.05196690962837E-11	4.02288104197338E-10	1.14630468467349E-10
512390	4157690	208.162994384766	4.59108671553915E-07	6.68284663662769E-09	3.34114075269429E-07	1.24338352257414E-07	1.63933433902057E-10	8.99370903068085E-12	3.37180418544194E-10	9.62080075274821E-11
512590	4157690	182.884994506836	4.01552123357168E-07	5.78202172845676E-09	2.91524478015133E-07	1.08434523087538E-07	1.37364406400557E-10	7.68937705446682E-12	2.82446773444149E-10	8.07051147075464E-11
512790	4157690	169.160003662109	3.5111028272185E-07	5.00207174806943E-09	2.5420188605224E-07	9.45060217671864E-08	1.15039556240131E-10	6.57458798759748E-12	2.36467989112949E-10	6.76679454062532E-11
512990	4157690	156.660995483398	3.0691014281516E-07	4.3269555784203E-09	2.21526601283473E-07	8.23190509228447E-08	9.6293814616504E-11	5.6218436934968E-12	1.97870621673942E-10	5.67113255937288E-11
513190	4157690	141.479995727539	2.68186463112644E-07	3.74271454175455E-09	1.92945330123339E-07	7.16651134005332E-08	8.05636478140116E-11	4.80759838363845E-12	1.65491109572796E-10	4.75087579706466E-11
513390	4157690	115.664001464844	2.34268143795322E-07	3.23721338487771E-09	1.67965480953667E-07	6.23587879798874E-08	6.73721194176686E-11	4.11170840522662E-12	1.38344871957077E-10	3.97838061044867E-11
513590	4157690	100.551002502441	2.04566379319231E-07	2.79991022695426E-09	1.46149614715032E-07	5.42355788172826E-08	5.63160247025107E-11	3.51694712639383E-12	1.15599694379993E-10	3.33026656827127E-11
513790	4157690	91.1809997558594	1.7856435913152E-07	2.42165344927212E-09	1.27110146358432E-07	4.714987261141E-08	4.70548426292658E-11	3.00858099695949E-12	9.65528807713947E-11	2.78677815384933E-11
513990	4157690	62.3629989624023	1.55808310320984E-07	2.09450394493684E-09	1.10504355439968E-07	4.09730235351689E-08	3.93012733928524E-11	2.57402085811427E-12	8.06116765040648E-11	2.33123892037165E-11
514190	4157690	20.1189994812012	1.35899700753992E-07	1.81157841959428E-09	9.60297406734122E-08	3.55915757617126E-08	3.28131459093246E-11	2.20251015788218E-12	6.72765421157253E-11	1.94958410943371E-11
514390	4157690	3.01500010490417	1.18488445555423E-07	1.5669120725811E-09	8.34197329732674E-08	3.09056277811297E-08	2.73865087498391E-11	1.88486047646104E-12	5.61268691480014E-11	1.62996164085905E-11
514590	4157690	0	1.03266980752597E-07	1.3553385465477E-09	7.24397701582603E-08	2.68273383177762E-08	2.28497414094538E-11	1.6132264376115E-12	4.68088045395103E-11	1.36239202773839E-11
514790	4157690	0	8.99650866112278E-08	1.17238475496472E-09	6.28837254401678E-08	2.32795694910207E-08	1.90585402080703E-11	1.38090866929091E-12	3.90248847538553E-11	1.13847844313768E-11
482590	4157890	208.128005981445	1.07235646635875E-10	2.31865766208475E-11	5.0843300482559E-11	3.31830234832512E-11	3.64156790812143E-13	1.25853628659055E-13	5.65937884295866E-13	2.42849547985993E-13
482790	4157890	217.386993408203	1.21052096724568E-10	2.59638065538251E-11	5.82829399572913E-11	3.7644344955344E-11	4.30822308816388E-13	1.44748626661472E-13	6.77627202444217E-13	2.86410790608251E-13
482990	4157890	227.522994995117	1.36609441185081E-10	2.90607777418097E-11	6.67944584696364E-11	4.26969563491651E-11	5.09852024963324E-13	1.66417678653656E-13	8.11277110608454E-13	3.3784573165484E-13
483190	4157890	243.352005004883	1.54119172998832E-10	3.25122867829237E-11	7.65297199840574E-11	4.8417904678698E-11	6.03563043776269E-13	1.91259299375605E-13	9.71186622552925E-13	3.98589544741132E-13
483390	4157890	239.669006347656	1.7381710196281E-10	3.63565786287504E-11	8.76617307335427E-11	5.48940693212905E-11	7.14709466494652E-13	2.19727857343988E-13	1.16249178054186E-12	4.70340865139253E-13
483590	4157890	258.644989013672	1.95965960277718E-10	4.0635692904353E-11	1.0038753926483E-10	6.22234295684291E-11	8.46565222525501E-13	2.52341970110267E-13	1.39132764337017E-12	5.55111003381963E-13
483790	4157890	282.649993896484	2.20858245883265E-10	4.53957645079926E-11	1.14931521037128E-10	7.05164415692557E-11	1.00302222194308E-12	2.89693197731093E-13	1.665021195426E-12	6.55281594748583E-13
483990	4157890	302.048004150391	2.48819354457293E-10	5.06873788561741E-11	1.31549109333814E-10	7.98976112099196E-11	1.18870708134768E-12	3.32456268836474E-13	1.99232123298153E-12	7.73673200853998E-13
484190	4157890	339.072998046875	2.80210995845493E-10	5.65659366482821E-11	1.50531031604637E-10	9.05072553480665E-11	1.40911993699058E-12	3.81401077729549E-13	2.38367223059941E-12	9.13626899411406E-13
484390	4157890	356.128997802734	3.15434929566381E-10	6.30919378394224E-11	1.72208100952427E-10	1.02503411493709E-10	1.6707987017288E-12	4.37404608720203E-13	2.85154007061229E-12	1.07909960234572E-12
484590	4157890	317.648986816406	3.54937108680052E-10	7.03314491883109E-11	1.96956679764349E-10	1.16064107424029E-10	1.98151501229632E-12	5.01466930336097E-13	3.4108002202376E-12	1.27477895845307E-12
484790	4157890	308.808013916016	3.99212198133616E-10	7.83565036954327E-11	2.25204876888543E-10	1.31389851698692E-10	2.35050647489353E-12	5.74728461301973E-13	4.07919938842072E-12	1.50621871651484E-12
484990	4157890	291.596008300781	4.48808551514409E-10	8.72455516559127E-11	2.57439541715826E-10	1.4870644458927E-10	2.78875221694703E-12	6.58489457478047E-13	4.87790456000725E-12	1.77999893928818E-12
485190	4157890	265.531005859375	5.04333673205364E-10	9.70839035500957E-11	2.94214234573861E-10	1.68268135839206E-10	3.30929991461153E-12	7.542324858639E-13	5.83215577846103E-12	2.10391598160687E-12
485390	4157890	256.566009521484	5.6646025379559E-10	1.07964232533231E-10	3.36158262862662E-10	1.90361204891109E-10	3.92765411793096E-12	8.63648699430509E-13	6.97204192578703E-12	2.48720794546842E-12
485590	4157890	258.118988037109	6.35932767400063E-10	1.19987003489934E-10	3.83986930134612E-10	2.15307931479829E-10	4.66223547368607E-12	9.88666409452266E-13	8.33342221150334E-12	2.94082054306717E-12
485790	4157890	226.64599609375	7.1357479239955E-10	1.33260965181711E-10	4.38513165226558E-10	2.43471104264119E-10	5.53492561755038E-12	1.13148456313389E-12	9.95902029397518E-12	3.47772243798943E-12
485990	4157890	205.565002441406	8.00297095650016E-10	1.47903626489244E-10	5.00660715650291E-10	2.752590833429E-10	6.57171227405942E-12	1.29461058539238E-12	1.18997226976164E-11	4.11327808120474E-12
486190	4157890	171.307006835938	8.97106672495887E-10	1.64041857685335E-10	5.71479117980074E-10	3.1113158360574E-10	7.80345458617284E-12	1.48090559671498E-12	1.42161189320146E-11	4.86569019459551E-12
486390	4157890	106.917999267578	1.00511675244919E-09	1.81812427673474E-10	6.52160684483495E-10	3.51606144130007E-10	9.26678781755162E-12	1.69363493545873E-12	1.69803273249778E-11	5.75652207570592E-12
486590	4157890	73.3330001831055	1.12555801272963E-09	2.01362640423038E-10	7.44059815624074E-10	3.97265499796323E-10	1.10051948478742E-11	1.93652790260282E-12	2.02781595457075E-11	6.81131667971252E-12
486790	4157890	75.2200012207031	1.259790969042E-09	2.22850728338883E-10	8.48714782751471E-10	4.48765687989417E-10	1.30702686955468E-11	2.21384088374466E-12	2.42116794805874E-11	8.06032297590644E-12
486990	4157890	74.6060028076172	1.40931994003919E-09	2.46446328128713E-10	9.67872478350631E-10	5.06845278206429E-10	1.55232053466007E-11	2.5304312238417E-12	2.89022320959111E-11	9.53935509578324E-12
487190	4157890	78.2910003662109	1.57580897070117E-09	2.72331302507281E-10	1.10351664208349E-09	5.72336076472364E-10	1.84365719115586E-11	2.89184939915002E-12	3.44940299760019E-11	1.12908131172557E-11
487390	4157890	79.6449966430664	1.76109963982808E-09	3.00700297384863E-10	1.2578997337202E-09	6.46174975406386E-10	2.18963879358529E-11	3.3044385276062E-12	4.11583864788382E-11	1.33648810690966E-11
487590	4157890	80.8330001831055	1.96723124990815E-09	3.31761347304273E-10	1.43357909022648E-09	7.29417380018633E-10	2.60045796372709E-11	3.77544929769986E-12	4.90987138760508E-11	1.58209395459663E-11
487790	4157890	85.4850006103516	2.1964637852108E-09	3.6573653430191E-10	1.63345793056003E-09	8.23252415756822E-10	3.08818715862226E-11	4.31317265941673E-12	5.85564196572084E-11	1.87292300462786E-11
487990	4157890	101.266998291016	2.45130407908529E-09	4.02862731019201E-10	1.86083183661984E-09	9.29020165152682E-10	3.66711907211904E-11	4.92709345798188E-12	6.98178557932329E-11	2.21728145041061E-11
488190	4157890	108.51000213623	2.7345358236031E-09	4.43392864671652E-10	2.11944145984122E-09	1.04823148291468E-09	4.35416733745569E-11	5.62807819276119E-12	8.32225023614338E-11	2.62498879047538E-11
488390	4157890	120.959999084473	3.04925330821953E-09	4.87595184235682E-10	2.41353204173033E-09	1.18258898937504E-09	5.16933543490145E-11	6.42854152853725E-12	9.91725868178699E-11	3.10764567920767E-11
488590	4157890	127.975997924805	3.39890091309419E-09	5.35755342724596E-10	2.74792102893771E-09	1.3340127854342E-09	6.13626950638298E-11	7.3427048717276E-12	1.1814439474875E-10	3.67895348980081E-11
488790	4157890	130.457992553711	3.78731778117833E-09	5.88177288230172E-10	3.12807401828474E-09	1.50466840833427E-09	7.28290513902311E-11	8.38686182904232E-12	1.40701538956958E-10	4.35508642264889E-11
488990	4157890	133.266998291016	4.21878984229742E-09	6.45184242656791E-10	3.56019190444135E-09	1.69699888318405E-09	8.64222456187643E-11	9.5796815439863E-12	1.67510511358949E-10	5.1551270587523E-11
489190	4157890	135.966995239258	4.69810903636239E-09	7.07119952422741E-10	4.05130839859765E-09	1.91376068824269E-09	1.02531421217254E-10	1.09425611690379E-11	1.99358886126482E-10	6.10157597580378E-11
489390	4157890	137.658004760742	5.23064138099988E-09	7.74350142259932E-10	4.60940007316601E-09	2.15806436696931E-09	1.21615381832815E-10	1.25000310227928E-11	2.37176594652938E-10	7.22094686398365E-11
489590	4157890	139.919998168945	5.82240727932665E-09	8.47264473454695E-10	5.24351582864002E-09	2.43342246671892E-09	1.44214648249062E-10	1.42802250242671E-11	2.82060749924801E-10	8.54446075755664E-11
489790	4157890	145.639007568359	6.48017378859314E-09	9.26278384087473E-10	5.9639240255031E-09	2.74380377171659E-09	1.70965480591091E-10	1.63154095257857E-11	3.35304564281474E-10	1.01088533324589E-10
489990	4157890	155.736999511719	7.21155169841804E-09	1.01183473439819E-09	6.78225316977578E-09	3.09368508550261E-09	2.0261616354971E-10	1.86425845657913E-11	3.98430972794843E-10	1.19573125691046E-10
490190	4157890	172.289993286133	8.02511751037133E-09	1.10440663263799E-09	7.71167859187544E-09	3.48812035514768E-09	2.40045898380835E-10	2.13041840022206E-11	4.73231649106143E-10	1.41405669760652E-10
490390	4157890	188.807006835938	8.93055023116057E-09	1.20450117582964E-09	8.76712348046935E-09	3.93281555708002E-09	2.84286674516014E-10	2.43488912008772E-11	5.61812181492659E-10	1.67181460020369E-10
490590	4157890	203.287002563477	9.93878686538573E-09	1.3126627558886E-09	9.96548383310983E-09	4.43421192849712E-09	3.36548488943006E-10	2.78325446082842E-11	6.66644253349975E-10	1.97598331831311E-10
490790	4157890	218.29899597168	1.10622003773974E-08	1.42947745274182E-09	1.13258806317918E-08	4.9995797116237E-09	3.98248390036261E-10	3.18191836377666E-11	7.90625760795806E-10	2.33473405155786E-10
490990	4157890	228.610000610352	1.23148026969003E-08	1.55557870745032E-09	1.28699418878794E-08	5.63712348790597E-09	4.7104382751516E-10	3.63822559485846E-11	9.37149877823083E-10	2.75762324531138E-10
491190	4157890	230.949005126953	1.37124744097461E-08	1.69164988726555E-09	1.46221171050017E-08	6.35609721111684E-09	5.56870772917806E-10	4.16058685315461E-11	1.11018413486875E-09	3.25581192141966E-10
491390	4157890	235.483001708984	1.52732277998762E-08	1.83843487154876E-09	1.66100281455875E-08	7.16693750296173E-09	6.57987284352114E-10	4.75864187532967E-11	1.31436069380233E-09	3.84231755314487E-10
491590	4157890	232.050994873047	1.70174942357922E-08	1.99674236555101E-09	1.88648350558803E-08	8.08139832440059E-09	7.77022923938901E-10	5.44342373198745E-11	1.55507895341113E-09	4.53229879412402E-10
491790	4157890	236.212997436523	1.89684449065585E-08	2.16745458155537E-09	2.14216264564616E-08	9.11269730013361E-09	9.17034714280291E-10	6.2275540572879E-11	1.83862171581596E-09	5.3433785160239E-10
491990	4157890	238.516998291016	2.11523976057743E-08	2.35153638416267E-09	2.43199850893707E-08	1.02757255051817E-08	1.08157009893675E-09	7.12545029544387E-11	2.17228604230996E-09	6.29600676396896E-10
492190	4157890	242.328994750977	2.35992265696454E-08	2.55004910966427E-09	2.76044698041776E-08	1.15872301059353E-08	1.27473756718862E-09	8.15357792205483E-11	2.56452993968814E-09	7.4138690832704E-10
492390	4157890	254.865997314453	2.63428318924861E-08	2.7641599377061E-09	3.132518146204E-08	1.30660244131421E-08	1.50128515868183E-09	9.33070726412762E-11	3.02513570870092E-09	8.724339461094E-10
492590	4157890	264.998992919922	2.94216666004233E-08	2.9951571327233E-09	3.5538383654869E-08	1.4733221457795E-08	1.76668735139751E-09	1.06782102541106E-10	3.5653906488652E-09	1.02589823238581E-09
492790	4157890	279.2919921875	3.28793212460287E-08	3.24446299290945E-09	4.03071760158349E-08	1.66124850606629E-08	2.07724031498713E-09	1.22203730030439E-10	4.19828535430779E-09	1.2054102442331E-09
492990	4157890	307.748992919922	3.67651725863798E-08	3.51365155060797E-09	4.57022208343114E-08	1.87303031628335E-08	2.44016547294824E-09	1.3984744219834E-10	4.93872932268022E-09	1.41513434771111E-09
493190	4157890	324.227996826172	4.11351004274027E-08	3.80446729743737E-09	5.18025218737137E-08	2.11162806329141E-08	2.86372089896535E-09	1.60025070517437E-10	5.80378282692112E-09	1.65983314608429E-09
493390	4157890	326.234008789062	4.60522730919555E-08	4.11884058926858E-09	5.86962526341934E-08	2.38034477738048E-08	3.35731936432857E-09	1.83088508402489E-10	6.8129030102537E-09	1.94493560703749E-09
493590	4157890	336.686004638672	5.15880032318913E-08	4.45890791261352E-09	6.64816299499137E-08	2.6828588284544E-08	3.93165133774915E-09	2.09433672267133E-10	7.9882009412199E-09	2.27660828123971E-09
493790	4157890	336.260986328125	5.78226906510351E-08	4.82704372483408E-09	7.52678258611967E-08	3.02325884296603E-08	4.59881135207326E-09	2.39504874894542E-10	9.35470474460351E-09	2.661828438401E-09
493990	4157890	333.755004882812	6.48468312724155E-08	5.22587560113631E-09	8.51759062855129E-08	3.40607851752818E-08	5.37242370535425E-09	2.73798691750463E-10	1.09406218840928E-08	3.10845660539814E-09
494190	4157890	332.111999511719	7.27621060984688E-08	5.65831283993054E-09	9.63397839875957E-08	3.83633280914853E-08	6.26776321241744E-09	3.12867936850843E-10	1.27775914240882E-08	3.62530652199496E-09
494390	4157890	334.402008056641	8.16825438859826E-08	6.12757128899408E-09	1.08907164286486E-07	4.3195536205768E-08	7.30186505421667E-09	3.57324989459288E-10	1.49009139951567E-08	4.22220869471764E-09
494590	4157890	328.597991943359	9.17357521035218E-08	6.63719508865449E-09	1.23040460282708E-07	4.86182418800337E-08	8.49361638118627E-09	4.07844301790293E-10	1.73497440803872E-08	4.91006333638825E-09
494790	4157890	331.216003417969	1.03064209941004E-07	7.1910899307755E-09	1.38917650057583E-07	5.46981211242858E-08	9.86382081184436E-09	4.65164499181665E-10	2.01672255880696E-08	5.70087793545419E-09
494990	4157890	341.338012695312	1.15826600101409E-07	7.79354379473617E-09	1.56733031609846E-07	6.15079789998304E-08	1.14352238127842E-08	5.30088622409698E-10	2.34005468878031E-08	6.60778205902483E-09
495190	4157890	356.352996826172	1.30199192360837E-07	8.44925211456303E-09	1.76697844760413E-07	6.91269898722302E-08	1.32324859970394E-08	6.03482695959347E-10	2.71008875547915E-08	7.64501214912483E-09
495390	4157890	352.412994384766	1.46377223152525E-07	9.16333909210303E-09	1.99040678372E-07	7.76408577607499E-08	1.52820886557693E-08	6.86271939585238E-10	3.13232241298723E-08	8.8278571231017E-09
495590	4157890	347.929992675781	1.64576213061663E-07	9.94136219503229E-09	2.24007587198764E-07	8.7141861189452E-08	1.76121531252153E-08	7.79433607045497E-10	3.6125957725379E-08	1.01725541543381E-08
495790	4157890	341.098999023438	1.85033252493162E-07	1.07893293844205E-08	2.51861874628185E-07	9.77287856858846E-08	2.02521548774158E-08	8.8398672648276E-10	4.15703224197046E-08	1.16961239246001E-08
495990	4157890	357.381988525391	2.08008238763464E-07	1.17136959643285E-08	2.82883485847539E-07	1.09506702722961E-07	2.32325106347079E-08	1.00097701796914E-09	4.77195302443246E-08	1.34161323366158E-08
496190	4157890	357.266998291016	2.33784949659632E-07	1.27213535928016E-08	3.17367851521082E-07	1.22586545463513E-07	2.65840168822922E-08	1.13145667975395E-09	5.46376074890558E-08	1.53503664293214E-08
496390	4157890	353.932006835938	2.62671901329831E-07	1.38196096526245E-08	3.5562408140468E-07	1.37084443884305E-07	3.03371185812014E-08	1.27645826395135E-09	6.23878783114995E-08	1.75164122272055E-08
496590	4157890	364.680999755859	2.95002972151556E-07	1.5016150436945E-08	3.97972426529333E-07	1.53120785745263E-07	3.45209894104637E-08	1.43696217894644E-09	7.10310565473935E-08	1.99311237926981E-08
496790	4157890	361.507995605469	3.31137729710967E-07	1.63189912389964E-08	4.4474088818756E-07	1.70818961470769E-07	3.9162409371685E-08	1.61385748662124E-09	8.06229160271363E-08	2.26099753468392E-08
496990	4157890	364.743011474609	3.71461393636247E-07	1.77363722904177E-08	4.96260858225627E-07	1.90303725002598E-07	4.42844305074364E-08	1.80789328794877E-09	9.12115238581981E-08	2.55662903402876E-08
497190	4157890	357.373992919922	4.16384435713495E-07	1.92766517757551E-08	5.52861713103627E-07	2.1169917546922E-07	4.99048371878833E-08	2.01962409399918E-09	1.02834045138799E-07	2.88103522199166E-08
497390	4157890	378.868011474609	4.6634182684793E-07	2.09482055284963E-08	6.14864301256124E-07	2.35126344019928E-07	5.60344192120431E-08	2.24935044620613E-09	1.15513155990684E-07	3.23484076218886E-08
497590	4157890	388.834014892578	5.21791931599528E-07	2.27592753477532E-08	6.82573295991303E-07	2.60700338636874E-07	6.26750903711414E-08	2.49705275381707E-09	1.29253137577492E-07	3.61815798083377E-08
497790	4157890	387.740997314453	5.83215276106905E-07	2.47177969803375E-08	7.56268513739597E-07	2.8852710280692E-07	6.98179106584329E-08	2.76232154498207E-09	1.44035770079435E-07	4.03047263106672E-08
497990	4157890	383.921997070312	6.51113017424754E-07	2.68311978152248E-08	8.36195174314342E-07	3.1869977327102E-07	7.74410942490209E-08	3.04428771908714E-09	1.59816195981117E-07	4.47052884191936E-08
498190	4157890	376.640991210938	7.26005755983166E-07	2.9106189029177E-08	9.22553513917224E-07	3.51294800827516E-07	8.55081102639737E-08	3.34155623617902E-09	1.76518975281498E-07	4.93621941983276E-08
498390	4157890	374.557006835938	8.08433306624323E-07	3.15485862886984E-08	1.0154882229055E-06	3.86368026266578E-07	9.39660088842912E-08	3.65214794050892E-09	1.94034607706385E-07	5.42448915765255E-08
498590	4157890	383.196990966797	8.98955990725746E-07	3.41631617824168E-08	1.11507829190937E-06	4.23950923687795E-07	1.02744127152214E-07	3.97345525455407E-09	2.12216842000759E-07	5.93126007810508E-08
498790	4157890	387.321014404297	9.98158025243008E-07	3.69535189224194E-08	1.22132795719435E-06	4.64047254830204E-07	1.11753342983242E-07	4.30221713210265E-09	2.30881122403501E-07	6.45138831108551E-08
498990	4157890	411.359985351562	1.10665454917741E-06	3.99220431374714E-08	1.33415998791273E-06	5.06630616783822E-07	1.20886049164461E-07	4.63451874703822E-09	2.49804529171599E-07	6.97866249031401E-08
499190	4157890	407.005004882812	1.22510363976316E-06	4.30700192758564E-08	1.45341260264119E-06	5.51643405346813E-07	1.30017008164364E-07	4.96582411535949E-09	2.68727545234691E-07	7.50585309615566E-08
499390	4157890	424.9169921875	1.35422498408883E-06	4.63979207075864E-08	1.57884154431918E-06	5.98997748761875E-07	1.39005216171368E-07	5.29104424301773E-09	2.87357916774708E-07	8.02482005131565E-08
499590	4157890	419.584991455078	1.49482703644513E-06	4.99059222113985E-08	1.71012895949666E-06	6.48579038778593E-07	1.47696853873419E-07	5.60464351753686E-09	3.05376768740025E-07	8.52668304767168E-08
499790	4157890	426.459014892578	1.6478445001763E-06	5.35946984514484E-08	1.84690069197911E-06	7.00252679298653E-07	1.55929329846961E-07	5.90078488520221E-09	3.22446987300779E-07	9.00205496310643E-08
499990	4157890	428.131988525391	1.81438775047341E-06	5.74665613722651E-08	1.98875334087327E-06	7.53874573634208E-07	1.63536333673469E-07	6.17351120388591E-09	3.38223697098561E-07	9.44133360205519E-08
500190	4157890	438.234985351562	1.99580526251102E-06	6.15269280452606E-08	2.13529186973724E-06	8.09305628691936E-07	1.70353715081575E-07	6.41695428976057E-09	3.52366454832837E-07	9.83504107969915E-08
500390	4157890	439.600006103516	2.19375929736171E-06	6.57861797969769E-08	2.28617771702008E-06	8.66430297089741E-07	1.76225911263391E-07	6.62556480573655E-09	3.6455257888556E-07	1.01741949258381E-07
500590	4157890	452.473999023438	2.41031521802562E-06	7.02618529408302E-08	2.44118614151701E-06	9.2517866234099E-07	1.81012554159877E-07	6.79434858581515E-09	3.74490852997234E-07	1.04506896014428E-07
500790	4157890	459.841003417969	2.64804863561571E-06	7.49810512459688E-08	2.60027012854262E-06	9.85551032313419E-07	1.84594828739644E-07	6.91909273704917E-09	3.8193471604468E-07	1.06576636081278E-07
500990	4157890	464.460998535156	2.91011903887006E-06	7.99829976615813E-08	2.76362675214412E-06	1.04764350785293E-06	1.86881133254108E-07	6.99656775272141E-09	3.86694003522635E-07	1.07898263489556E-07
501190	4157890	456.893005371094	3.20039126589207E-06	8.53214796572181E-08	2.93176060142284E-06	1.11167242474415E-06	1.8781160897956E-07	7.02468621465966E-09	3.8864434969748E-07	1.08437196358668E-07
501390	4157890	447.803009033203	3.52353530553276E-06	9.10670848882118E-08	3.10553805676107E-06	1.17799536178461E-06	1.87361182995806E-07	7.00261065946456E-09	3.87733502453571E-07	1.08178934217993E-07
501590	4157890	441.846984863281	3.88509991673584E-06	9.73089840920951E-08	3.28622599700232E-06	1.24712624437725E-06	1.85540871721389E-07	6.93079979730516E-09	3.83984031606026E-07	1.07129811655727E-07
501790	4157890	439.328002929688	4.29156685450228E-06	1.04155996995203E-07	3.47550900037317E-06	1.31974223323253E-06	1.82397235525264E-07	6.81098776650859E-09	3.77492203600312E-07	1.05316684046233E-07
501990	4157890	437.451995849609	4.75062659596365E-06	1.11741160163306E-07	3.67555656505833E-06	1.39671089470009E-06	1.78010029049101E-07	6.64609835922982E-09	3.68423115030801E-07	1.02785571340211E-07
502190	4157890	424.596008300781	5.27302844609553E-06	1.20253048657198E-07	3.88954412946823E-06	1.47929816042806E-06	1.72488241916027E-07	6.44010268605138E-09	3.57002487065261E-07	9.95993729872944E-08
502390	4157890	432.471008300781	5.87013309382724E-06	1.29893073520234E-07	4.12087385303686E-06	1.5688599699375E-06	1.65964847693451E-07	6.1978298476331E-09	3.43505781560426E-07	9.58348366141549E-08
502590	4157890	435.649993896484	6.5544784563036E-06	1.40884254937401E-07	4.37328257310911E-06	1.66688682500803E-06	1.58590667989442E-07	5.92474574974193E-09	3.28245481477985E-07	9.15790154890397E-08
502790	4157890	430.826995849609	7.34011307982887E-06	1.53475936566865E-07	4.65087010871322E-06	1.77501701891231E-06	1.50527801617645E-07	5.62671990972216E-09	3.11557465490496E-07	8.69254764586185E-08
502990	4157890	418.657989501953	8.24491328238445E-06	1.67983318354548E-07	4.95857178300895E-06	1.8952323636852E-06	1.41943057836775E-07	5.3097888215893E-09	2.93787394710876E-07	8.19705085782181E-08
503190	4157890	424.441009521484	9.28504610382209E-06	1.84691220316866E-07	5.30043329712039E-06	2.02917442156215E-06	1.33001793859871E-07	4.97993483536408E-09	2.75277935857272E-07	7.68095654099796E-08
503390	4157890	422.339996337891	1.04767560245009E-05	2.03882744210325E-07	5.68019695422917E-06	2.17837427485806E-06	1.2386247603138E-07	4.64289112278597E-09	2.56357484487414E-07	7.15341251067277E-08
503590	4157890	425.007995605469	1.18385172043522E-05	2.25875949990259E-07	6.10173538039405E-06	2.34443242925949E-06	1.14672189468575E-07	4.30398063278015E-09	2.37330854615038E-07	6.62290980034476E-08
503790	4157890	415.661010742188	1.33891764919422E-05	2.50987347050915E-07	6.56830456347977E-06	2.52872605334563E-06	1.05563220629488E-07	3.9679934694372E-09	2.1847219285313E-07	6.0970853571067E-08
503990	4157890	410.170013427734	1.51468723289081E-05	2.7951812329309E-07	7.08218311708982E-06	2.73227006479876E-06	9.66507429854485E-08	3.63910377076829E-09	2.00020179696596E-07	5.58258841630556E-08
504190	4157890	405.859985351562	1.71278512062438E-05	3.11738449825731E-07	7.64426887254385E-06	2.95556159423048E-06	8.80315564557939E-08	3.32082478241298E-09	1.82175415018214E-07	5.08500772444322E-08
504390	4157890	394.393005371094	1.93432639195443E-05	3.47820523359698E-07	8.25297165712127E-06	3.1981377999733E-06	7.97837692755169E-08	3.01599667886344E-09	1.65099758972375E-07	4.6088531299499E-08
504590	4157890	388.795989990234	2.17760899967905E-05	3.87437899813414E-07	8.89854104701169E-06	3.45627366862718E-06	7.19672731527943E-08	2.72680276378923E-09	1.48917317736832E-07	4.15758296797313E-08
504790	4157890	390.35400390625	2.44001281485217E-05	4.30097371613563E-07	9.56767533860953E-06	3.72485669911626E-06	6.46248429431517E-08	2.45480915781718E-09	1.33716722533678E-07	3.73366753766306E-08
504990	4157890	386.893005371094	2.71671037425803E-05	4.74912021158495E-07	1.02406504341427E-05	3.99620613768081E-06	5.77836878075872E-08	2.20102095635231E-09	1.19554344201096E-07	3.33867865031208E-08
505190	4157890	387.154998779297	2.99892047234399E-05	5.20298274505452E-07	1.08878276323527E-05	4.25861955438156E-06	5.14572905114137E-08	1.96594760493358E-09	1.0645810685247E-07	2.97339577452199E-08
505390	4157890	384.019989013672	3.27066277771184E-05	5.63448011294001E-07	1.14646685996562E-05	4.49423700639319E-06	4.56473930300271E-08	1.74967395478496E-09	9.44316041418021E-08	2.63792063998375E-08
505590	4157890	380.527008056641	3.51172295529155E-05	6.00855382428851E-07	1.19199898622262E-05	4.68235526183288E-06	4.0346009287736E-08	1.55193235958694E-09	8.34582716333372E-08	2.33179340863747E-08
505790	4157890	372.93798828125	3.29329907252069E-05	5.64599944967039E-07	1.15982902758411E-05	4.54308280093265E-06	3.55373721443736E-08	1.37217250976051E-09	7.35054226982789E-08	2.05410505305228E-08
505990	4157890	363.158996582031	2.99085670775381E-05	5.14227097282008E-07	1.10725026220325E-05	4.32117169823582E-06	3.1199747028298E-08	1.2096265457558E-09	6.45280078206522E-08	1.80360203798451E-08
506190	4157890	358.117004394531	2.68852432820174E-05	4.63382359307024E-07	1.04861286691203E-05	4.07711253087887E-06	2.7307067618501E-08	1.06336795594605E-09	5.64720047923771E-08	1.57878073674721E-08
506390	4157890	350.973999023438	2.40005677170214E-05	4.14533177244778E-07	9.87450055364251E-06	3.82522780035512E-06	2.38303683404106E-08	9.32362794221574E-10	4.92773879306833E-08	1.37797009648504E-08
506590	4157890	350.759002685547	2.13299189995246E-05	3.69060779497617E-07	9.2585069921412E-06	3.57393555393489E-06	2.07390050099424E-08	8.15513985128813E-10	4.28806575105576E-08	1.19940210899002E-08
506790	4157890	352.596008300781	1.89020969704652E-05	3.27522440993058E-07	8.64853132939484E-06	3.32733752959628E-06	1.8001666140663E-08	7.11697774772464E-10	3.72169354859488E-08	1.04127017926823E-08
506990	4157890	344.848999023438	1.67190063393342E-05	2.89998945886729E-07	8.04945995640786E-06	3.08724787525783E-06	1.55871867905382E-08	6.19793166793357E-10	3.22216518001481E-08	9.01776099266306E-09
507190	4157890	337.593994140625	1.47669526459401E-05	2.56298201789276E-07	7.4636500370601E-06	2.85439380467512E-06	1.34651823352974E-08	5.38704988799508E-10	2.78318573323558E-08	7.79166632066519E-09
507390	4157890	337.953002929688	1.3020145811393E-05	2.2602354804319E-07	6.89198973940564E-06	2.62884169587296E-06	1.16065227409564E-08	4.6738122116149E-10	2.3987206232963E-08	6.71760889058938E-09
507590	4157890	340.566986083984	1.1464534108323E-05	1.98957256075692E-07	6.33754927440288E-06	2.41155937057577E-06	9.98366910312744E-09	4.04825002892328E-10	2.06306530912287E-08	5.77969738156357E-09
507790	4157890	337.289001464844	1.00847276134537E-05	1.74857048244208E-07	5.80341862249117E-06	2.20350599620944E-06	8.57089478262196E-09	3.50103154968953E-10	1.77089103730431E-08	4.9630858569527E-09
507990	4157890	333.227996826172	8.86415515655882E-06	1.53459977871908E-07	5.29243570785944E-06	2.00553654194176E-06	7.34441140462906E-09	3.02351032111736E-10	1.51727089066018E-08	4.25404654895127E-09
508190	4157890	332.959014892578	7.78652905063153E-06	1.34506074097464E-07	4.80711399961587E-06	1.81839081352333E-06	6.282418711049E-09	2.60774402490229E-10	1.29769007743045E-08	3.63999858151606E-09
508390	4157890	336.914001464844	6.83651338961213E-06	1.17749021701863E-07	4.34951209057701E-06	1.64265326195519E-06	5.3650953568931E-09	2.24649396724053E-10	1.10804396940887E-08	3.10950271953324E-09
508590	4157890	340.27099609375	5.99998932936521E-06	1.02960363713186E-07	3.92112830435868E-06	1.47871767152698E-06	4.57454511964513E-09	1.93320807835413E-10	9.4462690706169E-09	2.65223037113639E-09
508790	4157890	339.009002685547	5.26412117901982E-06	8.99305764537684E-08	3.52285036934443E-06	1.32676970505881E-06	3.89471089496609E-09	1.66199192839202E-10	8.04114335288078E-09	2.25891398681033E-09
508990	4157890	331.89599609375	4.61732821367261E-06	7.84687199627598E-08	3.15496142108506E-06	1.18678885159275E-06	3.31126673613344E-09	1.42757131474904E-10	6.83540399142421E-09	1.92128477480637E-09
509190	4157890	333.736999511719	4.04921502429431E-06	6.84014986908123E-08	2.81719031985199E-06	1.0585659785207E-06	2.81149624028861E-09	1.22524942039873E-10	5.80272719005212E-09	1.63200252251666E-09
509390	4157890	328.445007324219	3.55048605380549E-06	5.95721253603375E-08	2.50879037066724E-06	9.41731000828171E-07	2.384163970435E-09	1.05086262324718E-10	4.91985714341862E-09	1.38458146183418E-09
509590	4157890	328.326995849609	3.11285618231637E-06	5.1839149370577E-08	2.22863165694955E-06	8.35785437183178E-07	2.01938490981163E-09	9.00735151162429E-11	4.16633527495828E-09	1.17331498685969E-09
509790	4157890	329.904998779297	2.72896253452812E-06	4.50753086195165E-08	1.97529544556083E-06	7.40135727836149E-07	1.70849573189816E-09	7.71633249709513E-11	3.52423338202122E-09	9.93201374089402E-10
509990	4157890	330.170989990234	2.39227963941252E-06	3.91664253864633E-08	1.74716279866512E-06	6.54124491128232E-07	1.44393076135271E-09	6.60721367719979E-11	2.97789649666615E-09	8.39872232636221E-10
510190	4157890	344.079010009766	2.0970388058462E-06	3.40103494082365E-08	1.54249279567707E-06	5.77058062730535E-07	1.21910449154863E-09	5.65520567611858E-11	2.51369936697484E-09	7.09524737344853E-10
510390	4157890	338.571014404297	1.83815210552462E-06	2.95159464666895E-08	1.35948827038251E-06	5.08229560923783E-07	1.02830188940287E-09	4.83869553000607E-11	2.11981911269408E-09	5.98858352274862E-10
510590	4157890	340.427001953125	1.61114120175894E-06	2.56021325377827E-08	1.19634871825604E-06	4.4693735345829E-07	8.66577159215883E-10	4.13888319409846E-11	1.78602546810986E-09	5.05016420436732E-10
510790	4157890	298.011993408203	1.41207119936296E-06	2.21969569406045E-08	1.05131111057821E-06	3.92499193787679E-07	7.29661297411231E-10	3.53945563939861E-11	1.5034891907468E-09	4.25532856980964E-10
510990	4157890	276.161010742188	1.23748963754644E-06	1.92367330977371E-08	9.22679962331717E-07	3.4426251152823E-07	6.13878327268787E-10	3.026285812086E-11	1.26460853253086E-09	3.5828382487342E-10
511190	4157890	293.707000732422	1.08437067966188E-06	1.66652222448058E-08	8.08848254896637E-07	3.01611437943543E-07	5.16069994356056E-10	2.58716189443307E-11	1.06285324816626E-09	3.01444293436718E-10
511390	4157890	288.27099609375	9.50064465427375E-07	1.44328718602344E-08	7.08310839627403E-07	2.63971154029615E-07	4.33528504039278E-10	2.21154530170271E-11	8.92625274653896E-10	2.5344923811059E-10
511590	4157890	294.669006347656	8.3225150246469E-07	1.24961098245222E-08	6.1967184846432E-07	2.30810112267888E-07	3.63936777652586E-10	1.89035449580003E-11	7.4913499824039E-10	2.12959172004615E-10
511790	4157890	279.484008789062	7.28901890690958E-07	1.08166948143567E-08	5.41647463728731E-07	2.0164062005435E-07	3.05315678167409E-10	1.61577419164118E-11	6.28291969261443E-10	1.78829703313547E-10
511990	4157890	243.089996337891	6.38239103988768E-07	9.36112220135497E-09	4.73065201868535E-07	1.76018200850542E-07	2.55977605621321E-10	1.38108839286455E-11	5.26608811867575E-10	1.50084774140495E-10
512190	4157890	226.350997924805	5.58708008683786E-07	8.1000842159569E-09	4.12860684191731E-07	1.53540083247034E-07	2.14485838882783E-10	1.18053146847545E-11	4.41117052227119E-10	1.25893199016967E-10
512390	4157890	215.910995483398	4.88946749892266E-07	7.00798113156414E-09	3.60072656072972E-07	1.33843090557962E-07	1.79619066898059E-10	1.00915859208034E-11	3.692936959037E-10	1.05548202104937E-10
512590	4157890	192.156997680664	4.2776214834755E-07	6.0624818748964E-09	3.13836874653714E-07	1.16601153608012E-07	1.50340551990213E-10	8.62733114503634E-12	3.08997401908874E-10	8.84496289749903E-11
512790	4157890	184.341003417969	3.74108229384009E-07	5.24412891734994E-09	2.73379335400844E-07	1.01522613127984E-07	1.25771387864913E-10	7.37626604306588E-12	2.58413146086398E-10	7.40885073635572E-11
512990	4157890	179.800003051758	3.27067533541875E-07	4.53598659005743E-09	2.38009203738701E-07	8.83474433584104E-08	1.05167387587443E-10	6.30733399100793E-12	2.16004386174545E-10	6.20337079943041E-11
513190	4157890	180.643997192383	2.85834867026151E-07	3.92332974533163E-09	2.07111722053894E-07	7.68444924441714E-08	8.78991765659474E-11	5.39397950428297E-12	1.80471873849153E-10	5.19204657248058E-11
513390	4157890	156.759002685547	2.49703184857755E-07	3.39336637428448E-09	1.80141268326466E-07	6.68087991593976E-08	7.34350660034881E-11	4.61350855418274E-12	1.50718227698604E-10	4.34404953931128E-11
513590	4157890	124.309997558594	2.18051329535299E-07	2.93499182982197E-09	1.56614704755201E-07	5.80590344186912E-08	6.13263502090344E-11	3.94652384622052E-12	1.25817526359822E-10	3.63334967685531E-11
513790	4157890	98.7649993896484	1.90333376696766E-07	2.53857320997586E-09	1.36105103129575E-07	5.04350979885844E-08	5.11947267444055E-11	3.37645759595932E-12	1.04989286973826E-10	3.03798964634498E-11
513990	4157890	68.2480010986328	1.66069368806373E-07	2.19575941847676E-09	1.18235896636407E-07	4.3795885492787E-08	4.27215393110392E-11	2.88915981084182E-12	8.75762211063086E-11	2.53946344277769E-11
514190	4157890	49.3919982910156	1.44837246548906E-07	1.89931468581731E-09	1.02675483010443E-07	3.80172333117172E-08	3.5638612218665E-11	2.47254913725657E-12	7.30252927679298E-11	2.12218738917759E-11
514390	4157890	24.6299991607666	1.26265812216366E-07	1.64297272872618E-09	8.91322824483581E-08	3.29900408312544E-08	2.97204388644498E-11	2.11631453204209E-12	6.08715644453534E-11	1.77304895195332E-11
514590	4157890	0	1.10028584055815E-07	1.42130909116494E-09	7.73502438295184E-08	2.86185661603169E-08	2.47775395841416E-11	1.81165570046287E-12	5.07244712333872E-11	1.48102292743578E-11
514790	4157890	0	9.5838419753891E-08	1.22962966462529E-09	6.71047806529924E-08	2.48188873452379E-08	2.06508195646458E-11	1.55106116154411E-12	4.22561543422424E-11	1.23684511757054E-11
482590	4158090	214.718994140625	1.18366304406427E-10	2.58728950926019E-11	5.4940268363304E-11	3.63807173369239E-11	4.01175536367477E-13	1.44565331146686E-13	6.13026514375537E-13	2.69109429362208E-13
482790	4158090	227.083999633789	1.3366249062924E-10	2.89850082821548E-11	6.2998263193896E-11	4.12794808392192E-11	4.74369941080134E-13	1.66315203258713E-13	7.34065811647546E-13	3.17252661016746E-13
482990	4158090	239.320999145508	1.50894231047992E-10	3.24573210478733E-11	7.22207185782776E-11	4.68288295210613E-11	5.61138360472999E-13	1.9126411101589E-13	8.78992991607241E-13	3.74093959276791E-13
483190	4158090	252.014999389648	1.70297765542562E-10	3.63293351821384E-11	8.27729442483098E-11	5.31136722892431E-11	6.64023559462319E-13	2.19872492987583E-13	1.05249467104914E-12	4.41216990763974E-13
483390	4158090	253.404006958008	1.92136274372308E-10	4.06444788312814E-11	9.4842710556666E-11	6.0229531923166E-11	7.86023646469566E-13	2.52664357647741E-13	1.26012150892759E-12	5.20481731012718E-13
483590	4158090	272.795013427734	2.16703416923121E-10	4.54504903128528E-11	1.08644517173434E-10	6.82843302185153E-11	9.30725490313777E-13	2.90237855024155E-13	1.50855386130609E-12	6.14102824921956E-13
483790	4158090	307.096008300781	2.44326256712692E-10	5.07998271583316E-11	1.24422685727709E-10	7.73997651407892E-11	1.10239473530174E-12	3.33275579820462E-13	1.80577555176494E-12	7.24703332991166E-13
483990	4158090	325.938995361328	2.75368746695417E-10	5.67500399173622E-11	1.42455405729762E-10	8.77130091852575E-11	1.30610312785988E-12	3.8255592175121E-13	2.16132390137453E-12	8.55389511743505E-13
484190	4158090	362.692993164062	3.10235564622771E-10	6.33642019560487E-11	1.63059356051006E-10	9.93786511440241E-11	1.5478810342366E-12	4.38966537893725E-13	2.58658993659981E-12	1.00984048717562E-12
484390	4158090	353.539001464844	3.49376303700746E-10	7.07113493065978E-11	1.86594950586588E-10	1.12570869387522E-10	1.83489887915758E-12	5.03519943683458E-13	3.09517612380721E-12	1.19241477150331E-12
484590	4158090	341.774993896484	3.93290044769696E-10	7.88668328799465E-11	2.13472272635605E-10	1.27485797379135E-10	2.17568186139857E-12	5.77369116255576E-13	3.7033220431973E-12	1.40827484286973E-12
484790	4158090	326.345001220703	4.42530413158188E-10	8.79128939085251E-11	2.44157838521011E-10	1.44344331164515E-10	2.58036635408744E-12	6.61828697342355E-13	4.43041193098149E-12	1.66353759412517E-12
484990	4158090	295.990997314453	4.97711092983127E-10	9.79391529307856E-11	2.79182255610782E-10	1.63395204015809E-10	3.06100370735088E-12	7.58397378689458E-13	5.29957844604274E-12	1.96545122057045E-12
485190	4158090	300.036010742188	5.59511899077505E-10	1.09043152421858E-10	3.19148912527055E-10	1.84918467634997E-10	3.63192097028106E-12	8.68783482551922E-13	6.33842108733478E-12	2.3226049217304E-12
485390	4158090	268.032989501953	6.28685420479304E-10	1.21330898887105E-10	3.6474384035545E-10	2.09229395271554E-10	4.31014933822351E-12	9.94934626357091E-13	7.57986074222906E-12	2.74517777836063E-12
485590	4158090	260.350006103516	7.06064340815643E-10	1.3491744999272E-10	4.16746902253766E-10	2.36682892702249E-10	5.11593262051985E-12	1.13907178442683E-12	9.06315570376941E-12	3.24523376779977E-12
485790	4158090	226.84700012207	7.92569436417256E-10	1.49927410156043E-10	4.76044488727186E-10	2.67678393531656E-10	6.0733289552719E-12	1.30372643292066E-12	1.08351091014348E-11	3.83706990973573E-12
485990	4158090	199.083999633789	8.89218482858395E-10	1.66495533322099E-10	5.43643966227185E-10	3.02665455372093E-10	7.21092550561403E-12	1.4917846260501E-12	1.29515032569221E-11	4.53762980603445E-12
486190	4158090	199.082000732422	9.97136048966879E-10	1.84767310112703E-10	6.20689994448961E-10	3.42150019859996E-10	8.56268511979053E-12	1.70653696622505E-12	1.54788027393391E-11	5.36699291349138E-12
486390	4158090	132.598999023438	1.11756443716319E-09	2.04899682090193E-10	7.08483060012222E-10	3.86701553282185E-10	1.01689509245053E-11	1.9517378654028E-12	1.84961755017962E-11	6.34895516779474E-12
486590	4158090	96.7279968261719	1.25187579639831E-09	2.27061642935027E-10	8.08500558454873E-10	4.36961033702244E-10	1.20776341113427E-11	2.23167125874283E-12	2.20978903826063E-11	7.51171436107335E-12
486790	4158090	76.7490005493164	1.40158570417181E-09	2.51434997452658E-10	9.22420741489371E-10	4.93650072357402E-10	1.43456218505387E-11	2.55122903641395E-12	2.63961607327926E-11	8.88868341446175E-12
486990	4158090	77.2630004882812	1.56836816429927E-09	2.78214770373098E-10	1.05214972370671E-09	5.57580914004934E-10	1.7040436600195E-11	2.9159929852437E-12	3.15245076444131E-11	1.05194443053375E-11
487190	4158090	77.9830017089844	1.75407257092006E-09	3.07609794224397E-10	1.19985221759998E-09	6.29667896346022E-10	2.0242200592246E-11	3.33233258880227E-12	3.76417445802774E-11	1.24508787732499E-11
487390	4158090	78.0139999389648	1.9607430462646E-09	3.39843676342952E-10	1.36798657534319E-09	7.10940705220861E-10	2.40459631330586E-11	3.80752595044565E-12	4.49366977909732E-11	1.4738511537863E-11
487590	4158090	81.5970001220703	2.19064006723705E-09	3.75155403522991E-10	1.55934436180049E-09	8.02559031688703E-10	2.85644411165854E-11	4.34988965825041E-12	5.3633780819646E-11	1.74480870473137E-11
487790	4158090	82.9619979858398	2.44626505817028E-09	4.13800041991232E-10	1.77709528612637E-09	9.05829222410984E-10	3.39312534411226E-11	4.96892978757493E-12	6.39995813402789E-11	2.06574307680502E-11
487990	4158090	93.1729965209961	2.73038839671164E-09	4.56049489664828E-10	2.02483817715375E-09	1.02222314285036E-09	4.03047341181296E-11	5.67551604264257E-12	7.63506366483468E-11	2.44586433406375E-11
488190	4158090	112.613998413086	3.04608145063122E-09	5.0219351636752E-10	2.30665881285942E-09	1.15339969638396E-09	4.78724255896733E-11	6.4820879343915E-12	9.10626045646503E-11	2.89606890816216E-11
488390	4158090	129.789001464844	3.39675317697196E-09	5.52540712485859E-10	2.62719546337963E-09	1.30122906621204E-09	5.68563646861712E-11	7.40288849401479E-12	1.08581068431037E-10	3.42924389503006E-11
488590	4158090	132.919998168945	3.7861916553627E-09	6.07417914688905E-10	2.99171304894595E-09	1.46781908847245E-09	6.75192821008091E-11	8.45419193449577E-12	1.29434250247389E-10	4.06062161291211E-11
488790	4158090	137.003005981445	4.21861274392542E-09	6.67172965824451E-10	3.40618743008079E-09	1.65554741404006E-09	8.01719140854484E-11	9.65465059569916E-12	1.54247969186314E-10	4.80820259131467E-11
488990	4158090	139.348999023438	4.69871534164183E-09	7.32175340106566E-10	3.87740064736368E-09	1.86709625160833E-09	9.51815570870789E-11	1.10256335781689E-11	1.83763201253656E-10	5.6932470708863E-11
489190	4158090	142.300994873047	5.23174518232907E-09	8.02817419743247E-10	4.41304877587341E-09	2.10549207662992E-09	1.12982095733567E-10	1.25916296703575E-11	2.18856677380085E-10	6.7408519684611E-11
489390	4158090	143.764007568359	5.82356856449183E-09	8.79516027748828E-10	5.02186422343432E-09	2.37415071257304E-09	1.34085737138467E-10	1.43807118617364E-11	2.60565011196004E-10	7.98062616263917E-11
489590	4158090	147.197006225586	6.48075674374682E-09	9.62714302653345E-10	5.71375313401005E-09	2.67692807778748E-09	1.59096725393468E-10	1.64250748864373E-11	3.10112920282764E-10	9.44747992265648E-11
489790	4158090	154.156005859375	7.21068346849747E-09	1.05288390058818E-09	6.49995100860854E-09	3.01817771100476E-09	1.88727340762471E-10	1.87616531866755E-11	3.68946181194069E-10	1.11825460382537E-10
489990	4158090	165.845993041992	8.02163636158811E-09	1.15052672368356E-09	7.39319767141995E-09	3.40281496907104E-09	2.23816514031516E-10	2.14328077051869E-11	4.38770049506398E-10	1.32342512311121E-10
490190	4158090	184.227005004883	8.92294789915073E-09	1.25617769983023E-09	8.40794202282496E-09	3.83639263900537E-09	2.65351482071818E-10	2.44871299781712E-11	5.21593965952614E-10	1.56595632271776E-10
490390	4158090	194.936996459961	9.92514905092267E-09	1.37040899870526E-09	9.56057941644161E-09	4.32518923389067E-09	3.14492937327441E-10	2.79803870970514E-11	6.19783474366818E-10	1.85254398211904E-10
490590	4158090	202.315994262695	1.10401290358616E-08	1.49383345766295E-09	1.08696720623983E-08	4.87629065989816E-09	3.72604121776707E-10	3.19765772012091E-11	7.36120380696975E-10	2.19105050555423E-10
490790	4158090	219.475006103516	1.22813338803321E-08	1.62710913674555E-09	1.23562434470609E-08	5.4976992977211E-09	4.41284431534832E-10	3.65491357550161E-11	8.73872292414869E-10	2.59069857467063E-10
490990	4158090	227.39599609375	1.36639894086779E-08	1.77094565714793E-09	1.40440955296216E-08	6.19845243829318E-09	5.22408147948038E-10	4.17823465886569E-11	1.03687279541985E-09	3.06229457303616E-10
491190	4158090	237.865997314453	1.52053542792257E-08	1.92610863712339E-09	1.59601623389481E-08	6.98875262535311E-09	6.18168895676922E-10	4.77728602082755E-11	1.2296136121586E-09	3.61848463701493E-10
491390	4158090	239.149993896484	1.69250086069084E-08	2.0934270522505E-09	1.81349049850435E-08	7.88011480373197E-09	7.31130580114257E-10	5.46314780557834E-11	1.45735021439733E-09	4.27404841418664E-10
491590	4158090	238.279006958008	1.8845182068625E-08	2.27380342089822E-09	2.06027519086849E-08	8.8855315886602E-09	8.64285533543852E-10	6.2485225330342E-11	1.72622242421464E-09	5.04623477068439E-10
491790	4158090	236.966003417969	2.09911238164359E-08	2.46822136160197E-09	2.3402587532842E-08	1.00196543044964E-08	1.02112058170638E-09	7.14796039232268E-11	2.0433915777806E-09	5.95514283487868E-10
491990	4158090	237.343994140625	2.33915204571611E-08	2.67775456051981E-09	2.65782938674044E-08	1.12989940198603E-08	1.20569178031327E-09	8.17810638519024E-11	2.41719582818726E-09	7.02415284810289E-10
492190	4158090	239.406005859375	2.60789565721294E-08	2.90358204889874E-09	3.01793130335726E-08	1.27421341639916E-08	1.42270870193177E-09	9.35799783043899E-11	2.8573251972165E-09	8.28041319506935E-10
492390	4158090	254.686996459961	2.90904161058819E-08	3.14699920755711E-09	3.42612277199953E-08	1.43699468693375E-08	1.67762873855035E-09	1.0709379077975E-10	3.3750177244691E-09	9.75538476168239E-10
492590	4158090	272.738006591797	3.24679289347049E-08	3.40943598851362E-09	3.88866421870118E-08	1.62059223197022E-08	1.97676212524821E-09	1.22570568715304E-10	3.98327789244475E-09	1.14854474741647E-09
492790	4158090	291.484985351562	3.62592069731254E-08	3.69247277949609E-09	4.41258988233184E-08	1.82764372776946E-08	2.32738798040553E-09	1.40292875435181E-10	4.69711811304072E-09	1.35125704590361E-09
492990	4158090	304.837005615234	4.0518372662949E-08	3.9978578434929E-09	5.00579183944553E-08	2.06110692227024E-08	2.73788145948846E-09	1.60581963911866E-10	5.53382348238215E-09	1.58850463994416E-09
493190	4158090	314.997009277344	4.53067707310038E-08	4.32753162833537E-09	5.67711133449889E-08	2.32429412273513E-08	3.21785190716371E-09	1.83802493639958E-10	6.51323923240924E-09	1.86582900478089E-09
493390	4158090	334.330993652344	5.06938593926977E-08	4.68364478284707E-09	6.43643653822417E-08	2.62090859792907E-08	3.77829083705045E-09	2.10367225137379E-10	7.65807917397794E-09	2.18956923559928E-09
493590	4158090	339.298004150391	5.67581837864068E-08	5.0685781613914E-09	7.29480639505084E-08	2.95508330272863E-08	4.43172810296966E-09	2.40741927306587E-10	8.99425206103053E-09	2.56695237917133E-09
493790	4158090	339.468994140625	6.3588453742006E-08	5.48498113615908E-09	8.2645199654601E-08	3.33142275590926E-08	5.19239493296539E-09	2.75451057672029E-10	1.05512009853376E-08	3.00618779598589E-09
493990	4158090	343.384002685547	7.12847018168012E-08	5.93579373267439E-09	9.35925011240022E-08	3.75504544771908E-08	6.07638942220883E-09	3.15083042115868E-10	1.23622484836857E-08	3.51656274614197E-09
494190	4158090	340.14599609375	7.99595344724821E-08	6.42427443059173E-09	1.05941601768814E-07	4.23162768721224E-08	7.101839661759E-09	3.60295466953176E-10	1.44649373030339E-08	4.10853675701017E-09
494390	4158090	340.122985839844	8.97394792426028E-08	6.95403676279691E-09	1.1986021708626E-07	4.76744839237575E-08	8.28905826490262E-09	4.11820098551675E-10	1.69013532814787E-08	4.79383111174208E-09
494590	4158090	339.234008789062	1.00766411075321E-07	7.52907309519328E-09	1.35533301578203E-07	5.36943232285329E-08	9.66067925211931E-09	4.70466692529347E-10	1.97184123435011E-08	5.58550791243149E-09
494790	4158090	338.217010498047	1.13199057322108E-07	8.15379200010237E-09	1.5316416055542E-07	6.04519255495382E-08	1.12417673990497E-08	5.37126501512936E-10	2.2968089684994E-08	6.49803355962579E-09
494990	4158090	342.93701171875	1.27214558469512E-07	8.83304898682606E-09	1.72975466451167E-07	6.80306908614642E-08	1.30598857472725E-08	6.12774002917181E-10	2.67075626985927E-08	7.54731800192193E-09
495190	4158090	356.557006835938	1.43010074498392E-07	9.57217453741084E-09	1.95210128840355E-07	7.65216198967978E-08	1.51451052389931E-08	6.98466523999782E-10	3.09992337788793E-08	8.75072052064793E-09
495390	4158090	357.419006347656	1.6080442869529E-07	1.03770076278748E-08	2.20131966551245E-07	8.60235778171613E-08	1.75299372996347E-08	7.9534142321714E-10	3.5910592645491E-08	1.01270110735337E-08
495590	4158090	355.506988525391	1.80839711023694E-07	1.12539059683598E-08	2.48026087265977E-07	9.66434374707403E-08	2.02491659514505E-08	9.04609077158969E-10	4.15138711477743E-08	1.16962734119716E-08
495790	4158090	363.897003173828	2.0338277697245E-07	1.22097664286243E-08	2.79198846283742E-07	1.08496077387193E-07	2.33395548200697E-08	1.02754222958508E-09	4.7885437541538E-08	1.34797362942614E-08
495990	4158090	367.419006347656	2.2872665079902E-07	1.32520238411771E-08	3.13977342074284E-07	1.2170419886046E-07	2.6839400426649E-08	1.16545970135889E-09	5.51048717261059E-08	1.54995157759906E-08
496190	4158090	374.351989746094	2.5719180967867E-07	1.43886438971826E-08	3.52708344855217E-07	1.36397934761256E-07	3.07879020410287E-08	1.31970359676772E-09	6.32536595743969E-08	1.77782515021243E-08
496390	4158090	378.691009521484	2.89127213331108E-07	1.5628107606076E-08	3.9575648269433E-07	1.52714185169181E-07	3.52243180698351E-08	1.49160911952867E-09	7.24134438395915E-08	2.03386197365722E-08
496590	4158090	381.247009277344	3.24910952640388E-07	1.69793669278387E-08	4.4350150517426E-07	1.70795601866877E-07	4.01868805881948E-08	1.68246600520763E-09	8.26637726079831E-08	2.32027067130663E-08
496790	4158090	381.798004150391	3.64950518241175E-07	1.84517939280699E-08	4.96334532023884E-07	1.90789202617015E-07	4.57114447918339E-08	1.89347162187244E-09	9.40792957099926E-08	2.63912291681492E-08
496990	4158090	384.571014404297	4.09682551061029E-07	2.00550635300001E-08	5.54653102209303E-07	2.12844510310259E-07	5.18298540754268E-08	2.12567165513782E-09	1.0672637427632E-07	2.99225898049698E-08
497190	4158090	393.325988769531	4.59572031227299E-07	2.17990209718216E-08	6.18854893123355E-07	2.37111202702834E-07	5.85680199749772E-08	2.37989173508912E-09	1.2065909658887E-07	3.38117683341419E-08
497390	4158090	400.317993164062	5.15110869636982E-07	2.36935425669056E-08	6.89329991339686E-07	2.63736235506168E-07	6.59437307797497E-08	2.65666102491779E-09	1.35914728029328E-07	3.80690562291005E-08
497590	4158090	404.100006103516	5.7681584794944E-07	2.57483581160543E-08	7.66451632981233E-07	2.92860389012068E-07	7.39642239096675E-08	2.95612803958413E-09	1.52508669445029E-07	4.2698655142402E-08
497790	4158090	409.756988525391	6.45225985983381E-07	2.79728119969963E-08	8.50565406684396E-07	3.24614221017033E-07	8.26235839791639E-08	3.27796844295929E-09	1.70429056197103E-07	4.76971739455977E-08
497990	4158090	408.184997558594	7.20899612088535E-07	3.0375620375038E-08	9.41977065420148E-07	3.591135155868E-07	9.19000664963458E-08	3.62129123398813E-09	1.89631200845813E-07	5.30520830345103E-08
498190	4158090	401.093994140625	8.04410898559371E-07	3.29645698337493E-08	1.04093896582534E-06	3.96454199369568E-07	1.01753480165118E-07	3.98454719676101E-09	2.1003215668084E-07	5.87402024104558E-08
498390	4158090	396.14599609375	8.96346869683032E-07	3.57462207876325E-08	1.14763578536815E-06	4.36707000575935E-07	1.12122798793149E-07	4.36544567182948E-09	2.3150575693828E-07	6.47263222813982E-08
498590	4158090	397.140014648438	9.97305778948183E-07	3.8725650882093E-08	1.26217027145572E-06	4.79912145143287E-07	1.22924208116584E-07	4.76088715246106E-09	2.53878555576401E-07	7.096207486485E-08
498790	4158090	411.468994140625	1.10789746365029E-06	4.19062336436918E-08	1.38454980852778E-06	5.26074370543658E-07	1.34049818845009E-07	5.1669197201139E-09	2.76927149706702E-07	7.73851908587717E-08
498990	4158090	425.589996337891	1.2287470060125E-06	4.52894446942657E-08	1.51467509924367E-06	5.7515871975531E-07	1.45367288721E-07	5.57872605735633E-09	3.00377388750252E-07	8.39192797455872E-08
499190	4158090	436.079986572266	1.3605037931359E-06	4.8874870286403E-08	1.65233276508814E-06	6.2708787839432E-07	1.56720590311376E-07	5.99065372651356E-09	3.23905958664508E-07	9.04742730213556E-08
499390	4158090	444.653991699219	1.50385805445897E-06	5.26604031107118E-08	1.79719386270908E-06	6.81741765336108E-07	1.67932124036873E-07	6.39629252462156E-09	3.47144757402909E-07	9.69476437384977E-08
499590	4158090	437.200988769531	1.65956739409126E-06	5.66427119827078E-08	1.94882062299883E-06	7.38960264303309E-07	1.78806312516531E-07	6.78860432908122E-09	3.6968834372788E-07	1.03226481309135E-07
499790	4158090	429.859008789062	1.82849599129743E-06	6.08180609233681E-08	2.10668381287683E-06	7.98550010317476E-07	1.89134716267366E-07	7.16010668758901E-09	3.91104542683911E-07	1.09190444627534E-07
499990	4158090	442.320007324219	2.01166902742297E-06	6.51835703440278E-08	2.27019292960963E-06	8.60296087356533E-07	1.98702588137366E-07	7.5031081236476E-09	4.10948035592319E-07	1.14715546278024E-07
500190	4158090	457.088012695312	2.21034432487131E-06	6.9738929060796E-08	2.43874082063496E-06	9.23979217314055E-07	2.07296639269599E-07	7.80998456740614E-09	4.28776466596138E-07	1.19678635691699E-07
500390	4158090	456.736999511719	2.42610220296561E-06	7.44886334097979E-08	2.61176327163163E-06	9.89398684859383E-07	2.14713648464156E-07	8.07348669088443E-09	4.44168298418886E-07	1.23962369834811E-07
500590	4158090	463.412994384766	2.66095295797656E-06	7.94447272927713E-08	2.78881248624424E-06	1.05640059320359E-06	2.20769412635902E-07	8.28706028475756E-09	4.56741375471614E-07	1.27460381445558E-07
500790	4158090	467.182006835938	2.91747014220235E-06	8.46298967830918E-08	2.96964134740472E-06	1.12491023545766E-06	2.25307436780853E-07	8.44515558950228E-09	4.66170949903883E-07	1.30082296441419E-07
500990	4158090	470.160003662109	3.19890468300448E-06	9.00808030352679E-08	3.15429320605592E-06	1.19496661229174E-06	2.28206722873748E-07	8.54350473570882E-09	4.72205839697833E-07	1.3175823151589E-07
501190	4158090	469.635986328125	3.50930979722595E-06	9.58513674977152E-08	3.34318995194223E-06	1.26675629982069E-06	2.29388036578581E-07	8.57934186741648E-09	4.74681435011521E-07	1.32442412095972E-07
501390	4158090	463.089996337891	3.85369650773433E-06	1.02015837730209E-07	3.53720979133541E-06	1.34064346525148E-06	2.28818132026026E-07	8.55155326161891E-09	4.73528465202484E-07	1.32115612334674E-07
501590	4158090	452.917999267578	4.23813246518566E-06	1.08671305394997E-07	3.73774582648641E-06	1.41719260841617E-06	2.26511565608185E-07	8.46074138639635E-09	4.68776767306398E-07	1.30786203588966E-07
501790	4158090	451.919006347656	4.66982358970387E-06	1.15939346331928E-07	3.94673735658136E-06	1.49718090375002E-06	2.22529938690538E-07	8.30919621730588E-09	4.60553722994654E-07	1.28489717991834E-07
501990	4158090	445.980987548828	5.15715703280696E-06	1.23966589686521E-07	4.16666758988485E-06	1.58159774333068E-06	2.16978634536509E-07	8.10077637099894E-09	4.49077499598828E-07	1.25286965028972E-07
502190	4158090	440.509002685547	5.70969387439195E-06	1.32924054607246E-07	4.40052366533296E-06	1.67162989826615E-06	2.10001334136447E-07	7.84071208879918E-09	4.34645683645284E-07	1.21260866330089E-07
502390	4158090	442.257995605469	6.33916111830551E-06	1.43023236925642E-07	4.65203429810026E-06	1.76875752778384E-06	2.01772774150592E-07	7.53534390580857E-09	4.17620270032688E-07	1.16512274777388E-07
502590	4158090	442.485992431641	7.06130387472798E-06	1.54546694100063E-07	4.92614704718795E-06	1.874945889081E-06	1.9249033698267E-07	7.19182077274488E-09	3.98410226285494E-07	1.11155119438231E-07
502790	4158090	440.795013427734	7.89189602663905E-06	1.67778276199464E-07	5.22774702975438E-06	1.99213858426545E-06	1.82365114245677E-07	6.81778181539428E-09	3.7745296291649E-07	1.05311247791821E-07
502990	4158090	433.957000732422	8.84835407771746E-06	1.83029373094965E-07	5.56204307366736E-06	2.12241363257469E-06	1.71613066562898E-07	6.42103826656886E-09	3.55196006183102E-07	9.91053218657152E-08
503190	4158090	436.441986083984	9.94980818366664E-06	2.00638724815059E-07	5.93449082277898E-06	2.26795562088982E-06	1.60446831861066E-07	6.00927964210165E-09	3.32080013663124E-07	9.26600890177137E-08
503390	4158090	431.157012939453	1.12196279532345E-05	2.21015976451738E-07	6.35121605871124E-06	2.43123626278894E-06	1.49068611738463E-07	5.58981872051028E-09	3.08524024717969E-07	8.60922751132531E-08
503590	4158090	428.924011230469	1.26767544257066E-05	2.44491833085008E-07	6.81631616666506E-06	2.61394525303857E-06	1.37664423653105E-07	5.16938543874807E-09	2.84913542718658E-07	7.95092661382059E-08
503790	4158090	428.606994628906	1.43412471562467E-05	2.71409308651723E-07	7.33365479335E-06	2.81769592116957E-06	1.26399860940727E-07	4.7539747679206E-09	2.6159174357669E-07	7.30066602374878E-08
503990	4158090	413.950988769531	1.62334082954734E-05	3.0210462344062E-07	7.90621480028096E-06	3.04377964946434E-06	1.15417369909183E-07	4.34874897140216E-09	2.38853829694464E-07	6.66666955545509E-08
504190	4158090	401.653991699219	1.83700190894834E-05	3.36858079195348E-07	8.53509937801452E-06	3.2927741781743E-06	1.0483494510424E-07	3.95799124476266E-09	2.16944323530386E-07	6.05574969778019E-08
504390	4158090	398.076995849609	2.07627717603383E-05	3.75856376906537E-07	9.21873062958612E-06	3.56423045161922E-06	9.47460630486691E-08	3.58510152106431E-09	1.96056932034832E-07	5.47330370347845E-08
504590	4158090	398.212005615234	2.34164359027884E-05	4.19159598131034E-07	9.95214591604055E-06	3.85639770588528E-06	8.52206324349299E-08	3.23263023324779E-09	1.76336516449816E-07	4.92336841409294E-08
504790	4158090	392.764007568359	2.63224504325728E-05	4.66592665258415E-07	1.07254359914826E-05	4.16559069148233E-06	7.63067167339538E-08	2.90234085676666E-09	1.57882662015707E-07	4.40871971434397E-08
504990	4158090	393.305999755859	2.94071240968363E-05	5.16839165839819E-07	1.15116284412066E-05	4.48123970066373E-06	6.80327880999402E-08	2.59529047814171E-09	1.40754350506826E-07	3.9310026168411E-08
505190	4158090	396.338012695312	3.25463862768575E-05	5.67714334623869E-07	1.22719724999705E-05	4.78797126888821E-06	6.04102944704739E-08	2.31192137451389E-09	1.24975282585313E-07	3.49087942368074E-08
505390	4158090	388.904998779297	3.54438207563667E-05	6.14134297159357E-07	1.29333843945541E-05	5.05617369229405E-06	5.34363532883773E-08	2.05215742348239E-09	1.10539462073748E-07	3.08818520300524E-08
505590	4158090	387.954986572266	3.69362163167397E-05	6.37085403418788E-07	1.32821066861607E-05	5.1965829695649E-06	4.70964212162196E-08	1.81549975035093E-09	9.74167302635696E-08	2.72208188181363E-08
505790	4158090	379.156005859375	3.49115200977645E-05	6.02814266569056E-07	1.29775064259888E-05	5.0647402459359E-06	4.13668267356305E-08	1.6011175712025E-09	8.55580157509046E-08	2.39120442639463E-08
505990	4158090	364.962005615234	3.16166768938107E-05	5.47302352320209E-07	1.23799846561371E-05	4.81366132199826E-06	3.62170874307756E-08	1.40793144108383E-09	7.4900137673694E-08	2.09379459709885E-08
506190	4158090	363.730987548828	2.827283682084E-05	4.90537110132516E-07	1.17078819093118E-05	4.53488765166431E-06	3.16119642143721E-08	1.23468707422843E-09	6.53700635047258E-08	1.82781951611373E-08
506390	4158090	348.494995117188	2.51300657112697E-05	4.36874571066865E-07	1.10188015552398E-05	4.25198303377807E-06	2.75132300027911E-08	1.08001878235612E-09	5.68885748871901E-08	1.59107374213273E-08
506590	4158090	354.885009765625	2.22645314920625E-05	3.87701635836155E-07	1.0333009050128E-05	3.97314444661759E-06	2.38811503425922E-08	9.42503210016974E-10	4.93733357572648E-08	1.38126474885742E-08
506790	4158090	353.846984863281	1.96899842495486E-05	3.43315195684951E-07	9.65701812958129E-06	3.70091142065327E-06	2.06756870499319E-08	8.20702687072967E-10	4.27413865894749E-08	1.19608239078049E-08
506990	4158090	348.743988037109	1.73942813109754E-05	3.03549845158579E-07	8.99262232412164E-06	3.43582509719879E-06	1.78574464487099E-08	7.13199593307567E-10	3.69111090328155E-08	1.03325363509061E-08
507190	4158090	344.665008544922	1.53551921819736E-05	2.68061763196379E-07	8.34084862596767E-06	3.17803585005929E-06	1.53883993608204E-08	6.18622713799284E-10	3.18037172495051E-08	8.90584127999361E-09
507390	4158090	345.256011962891	1.3547710495356E-05	2.36456279658636E-07	7.70344215995111E-06	2.92792039898186E-06	1.32324024693232E-08	5.35665971702735E-10	2.73443379462611E-08	7.65988271183646E-09
507590	4158090	345.822998046875	1.1947309777162E-05	2.0834418981138E-07	7.08314989855857E-06	2.6862201883758E-06	1.13555518382602E-08	4.63101401919003E-10	2.34627423002531E-08	6.57509624749967E-09
507790	4158090	345.290985107422	1.05277468211645E-05	1.83308615965154E-07	6.4829159737067E-06	2.45372996678194E-06	9.72639799220171E-09	3.99787686583584E-10	2.00937905273625E-08	5.63333348041514E-09
507990	4158090	336.121002197266	9.26811419311137E-06	1.6101662608614E-07	5.90641164190357E-06	2.23156039111133E-06	8.31604897479321E-09	3.44673956234345E-10	1.71776448927113E-08	4.81792139331849E-09
508190	4158090	339.196990966797	8.15293287792087E-06	1.4122030878743E-07	5.35758924045645E-06	2.02097785918597E-06	7.09818603178131E-09	2.96800607578514E-10	1.46598015501278E-08	4.11367141989518E-09
508390	4158090	339.820007324219	7.1674244311243E-06	1.23681586772992E-07	4.83964495819485E-06	1.82298230507818E-06	6.04901297375239E-09	2.55297848866492E-10	1.24909848991397E-08	3.50685030307422E-09
508590	4158090	339.462005615234	6.29781515145987E-06	1.08176721439936E-07	4.35488641554288E-06	1.63826233503282E-06	5.14715697656028E-09	2.19382400298508E-10	1.06269414265323E-08	2.98512288742055E-09
508790	4158090	337.735992431641	5.53144196318433E-06	9.4497878759179E-08	3.90469962435477E-06	1.46718432256753E-06	4.37353575410825E-09	1.88352962873222E-10	9.02816393173183E-09	2.53747550729079E-09
508990	4158090	326.486999511719	4.85676349339256E-06	8.24533705007048E-08	3.48959846330227E-06	1.30981041420399E-06	3.7112031226252E-09	1.61584750563529E-10	7.65957119181395E-09	2.15412684559669E-09
509190	4158090	328.704986572266	4.26332686292174E-06	7.18673305171359E-08	3.10932961842587E-06	1.16593617667157E-06	3.14518273767257E-09	1.38523737775199E-10	6.49016302069205E-09	1.82643204476987E-09
509390	4158090	327.523986816406	3.74171388169735E-06	6.2579147829075E-08	2.76300655461271E-06	1.03513855818051E-06	2.6622974134759E-09	1.18680800035026E-10	5.49266616745913E-09	1.54678430492852E-09
509590	4158090	324.627990722656	3.28347745275422E-06	5.44427774130168E-08	2.44925152649639E-06	9.16826670618972E-07	2.25099949136389E-09	1.01625689876818E-10	4.64318263606514E-09	1.30851700440286E-09
509790	4158090	329.27099609375	2.88107319978413E-06	4.73259815287323E-08	2.16633123348532E-06	8.10290234806925E-07	1.90120649523137E-09	8.69812253362393E-11	3.92084897545238E-09	1.10580889169153E-09
509990	4158090	331.414001464844	2.52778893085561E-06	4.11095179185784E-08	1.91227762911065E-06	7.1474263732992E-07	1.60414492402773E-09	7.44177665691166E-11	3.30751247088449E-09	9.33593980330785E-10
510190	4158090	333.023010253906	2.21767364915308E-06	3.56862918675093E-08	1.68498995715687E-06	6.29357193253581E-07	1.3522040167087E-09	6.36480423862272E-11	2.78742803378301E-09	7.87477201152967E-10
510390	4158090	338.651000976562	1.94546746516731E-06	3.09604808843787E-08	1.48231717059074E-06	5.5329631582767E-07	1.13880053388132E-09	5.44222870254996E-11	2.34697803225304E-09	6.63656378609117E-10
510590	4158090	352.945007324219	1.7065335893773E-06	2.68466556088482E-08	1.30212181963941E-06	4.85733999978914E-07	9.58255138997286E-10	4.65238870948025E-11	1.97441607897981E-09	5.58850948208279E-10
510790	4158090	360.221984863281	1.49679339215827E-06	2.32689032955993E-08	1.14232748734942E-06	4.25872373121832E-07	8.05680305686674E-10	3.97653643159877E-11	1.65963479891696E-09	4.70237292927764E-10
510990	4158090	331.467987060547	1.31266532459371E-06	2.01599725453818E-08	1.00095229059346E-06	3.72953233285285E-07	6.76879502900194E-10	3.39847641196087E-11	1.39395697720433E-09	3.95390590732997E-10
511190	4158090	347.390014648438	1.15100826324171E-06	1.74604501432155E-08	8.76130987732602E-07	3.26265497962024E-07	5.68257128805367E-10	2.9042403849773E-11	1.1699490096456E-09	3.3223285286086E-10
511390	4158090	336.298004150391	1.00906961661542E-06	1.5117980688395E-08	7.66128051326099E-07	2.85149421072177E-07	4.76738533928903E-10	2.48180064454299E-11	9.81255243574072E-10	2.78986796606347E-10
511590	4158090	319.233001708984	8.84438325028437E-07	1.30865336613071E-08	6.69343782824196E-07	2.4899833008282E-07	3.99699365192575E-10	2.12081280608959E-11	8.22451667563621E-10	2.3413507572129E-10
511790	4158090	270.742004394531	7.75002708422784E-07	1.13257234109767E-08	5.84315213471277E-07	2.17258515894711E-07	3.34903474550043E-10	1.81239264976327E-11	6.88917333613933E-10	1.96384473334244E-10
511990	4158090	233.835006713867	6.78912983928938E-07	9.80018335970321E-09	5.0971323800918E-07	1.89427798101289E-07	2.80448555794439E-10	1.54891884353902E-11	5.76721802094757E-10	1.64634542808933E-10
512190	4158090	225.475997924805	5.94548162864389E-07	8.47899415654369E-09	4.44337133895877E-07	1.6505318125155E-07	2.34718731004964E-10	1.3238591962931E-11	4.8252699252412E-10	1.37950249603285E-10
512390	4158090	221.520004272461	5.20486995832665E-07	7.33516603415274E-09	3.8710736458986E-07	1.43727926428409E-07	1.96343360226326E-10	1.13162053061155E-11	4.03501923033593E-10	1.15538211629612E-10
512590	4158090	201.893997192383	4.55482577388381E-07	6.34517094663659E-09	3.37057355315147E-07	1.25088283679464E-07	1.64161355382049E-10	9.67416602554276E-12	3.37248860641288E-10	9.67261044503635E-11
512790	4158090	194.184005737305	3.98440228893612E-07	5.48852315060773E-09	2.93324765741227E-07	1.08810073674172E-07	1.37190354357145E-10	8.2715330090352E-12	2.8173953436282E-10	8.09448674683918E-11
512990	4158090	198.574996948242	3.48398268321134E-07	4.74740482344993E-09	2.55142638524903E-07	9.46052531653934E-08	1.14600173294477E-10	7.07331144319404E-12	2.35260191513777E-10	6.77133871444105E-11
513190	4158090	202.029998779297	3.04511322004707E-07	4.10633511623747E-09	2.21830710271978E-07	8.22185666631644E-08	9.56900129336239E-11	6.04961329535984E-12	1.96364451186053E-10	5.6625351751156E-11
513390	4158090	192.016998291016	2.66035839412212E-07	3.55187454990882E-09	1.92787047032114E-07	7.14243376861301E-08	7.98688991073924E-11	5.17491559488524E-12	1.63832848649177E-10	4.733795599016E-11
513590	4158090	151.692001342773	2.32317518397285E-07	3.07236418455182E-09	1.67480141712946E-07	6.20234488455791E-08	6.66389519707534E-11	4.42742214883442E-12	1.36638236220686E-10	3.956223786696E-11
513790	4158090	110.975997924805	2.02780378259816E-07	2.6576968621246E-09	1.45441543608971E-07	5.38405344118827E-08	5.55811043661264E-11	3.78853178852795E-12	1.13916244080763E-10	3.30548384351067E-11
513990	4158090	86.0279998779297	1.76917250238276E-07	2.29911555499939E-09	1.2625905618428E-07	4.67213952683737E-08	4.6342927480698E-11	3.24236560417292E-12	9.49401177072742E-11	2.76109678978137E-11
514190	4158090	58.2400016784668	1.54281487670396E-07	1.98903728551679E-09	1.09570511592312E-07	4.05306383718693E-08	3.86282826986234E-11	2.77537888956338E-12	7.90993243832614E-11	2.30584355176287E-11
514390	4158090	31.0949993133545	1.34479724868987E-07	1.72089851122424E-09	9.50581127048929E-08	3.5149534795791E-08	3.21885192872278E-11	2.37601660440917E-12	6.58813592887735E-11	1.92525617384874E-11
514590	4158090	0	1.17165539770095E-07	1.48902010852141E-09	8.24433215166142E-08	3.04740875619426E-08	2.68150085543007E-11	2.03441972137422E-12	5.48563164055641E-11	1.60718623985252E-11
514790	4158090	0	1.0203389686661E-07	1.28848993507648E-09	7.1482264124882E-08	2.64132972358349E-08	2.23328224155516E-11	1.74218025153925E-12	4.56638234264228E-11	1.34143969039994E-11
482590	4158290	226.751998901367	1.30593297199663E-10	2.8855341719333E-11	5.93425331916719E-11	3.98781399468479E-11	4.42378235407461E-13	1.66028582264356E-13	6.6416392694504E-13	2.98466669978284E-13
482790	4158290	243.677001953125	1.4751903524834E-10	3.23406991075001E-11	6.8065809265289E-11	4.52558333672408E-11	5.22754551445715E-13	1.91061516641807E-13	7.95249908703365E-13	3.51691603554717E-13
482990	4158290	263.273010253906	1.66595050674573E-10	3.62315702426574E-11	7.80521914172466E-11	5.13487036034979E-11	6.17977021728884E-13	2.19781866201401E-13	9.52188927573671E-13	4.14495609261044E-13
483190	4158290	258.282012939453	1.88085213549581E-10	4.05727106680371E-11	8.94816387691205E-11	5.82503067957824E-11	7.30831556902908E-13	2.52720786305568E-13	1.14007934433959E-12	4.886237217072E-13
483390	4158290	254.076995849609	2.12284068483607E-10	4.54134595394059E-11	1.0255933702602E-10	6.60662313176776E-11	8.64634363624475E-13	2.90484879614357E-13	1.3650257486746E-12	5.76143794327027E-13
483590	4158290	268.164001464844	2.39520107885378E-10	5.08080619530312E-11	1.1751917484419E-10	7.49155577952275E-11	1.02333367186742E-12	3.33765609010929E-13	1.63433771212824E-12	6.7950623036321E-13
483790	4158290	289.843994140625	2.70159348996206E-10	5.68161187584947E-11	1.34627632118651E-10	8.49325493012113E-11	1.2116283853628E-12	3.83351351294887E-13	1.95676117681813E-12	8.01614326385323E-13
483990	4158290	282.140014648438	3.0460845461924E-10	6.35030603032395E-11	1.54186769899046E-10	9.62680328700812E-11	1.4350425221556E-12	4.40139261711509E-13	2.34261584122828E-12	9.45869496975192E-13
484190	4158290	316.447998046875	3.4331999090264E-10	7.09406618072199E-11	1.76540964822413E-10	1.09092158064439E-10	1.70016292106846E-12	5.05152697784492E-13	2.80426969150786E-12	1.11631017501391E-12
484390	4158290	328.696990966797	3.86797159696359E-10	7.92075510962435E-11	2.02082713609216E-10	1.23596815254647E-10	2.01484550161084E-12	5.79559233308258E-13	3.35654536918757E-12	1.31773303209195E-12
484590	4158290	327.450012207031	4.3559869531442E-10	8.83897438579178E-11	2.31258685629148E-10	1.39998160955564E-10	2.38843320159623E-12	6.64690136422186E-13	4.01714778936646E-12	1.55582092149299E-12
484790	4158290	320.329010009766	4.90344445293421E-10	9.85810732705982E-11	2.6457706982634E-10	1.58539542288904E-10	2.83203656832103E-12	7.62060945822261E-13	4.80722009397174E-12	1.83730573109034E-12
484990	4158290	312.079010009766	5.51721534433387E-10	1.09883890729992E-10	3.02615947873039E-10	1.79494965105963E-10	3.35886899703314E-12	8.73399412797094E-13	5.75200679999159E-12	2.17016513311797E-12
485190	4158290	290.325988769531	6.20491105603617E-10	1.22409683257624E-10	3.46032772047907E-10	2.03172907118648E-10	3.98464391437816E-12	1.00067457612214E-12	6.88164291526583E-12	2.5638536401986E-12
485390	4158290	269.326995849609	6.974956767504E-10	1.36279695909797E-10	3.95575121996204E-10	2.29920595395489E-10	4.72804670753372E-12	1.14613032506585E-12	8.23209337515554E-12	3.02957690414807E-12
485590	4158290	250.033004760742	7.83667235122417E-10	1.51625629304175E-10	4.52092912476317E-10	2.6012885518069E-10	5.61129588058284E-12	1.31232479314E-12	9.84627098993524E-12	3.58061773494735E-12
485790	4158290	236.054000854492	8.80036058026853E-10	1.68590250636641E-10	5.16552244298355E-10	2.94237495856711E-10	6.66080758384921E-12	1.50217338936633E-12	1.17753661923552E-11	4.23272107488594E-12
485990	4158290	194.024993896484	9.87740443781348E-10	1.87328057324649E-10	5.90051123214308E-10	3.32741404176186E-10	7.90798476197152E-12	1.71899865544924E-12	1.40804281436098E-11	5.00455078211225E-12
486190	4158290	150.195999145508	1.10803742660834E-09	2.08005935074804E-10	6.73837298549048E-10	3.76197398300224E-10	9.39015298223573E-12	1.96658697092427E-12	1.6834243866661E-11	5.91823064151471E-12
486390	4158290	157.895004272461	1.24231470703013E-09	2.30803966246831E-10	7.69328511346003E-10	4.25232046931341E-10	1.11516721148587E-11	2.24925600643933E-12	2.01235706329837E-11	6.99998714357947E-12
486590	4158290	128.436004638672	1.39210382150116E-09	2.55916162902742E-10	8.78135474540662E-10	4.8055042537815E-10	1.32452526559405E-11	2.57193037668256E-12	2.40517865981371E-11	8.28090943063457E-12
486790	4158290	134.160003662109	1.55909478659813E-09	2.83551207036466E-10	1.00208797346127E-09	5.42946001393806E-10	1.57335152192251E-11	2.94022846095592E-12	2.8742037049565E-11	9.79784914910892E-12
486990	4158290	125.480003356934	1.74515249924068E-09	3.13933321380961E-10	1.14326453241154E-09	6.13311890550077E-10	1.86908390078626E-11	3.36056472834043E-12	3.43409676766771E-11	1.15944876849595E-11
487190	4158290	108.799003601074	1.95233487324573E-09	3.47302686854129E-10	1.30402591700692E-09	6.92653204427862E-10	2.22055414698221E-11	3.84025627247904E-12	4.10231424308629E-11	1.37225884111621E-11
487390	4158290	91.9769973754883	2.18291347272673E-09	3.83916173574162E-10	1.48705338826947E-09	7.82101313056153E-10	2.63824621322214E-11	4.38765236900339E-12	4.89962824575326E-11	1.62434840365905E-11
487590	4158290	77.4079971313477	2.43939681948151E-09	4.2404845147058E-10	1.69539196076344E-09	8.82930154854855E-10	3.13460235695046E-11	5.0122926036944E-12	5.85074749115365E-11	1.9229842676935E-11
487790	4158290	82.3300018310547	2.72455667263222E-09	4.67992643744648E-10	1.93249958939266E-09	9.96574391664168E-10	3.72438382521644E-11	5.72507653779355E-12	6.98505098204022E-11	2.27677421633212E-11
487990	4158290	85.9710006713867	3.04145794596699E-09	5.16061126693181E-10	2.20230298526195E-09	1.12465004788184E-09	4.42509687341986E-11	6.53846193989581E-12	8.33745557325983E-11	2.69591210998241E-11
488190	4158290	124.049003601074	3.39349283385085E-09	5.68586380174448E-10	2.5092609538935E-09	1.26897789452223E-09	5.25749531487338E-11	7.46669320940777E-12	9.94944078130606E-11	3.19246699559429E-11
488390	4158290	133.735000610352	3.78442004083574E-09	6.25922566435582E-10	2.85843632037718E-09	1.43161039606176E-09	6.2461734706557E-11	8.52608151665023E-12	1.18702584869111E-10	3.78072514790414E-11
488590	4158290	136.102005004883	4.21840919581922E-09	6.88445239861041E-10	3.25557734448005E-09	1.61486088236484E-09	7.42026250257935E-11	9.73527656259273E-12	1.41583586304116E-10	4.47758889183059E-11
488790	4158290	139.177001953125	4.70009232900975E-09	7.56552414157511E-10	3.70721018168685E-09	1.82133757291639E-09	8.81425093432052E-11	1.11156126901481E-11	1.68830690715075E-10	5.30304842760046E-11
488990	4158290	144.680999755859	5.23462342529041E-09	8.30666872645174E-10	4.22074377462811E-09	2.0539828793596E-09	1.04689500665435E-10	1.26915392360738E-11	2.01265725985058E-10	6.2807388077617E-11
489190	4158290	148.460006713867	5.8277465841516E-09	9.11236995933928E-10	4.80458856136979E-09	2.31611674080853E-09	1.24326256172164E-10	1.44910689903301E-11	2.3986229980996E-10	7.43859020032778E-11
489390	4158290	150.09700012207	6.48587482095215E-09	9.98738321733185E-10	5.46829095392113E-09	2.61148611454188E-09	1.47623251883494E-10	1.65463097905019E-11	2.85773071256676E-10	8.80959164391448E-11
489590	4158290	159.054000854492	7.21618114594784E-09	1.093675419784E-09	6.22268565697357E-09	2.94432110145245E-09	1.75254329146798E-10	1.88940776340186E-11	3.4036172156758E-10	1.04326856671229E-10
489790	4158290	162.843994140625	8.02670412704866E-09	1.19658447884345E-09	7.08006818287548E-09	3.31939880997168E-09	2.08014883876347E-10	2.15766123889476E-11	4.05240379184498E-10	1.23538153831824E-10
489990	4158290	188.516006469727	8.92646781052231E-09	1.30803499950471E-09	8.05438854644466E-09	3.74211428448671E-09	2.46843071783646E-10	2.46423666990897E-11	4.82313359197475E-10	1.46271447582781E-10
490190	4158290	212.078002929688	9.92562128644147E-09	1.42863252943644E-09	9.16147105728807E-09	4.21856151170876E-09	2.92844542577029E-10	2.81469282020185E-11	5.73828199290222E-10	1.73164825673668E-10
490390	4158290	208.440994262695	1.10355996615711E-08	1.55902266929854E-09	1.04192618570701E-08	4.75562524511168E-09	3.47321238705205E-10	3.21541002229685E-11	6.82435095387298E-10	2.04969412021326E-10
490590	4158290	204.212997436523	1.22693086173545E-08	1.6998955699531E-09	1.18481072051946E-08	5.36108423131296E-09	4.1180483520846E-10	3.67371360635354E-11	8.11255984140552E-10	2.42568631132899E-10
490790	4158290	213.375	1.36413400679817E-08	1.85199063127026E-09	1.34710789604926E-08	6.04373158427004E-09	4.88095467127293E-10	4.19801320169482E-11	9.63964655133739E-10	2.87000520121774E-10
490990	4158290	229.88200378418	1.51682246432532E-08	2.01610281621837E-09	1.53143536343865E-08	6.81351551152947E-09	5.78306509443912E-10	4.79796366984323E-11	1.14487943239836E-09	3.39483539748178E-10
491190	4158290	243.429000854492	1.68686909565042E-08	2.19309009264449E-09	1.74075533578997E-08	7.68166702495798E-09	6.84916222211236E-10	5.48465282228281E-11	1.35907011668092E-09	4.01446371819535E-10
491390	4158290	249.375	1.87639864405377E-08	2.38387681021977E-09	1.97842064490541E-08	8.66086817800773E-09	8.10827043037419E-10	6.27079478113512E-11	1.61248098981634E-09	4.74562026309592E-10
491590	4158290	247.442001342773	2.08782436381992E-08	2.58946852883867E-09	2.24822512212927E-08	9.7654432273112E-09	9.59433671830626E-10	7.17098412428726E-11	1.9120719085286E-09	5.60787202034146E-10
491790	4158290	246.319000244141	2.32388887302658E-08	2.81095888812945E-09	2.5544588123929E-08	1.10115621245391E-08	1.13470069062871E-09	8.20195383224755E-11	2.2659794762058E-09	6.62407010676911E-10
491990	4158290	239.85400390625	2.58771049561211E-08	3.04954270686808E-09	2.90196927538227E-08	1.24174699461621E-08	1.34125092542285E-09	9.38288473189298E-11	2.68370048319249E-09	7.82085996669519E-10
492190	4158290	243.432998657227	2.88283560057038E-08	3.30652708313745E-09	3.29622966240899E-08	1.40037394742625E-08	1.58446540334272E-09	1.0735732323489E-10	3.17629967898499E-09	9.22925750617836E-10
492390	4158290	251.244995117188	3.21329765473729E-08	3.5833503427835E-09	3.74341403843894E-08	1.57935549269335E-08	1.87059608545021E-09	1.22856231645459E-10	3.7566440527379E-09	1.08853007792456E-09
492590	4158290	270.334014892578	3.583683362505E-08	3.88159790263815E-09	4.25048021340188E-08	1.78130207887626E-08	2.20689206595033E-09	1.40612744884676E-10	4.43966533620506E-09	1.28307783779759E-09
492790	4158290	312.180999755859	3.99920482003727E-08	4.20302259269911E-09	4.82525483849057E-08	2.00914816589469E-08	2.60174007181739E-09	1.6095469820823E-10	5.24265229722999E-09	1.51140411004477E-09
492990	4158290	317.359985351562	4.46577694140384E-08	4.54956133992139E-09	5.47651770778311E-08	2.26618368968426E-08	3.06481958504987E-09	1.84255664379425E-10	6.1855737240454E-09	1.77908975142514E-09
493190	4158290	325.342010498047	4.99011899023484E-08	4.9233663748649E-09	6.21413745570834E-08	2.55610499122511E-08	3.60727290606832E-09	2.10940746567086E-10	7.29143223468493E-09	2.09255967102782E-09
493390	4158290	331.069000244141	5.57985192134308E-08	5.32682791119258E-09	7.04917563663545E-08	2.88305379614327E-08	4.24188923407273E-09	2.4149258034787E-10	8.58664782524088E-09	2.45918916192967E-09
493590	4158290	336.035003662109	6.2436084739537E-08	5.76259517937416E-09	7.99400815285765E-08	3.25166234445678E-08	4.98330120009874E-09	2.76457445977515E-10	1.01014685315301E-08	2.88741751884051E-09
493790	4158290	340.408996582031	6.99115598944245E-08	6.23361529897455E-09	9.06245558841859E-08	3.6671028733955E-08	5.84819289318798E-09	3.16452290424899E-10	1.18704035702348E-08	3.38686829770052E-09
493990	4158290	348.381988525391	7.83352931170383E-08	6.74316964375687E-09	1.02699200648727E-07	4.13513929064863E-08	6.85551498570211E-09	3.6217200321647E-10	1.39326715814029E-08	3.96847377470759E-09
494190	4158290	348.921997070312	8.78317442014767E-08	7.2948994563478E-09	1.16335271243194E-07	4.66217997100293E-08	8.02670140909922E-09	4.14396112761163E-10	1.63326532197368E-08	4.64460013521443E-09
494390	4158290	347.635986328125	9.85410409103861E-08	7.89285124165843E-09	1.31722708490133E-07	5.25533298547357E-08	9.3858811533585E-09	4.73995770463372E-10	1.9120333379049E-08	5.4291701192239E-09
494590	4158290	351.93798828125	1.10620639206019E-07	8.54151403640409E-09	1.49071590392267E-07	5.92246082980647E-08	1.09600750592603E-08	5.41939752482522E-10	2.23517128890871E-08	6.33777683292165E-09
494790	4158290	355.298004150391	1.24247069262221E-07	9.24585024304931E-09	1.68613551077961E-07	6.67223355530638E-08	1.27793654236815E-08	6.19299404236139E-10	2.60891639945909E-08	7.38778184445623E-09
494990	4158290	354.553985595703	1.39617772251635E-07	1.00113443591024E-08	1.90603123846889E-07	7.51418030674749E-08	1.48770230102379E-08	7.07252705407702E-10	3.04016970464514E-08	8.59838903952665E-09
495190	4158290	357.058990478516	1.56952994370196E-07	1.08440360041866E-08	2.15318941467612E-07	8.45873470507338E-08	1.72895711402042E-08	8.07085506788444E-10	3.53650971773499E-08	9.99068184954575E-09
495390	4158290	370.358001708984	1.76497713335425E-07	1.1750562243855E-08	2.43064725860776E-07	9.51727322810961E-08	2.00567639011295E-08	9.20190230323029E-10	4.106188195609E-08	1.15876110438818E-08
495590	4158290	379.643005371094	1.98523558588319E-07	1.27381781883893E-08	2.74169987099943E-07	1.07021417151491E-07	2.32214493010738E-08	1.04805981211925E-09	4.75810213593343E-08	1.34139158666878E-08
495790	4158290	374.024993896484	2.23330686859272E-07	1.38147848304321E-08	3.08990323234607E-07	1.20266679373648E-07	2.68292856545481E-08	1.19227693502449E-09	5.50173524837839E-08	1.54959605949936E-08
495990	4158290	379.893005371094	2.51249435537529E-07	1.49889370667322E-08	3.47907115993045E-07	1.35051511105601E-07	3.0928274424507E-08	1.35449713818062E-09	6.34706128019182E-08	1.78614652321056E-08
496190	4158290	386.558013916016	2.82641820217011E-07	1.62698354949152E-08	3.91326584355503E-07	1.51528272094572E-07	3.55680692086735E-08	1.53642364861359E-09	7.30440088633028E-08	2.05391066711039E-08
496390	4158290	391.536010742188	3.17902765474445E-07	1.76673141966553E-08	4.39678014315384E-07	1.69858043134241E-07	4.07990193312154E-08	1.73977309237791E-09	8.38422336456144E-08	2.35579666448027E-08
496590	4158290	395.980010986328	3.5746096144524E-07	1.91918021564786E-08	4.93410985493913E-07	1.90209600850248E-07	4.66709065641811E-08	1.9662304913892E-09	9.59688465110698E-08	2.69468024262334E-08
496790	4158290	401.680999755859	4.01779098923713E-07	2.0854262333814E-08	5.52991291842013E-07	2.12757907199895E-07	5.32313380668159E-08	2.21739318277012E-09	1.0952293765246E-07	3.07331192547358E-08
496990	4158290	406.52099609375	4.51353466096963E-07	2.26660770389397E-08	6.18895436323229E-07	2.37682050298957E-07	6.05237634403153E-08	2.49470002958286E-09	1.24595014223801E-07	3.49420251305083E-08
497190	4158290	408.825988769531	5.06712738948486E-07	2.46388810202578E-08	6.91603462089913E-07	2.65162551833715E-07	6.85851003736183E-08	2.79934608288532E-09	1.41262074803742E-07	3.95948592323633E-08
497390	4158290	410.912994384766	5.68415885202646E-07	2.67843806417449E-08	7.71589932055796E-07	2.95377997804989E-07	7.74429753615524E-08	3.13218540398847E-09	1.59581881776502E-07	4.47075984958179E-08
497590	4158290	411.93798828125	6.37049055101321E-07	2.91141468456684E-08	8.59312897257248E-07	3.28500927170352E-07	8.71126125597419E-08	3.49362408622168E-09	1.79586498881085E-07	5.02890617206112E-08
497790	4158290	422.001007080078	7.13221426558894E-07	3.16393136823294E-08	9.5520073765918E-07	3.64692892749792E-07	9.75934337240782E-08	3.88349968250664E-09	2.01275233863821E-07	5.63389456061701E-08
497990	4158290	417.700988769531	7.97560136745372E-07	3.43702434402201E-08	1.05963692631588E-06	4.0409875184839E-07	1.08865486258986E-07	4.30095575781816E-09	2.24607221988065E-07	6.2845761768682E-08
498190	4158290	417.013000488281	8.90704556140759E-07	3.73161659775176E-08	1.17294289112203E-06	4.46840254310716E-07	1.20885861994181E-07	4.74431646359927E-09	2.49493989185286E-07	6.97847683643035E-08
498390	4158290	417.294006347656	9.93299750802003E-07	4.04847353665301E-08	1.29535913774629E-06	4.93008950588743E-07	1.33585324088834E-07	5.21096871557324E-09	2.75792446149749E-07	7.71160218151119E-08
498590	4158290	412.722991943359	1.10599054287913E-06	4.38815972561989E-08	1.42702560691419E-06	5.42658830613255E-07	1.46865412295919E-07	5.69726173210913E-09	3.0329887399284E-07	8.47827047813458E-08
498790	4158290	431.046997070312	1.22941757265244E-06	4.75100373085698E-08	1.56796245805108E-06	5.95799168424352E-07	1.60596341227488E-07	6.19843535680007E-09	3.31744554163269E-07	9.2709912219385E-08
498990	4158290	441.384002685547	1.36421606278779E-06	5.13706054714766E-08	1.71805245641221E-06	6.52387929707225E-07	1.74616032494792E-07	6.70858601770564E-09	3.60793752125326E-07	1.00804090565951E-07
499190	4158290	439.174011230469	1.51101982513199E-06	5.54609452522195E-08	1.87702719375639E-06	7.12326693247687E-07	1.88730625925328E-07	7.22068872340878E-09	3.90044766979494E-07	1.08953332818774E-07
499390	4158290	452.209991455078	1.67047339580317E-06	5.97758268338092E-08	2.04445983680983E-06	7.75458057238256E-07	2.02716776005442E-07	7.72668137101714E-09	4.19034685330962E-07	1.17028703743977E-07
499590	4158290	455.914001464844	1.8432555950151E-06	6.43075060060721E-08	2.21976752705686E-06	8.41566735031868E-07	2.16325962830402E-07	8.21762085913208E-09	4.47248314392927E-07	1.24886728404966E-07
499790	4158290	448.131988525391	2.03011829404631E-06	6.90465017795129E-08	2.40222691435184E-06	9.10385655762413E-07	2.29290919948794E-07	8.68391369785263E-09	4.74131507576331E-07	1.32373102659066E-07
499990	4158290	456.713989257812	2.23194427940109E-06	7.39829390168218E-08	2.59100629443127E-06	9.81608415010337E-07	2.41334112615814E-07	9.11562034337374E-09	4.99108743348138E-07	1.39327588059322E-07
500190	4158290	460.722991943359	2.44982760367705E-06	7.91085023134076E-08	2.78521723229157E-06	1.05490914449506E-06	2.52177993611255E-07	9.50282075121826E-09	5.21604395053036E-07	1.45589932549638E-07
500390	4158290	461.265014648438	2.68517867105191E-06	8.4419096868561E-08	2.98398729039419E-06	1.12997044599397E-06	2.61556552489108E-07	9.83602599048449E-09	5.41066684853397E-07	1.51006538263479E-07
500590	4158290	457.341003417969	2.93985423806042E-06	8.99182453132187E-08	3.18655335595436E-06	1.20651922567748E-06	2.69227473219118E-07	1.01066135080419E-08	5.56992898306759E-07	1.55437481692875E-07
500790	4158290	472.316009521484	3.21631540992355E-06	9.56210429389529E-08	3.39237213883649E-06	1.28436907875062E-06	2.74984055265271E-07	1.03072520746164E-08	5.68954111753327E-07	1.5876339681364E-07
500990	4158290	475.572998046875	3.51780007425695E-06	1.01558492058903E-07	3.60124115237324E-06	1.36346669779813E-06	2.78665979253984E-07	1.04322839750502E-08	5.76617527759484E-07	1.6089169117615E-07
501190	4158290	479.231994628906	3.84845626448951E-06	1.07781906426257E-07	3.81342033687281E-06	1.44393855817155E-06	2.80168020920262E-07	1.04780325764925E-08	5.79764557729851E-07	1.6176157704775E-07
501390	4158290	470.320007324219	4.21355299790834E-06	1.1436706782558E-07	4.02974224641697E-06	1.52613332057926E-06	2.79445948106987E-07	1.04430117065549E-08	5.78303058982119E-07	1.61347477054568E-07
501590	4158290	455.235992431641	4.61962134513024E-06	1.21417701283468E-07	4.25169810034697E-06	1.61065509365114E-06	2.76519058917081E-07	1.03280151874648E-08	5.72272607800417E-07	1.59660491193976E-07
501790	4158290	457.68798828125	5.07456644598972E-06	1.2906784841161E-07	4.48148834749381E-06	1.69838319324562E-06	2.71469124214631E-07	1.01360769204475E-08	5.6184231606663E-07	1.56747787312458E-07
501990	4158290	446.091003417969	5.587737126517E-06	1.37482890683896E-07	4.72202945263908E-06	1.7904752496539E-06	2.6443583109974E-07	9.87230525281594E-09	5.47301392077744E-07	1.52689971099768E-07
502190	4158290	448.587005615234	6.16993809095583E-06	1.46859057594243E-07	4.97691254984831E-06	1.88835198622946E-06	2.5560914691204E-07	9.54360877283605E-09	5.29043313523265E-07	1.47596678846228E-07
502390	4158290	454.692993164062	6.83337226679694E-06	1.57421183616217E-07	5.25031303134141E-06	1.99366318229716E-06	2.45219284240747E-07	9.15833424515074E-09	5.075450269064E-07	1.41600784004838E-07
502590	4158290	455.122009277344	7.59149626087005E-06	1.69418664140103E-07	5.54685171974E-06	2.10823502194983E-06	2.33525126751761E-07	8.72585231955702E-09	4.83342949614264E-07	1.34851715736243E-07
502790	4158290	440.307006835938	8.46211357963722E-06	1.83176802283589E-07	5.87240881845865E-06	2.23439652028364E-06	2.20802036705585E-07	8.2561222343307E-09	4.57007690318162E-07	1.27508421437191E-07
502990	4158290	439.726989746094	9.46674715390719E-06	1.99084232796041E-07	6.23381881737956E-06	2.37486144627241E-06	2.07329929688364E-07	7.75926335632156E-09	4.29119324581167E-07	1.19732481829721E-07
503190	4158290	442.127014160156	1.06266148045516E-05	2.17522174143421E-07	6.63755065814136E-06	2.53220704089537E-06	1.933823794344E-07	7.2451645101942E-09	4.00244804713005E-07	1.1168182095692E-07
503390	4158290	434.055999755859	1.19647735909379E-05	2.38899735137109E-07	7.09023943522706E-06	2.70908838074642E-06	1.79217328095593E-07	6.72315103131968E-09	3.70918697959818E-07	1.03505343041279E-07
503590	4158290	431.759002685547	1.350574622809E-05	2.63646239405627E-07	7.59848124043492E-06	2.90815947859474E-06	1.65069764348095E-07	6.20172226112375E-09	3.41628004759975E-07	9.53387053109839E-08
503790	4158290	430.988006591797	1.52757229659579E-05	2.92216316290472E-07	8.16841603414847E-06	3.13192611259212E-06	1.51146520143301E-07	5.68836486748549E-09	3.12801369861694E-07	8.73013138693393E-08
503990	4158290	421.81201171875	1.72936755399956E-05	3.24931706952757E-07	8.80283012158029E-06	3.38159956968706E-06	1.37623150795553E-07	5.18944109520775E-09	2.84802612624647E-07	7.94945223710223E-08
504190	4158290	410.984985351562	1.95765605154595E-05	3.6207360109411E-07	9.50327633277902E-06	3.65792038879519E-06	1.24642716419669E-07	4.71014491122226E-09	2.57928199892212E-07	7.20009282572235E-08
504390	4158290	408.43701171875	2.21313479616891E-05	4.03759480700793E-07	1.02675400922796E-05	3.96016566316191E-06	1.12316182575708E-07	4.25451413844403E-09	2.32408078910626E-07	6.48846030057219E-08
504590	4158290	403.191009521484	2.49486725268999E-05	4.49819608331907E-07	1.10875431691475E-05	4.28531395709982E-06	1.00724109307277E-07	3.82549110797193E-09	2.0840917832797E-07	5.8192067027887E-08
504790	4158290	398.881011962891	2.79940886533796E-05	4.99659529276508E-07	1.19473394558703E-05	4.62723445369413E-06	8.99192801470465E-08	3.42501812710458E-09	1.86040856401319E-07	5.19538075849943E-08
504990	4158290	397.976989746094	3.12000338707412E-05	5.52138444740402E-07	1.28223410430042E-05	4.9763299542875E-06	7.99299382957129E-08	3.05415229241074E-09	1.65361611297125E-07	4.61861462990071E-08
505190	4158290	402.356994628906	3.44359856137638E-05	6.05099324754251E-07	1.3676375184154E-05	5.31817460093055E-06	7.07633406604344E-08	2.7131927020196E-09	1.46386449190442E-07	4.08932905728106E-08
505390	4158290	401.174987792969	3.72269696133094E-05	6.50600591813942E-07	1.44049370624052E-05	5.60999524056145E-06	6.24093875353928E-08	2.40181034058493E-09	1.29094408957415E-07	3.60694285862725E-08
505590	4158290	396.574005126953	3.83177728808891E-05	6.67573676466342E-07	1.47472530549873E-05	5.7442563132599E-06	5.48441407966471E-08	2.11917414413083E-09	1.13435855420316E-07	3.17007599821096E-08
505790	4158290	391.446990966797	3.65106305002169E-05	6.35760961597023E-07	1.44492805453836E-05	5.61636900051922E-06	4.80330961417288E-08	1.86406838200798E-09	9.93392624016845E-08	2.77673845971669E-08
505990	4158290	376.731994628906	3.31639883066798E-05	5.78134174671099E-07	1.37936010121895E-05	5.34295360297798E-06	4.19341223973387E-08	1.6349983508271E-09	8.67173051946843E-08	2.42449990946321E-08
506190	4158290	367.470001220703	2.95865473768892E-05	5.1666868507228E-07	1.30435239447489E-05	5.03304215126935E-06	3.65000204883756E-08	1.43028199698796E-09	7.54721647693168E-08	2.11063737891184E-08
506390	4158290	362.932006835938	2.62097007675749E-05	4.58542238858602E-07	1.22804075867289E-05	4.72057236056123E-06	3.16806873249881E-08	1.24812810971857E-09	6.55000122067556E-08	1.83226017634908E-08
506590	4158290	358.821990966797	2.31617952827303E-05	4.05870072894078E-07	1.1526298681904E-05	4.41485009461047E-06	2.74248925506262E-08	1.08670047274112E-09	5.66946906196088E-08	1.5864124413917E-08
506790	4158290	359.972991943359	2.04573999954542E-05	3.58905672118414E-07	1.07841903415518E-05	4.11711749145001E-06	2.36816930487103E-08	9.44168947038264E-10	4.89506461516914E-08	1.37015478477997E-08
506990	4158290	361.022003173828	1.80639454699174E-05	3.1712955281325E-07	1.00513571038281E-05	3.82605929173139E-06	2.04015205517013E-08	8.18749016029652E-10	4.21651811443272E-08	1.18062706813723E-08
507190	4158290	352.963012695312	1.59471299339425E-05	2.79989022283396E-07	9.32721435677669E-06	3.54111094880803E-06	1.75369829059654E-08	7.087310558721E-10	3.62401137340801E-08	1.01509465567616E-08
507390	4158290	353.962005615234	1.40748226343419E-05	2.4696797349287E-07	8.61378994599493E-06	3.26267339809507E-06	1.50434210492778E-08	6.12500221251915E-10	3.10829316108741E-08	8.70980534529164E-09
507590	4158290	351.984008789062	1.24183743157433E-05	2.17608590567672E-07	7.91521583017754E-06	2.99194362708539E-06	1.28792638556675E-08	5.28550092840392E-10	2.66075259884254E-08	7.45885821542374E-09
507790	4158290	350.045013427734	1.09527448558164E-05	1.91512433629555E-07	7.23683480409824E-06	2.73059322202537E-06	1.10062188574884E-08	4.55490163065506E-10	2.2734585669649E-08	6.37600784926155E-09
507990	4158290	343.790985107422	9.65614589569452E-06	1.68333270390847E-07	6.58428026887145E-06	2.48043191165696E-06	9.38933347844586E-09	3.92048155442118E-10	1.9391723206224E-08	5.44108367149369E-09
508190	4158290	337.488006591797	8.5089558169404E-06	1.47758518637818E-07	5.96264132906282E-06	2.24309459192232E-06	7.99695765562347E-09	3.37069085039155E-10	1.65133965220049E-08	4.6358203317503E-09
508390	4158290	337.096008300781	7.49239870166249E-06	1.29487358369001E-07	5.37584146589426E-06	2.019803243371E-06	6.80063369068336E-09	2.89511756270017E-10	1.40406797540624E-08	3.94379423609847E-09
508590	4158290	339.440002441406	6.59294292098125E-06	1.13299721578866E-07	4.82711326561508E-06	1.81158232322763E-06	5.774934834E-09	2.48443308566258E-10	1.19209279909079E-08	3.35033044915395E-09
508790	4158290	328.347991943359	5.79841206840362E-06	9.89946538509441E-08	4.31841025524355E-06	1.61900719033695E-06	4.89727019721084E-09	2.1303234362956E-10	1.01073725236587E-08	2.84239008898417E-09
508990	4158290	328.852996826172	5.09753610739961E-06	8.63833556734471E-08	3.85046022081221E-06	1.44221888838312E-06	4.14767020231639E-09	1.82541445488254E-10	8.55867573776416E-09	2.40844655101098E-09
509190	4158290	329.817993164062	4.4799724893429E-06	7.52898403556367E-08	3.42295774085322E-06	1.28099401320285E-06	3.50856350925196E-09	1.56319529338844E-10	7.23846827168725E-09	2.03835689383744E-09
509390	4158290	327.829010009766	3.93630108513609E-06	6.55512678272991E-08	3.03477891343928E-06	1.13482237652776E-06	2.96455350694202E-09	1.33793997570306E-10	6.11488551258204E-09	1.72323290723467E-09
509590	4158290	325.850006103516	3.45800031495145E-06	5.70180104540992E-08	2.68419089312745E-06	1.0029826262283E-06	2.50220045758484E-09	1.14463012498768E-10	5.16011594615891E-09	1.45531541594423E-09
509790	4158290	326.467010498047	3.03740895261002E-06	4.95534821660244E-08	2.36904016641551E-06	8.8461004688428E-07	2.10981362603815E-09	9.78881524362474E-11	4.34997022213486E-09	1.22785436995837E-09
509990	4158290	331.566009521484	2.66767715729887E-06	4.30337592565371E-08	2.08691204341695E-06	7.78753845785112E-07	1.77725617663732E-09	8.36875211257111E-11	3.66347672352152E-09	1.03499631086997E-09
510190	4158290	330.941986083984	2.34270998521473E-06	3.7347032427751E-08	1.83525960306805E-06	6.84423313816662E-07	1.49576443560521E-09	7.15292782604018E-11	3.08250703369235E-09	8.71680092464305E-10
510390	4158290	334.822998046875	2.05710638014438E-06	3.23929331369011E-08	1.61150371439393E-06	6.00623473796856E-07	1.25778242350493E-09	6.11257764611889E-11	2.59143301345739E-09	7.33541446739653E-10
510590	4158290	353.501007080078	1.80609630943993E-06	2.80817749850555E-08	1.41310753418386E-06	5.26381468531933E-07	1.05681175094204E-09	5.22282213311883E-11	2.17681576453184E-09	6.16826407545096E-10
510790	4158290	362.815002441406	1.58547826850101E-06	2.43337428349258E-08	1.23762951461587E-06	4.60765164101003E-07	8.87276547069824E-10	4.46218350949225E-11	1.82712580103828E-09	5.18313397250906E-10
510990	4158290	365.089996337891	1.39155890765961E-06	2.10780634800846E-08	1.08275899685737E-06	4.02895459964878E-07	7.44402776121967E-10	3.81214966470271E-11	1.53249307451091E-09	4.35243596540424E-10
511190	4158290	350.010009765625	1.22109605141142E-06	1.82521854161679E-08	9.46338108278181E-07	3.51953664266058E-07	6.24111114030815E-10	3.25679274293342E-11	1.28448506886677E-09	3.65259174375683E-10
511390	4158290	344.912994384766	1.07124593977701E-06	1.58009814864976E-08	8.26373184374237E-07	3.07185104825373E-07	5.22922313246397E-10	2.78242432078175E-11	1.07591082708881E-09	3.06348677739947E-10
511590	4158290	312.817993164062	9.3951515146352E-07	1.36759919050534E-08	7.21038405388973E-07	2.67899957218766E-07	4.37874070190898E-10	2.37729492113764E-11	9.0064880477705E-10	2.5679907873548E-10
511790	4158290	258.072998046875	8.23717363545076E-07	1.18347146833889E-08	6.28673810637622E-07	2.33472074582245E-07	3.66448311641151E-10	2.03133273951287E-11	7.53496306611529E-10	2.15153845096448E-10
511990	4158290	224.852996826172	7.21934863287702E-07	1.02399466354102E-08	5.47779415718971E-07	2.03336443448825E-07	3.06507802916901E-10	1.73591164542803E-11	6.30038256763562E-10	1.80176363482005E-10
512190	4158290	215.309997558594	6.32484603477264E-07	8.85918167697286E-09	4.77006779135194E-07	1.76985755642053E-07	2.56241109411487E-10	1.48364993177277E-11	5.26533272955355E-10	1.50818186848922E-10
512390	4158290	206.063003540039	5.53888448544818E-07	7.66406295006856E-09	4.15149004804126E-07	1.53966449891819E-07	2.141149675311E-10	1.26823620308258E-11	4.39815090587285E-10	1.26191560254498E-10
512590	4158290	200.727005004883	4.848472283315E-07	6.62988702702153E-09	3.61129939433297E-07	1.33874495895151E-07	1.78833164623951E-10	1.0842755719833E-11	3.67207481660931E-10	1.05545681895897E-10
512790	4158290	198.102005004883	4.24218175116421E-07	5.7351586282997E-09	3.13993106428223E-07	1.16351115291698E-07	1.49301154733157E-10	9.27158985029683E-12	3.06451028520195E-10	8.82462843131477E-11
512990	4158290	196.117004394531	3.70995354645212E-07	4.96119543250931E-09	2.72890782346131E-07	1.01078585826745E-07	1.24595696132172E-10	7.92951865666509E-12	2.55640303496497E-10	7.37581227211821E-11
513190	4158290	210.102996826172	3.24292700689362E-07	4.29177615191766E-09	2.37073465129195E-07	8.77762143248307E-08	1.03938845866021E-10	6.78297069242507E-12	2.13170085570727E-10	6.16299699390926E-11
513390	4158290	187.522994995117	2.83329301131167E-07	3.71282696253185E-09	2.05879900530286E-07	7.61965354447092E-08	8.66757132058164E-11	5.80329018925846E-12	1.77689356796877E-10	5.14817608164386E-11
513590	4158290	157.208999633789	2.47416624588639E-07	3.2121465396712E-09	1.78727778923488E-07	6.61217769256873E-08	7.22555003722817E-11	4.96603575196964E-12	1.48062090723183E-10	4.29936571201667E-11
513790	4158290	130.205993652344	2.15947412134024E-07	2.77916303121702E-09	1.55105150922068E-07	5.73606045940221E-08	6.02153395164688E-11	4.2503502812357E-12	1.23333837568696E-10	3.58967051508275E-11
513990	4158290	94.5849990844727	1.88385997518312E-07	2.40472218080101E-09	1.34562578580599E-07	4.97451527374384E-08	5.0166580552432E-11	3.63844986687045E-12	1.02703380587151E-10	2.99649283542717E-11
514190	4158290	63.1780014038086	1.64259850322285E-07	2.08090084382608E-09	1.16706007851335E-07	4.31283310422767E-08	4.17831362576993E-11	3.11517070072429E-12	8.54986452756666E-11	2.50085926880068E-11
514390	4158290	35.8520011901855	1.43152170195974E-07	1.80084400256952E-09	1.01190337230267E-07	3.73813978780258E-08	3.47916046213915E-11	2.66758009660123E-12	7.11562914670956E-11	2.08684977558111E-11
514590	4158290	8.93299961090088	1.24695385668558E-07	1.55862277392844E-09	8.77136426245071E-08	3.23917839353279E-08	2.8962907588752E-11	2.28465023569598E-12	5.92044256408173E-11	1.74111431758423E-11
514790	4158290	0	1.08565434642113E-07	1.3491105456313E-09	7.60120157069531E-08	2.80611489868415E-08	2.41052281677039E-11	1.95697292116123E-12	4.9248026038174E-11	1.45246459638386E-11
482590	4158490	230.434997558594	1.44015961917383E-10	3.2164591431175E-11	6.40697664635941E-11	4.37020285083403E-11	4.8829519497976E-13	1.90638575745523E-13	7.19731672576521E-13	3.31312994050704E-13
482790	4158490	225.856994628906	1.62735723035476E-10	3.60656994600799E-11	7.35100726238136E-11	4.96045336870607E-11	5.76645474084315E-13	2.19448196187161E-13	8.61746291209611E-13	3.90216642111618E-13
482990	4158490	207.682998657227	1.83843392641649E-10	4.04230676029149E-11	8.43202100289212E-11	5.62931996800554E-11	6.81249171378543E-13	2.52508939225036E-13	1.03175369442097E-12	4.59682103991039E-13
483190	4158490	206.082000732422	2.07633435590434E-10	4.52873790222746E-11	9.66956616470971E-11	6.38709767376783E-11	8.05144868866197E-13	2.90433402610396E-13	1.23526923350006E-12	5.41625056193411E-13
483390	4158490	204.087005615234	2.34434703938053E-10	5.07145391952948E-11	1.10859332960058E-10	7.24540482453855E-11	9.51947507506793E-13	3.33920894298572E-13	1.47889535055643E-12	6.3831375637058E-13
483590	4158490	232.951995849609	2.64614139637793E-10	5.67661568056675E-11	1.27065338947845E-10	8.21735042959027E-11	1.12595908388474E-12	3.83769703649136E-13	1.77053614872298E-12	7.5243507737523E-13
483790	4158490	260.877990722656	2.98580802613894E-10	6.35099391296686E-11	1.45603296311936E-10	9.31771426976417E-11	1.3323002180931E-12	4.40889364092899E-13	2.11965414700662E-12	8.87171744980958E-13
483990	4158490	256.951995849609	3.36790323797496E-10	7.10202670476426E-11	1.66803217765612E-10	1.05631602117504E-10	1.57706805744572E-12	5.06316820501437E-13	2.53757821961057E-12	1.04629604575788E-12
484190	4158490	292.587005615234	3.79749784040814E-10	7.93788199551332E-11	1.91041075305131E-10	1.1972476841562E-10	1.86752492854153E-12	5.8123506182534E-13	3.03787257061852E-12	1.23428156533454E-12
484390	4158490	306.295989990234	4.28023027268655E-10	8.86751503342433E-11	2.18745113786017E-10	1.35668419309509E-10	2.21232314463285E-12	6.66992921430373E-13	3.63677863454345E-12	1.45643516351055E-12
484590	4158490	295.015014648438	4.82235793951953E-10	9.90072741777731E-11	2.50401857824464E-10	1.53700768557104E-10	2.62171189726855E-12	7.65126615325693E-13	4.35361559977655E-12	1.71901923074803E-12
484790	4158490	293.973999023438	5.430812492194E-10	1.10482292066778E-10	2.86562792701965E-10	1.74089272808217E-10	3.10776498580503E-12	8.77382746192777E-13	5.21122094868899E-12	2.02938565538621E-12
484990	4158490	315.449005126953	6.11329005969964E-10	1.23217025806042E-10	3.27857387203431E-10	1.97135735516497E-10	3.68494956061502E-12	1.00575286953829E-12	6.23709539826269E-12	2.39630546902081E-12
485190	4158490	298.756988525391	6.87831668644381E-10	1.37338841219085E-10	3.75001725273505E-10	2.23179946392944E-10	4.37048030719132E-12	1.15250710050211E-12	7.46409501101976E-12	2.83017745439976E-12
485390	4158490	281.480010986328	7.73532977923018E-10	1.52986387897309E-10	4.28810136985689E-10	2.52604349290736E-10	5.18483372249034E-12	1.32023178615829E-12	8.93145214450677E-12	3.34332712400287E-12
485590	4158490	268.480987548828	8.6947673304638E-10	1.70310346761516E-10	4.90208505440598E-10	2.85839319431425E-10	6.15236534077587E-12	1.51187378070429E-12	1.06860030525848E-11	3.95036546412602E-12
485790	4158490	226.828994750977	9.76816595061669E-10	1.89474264231235E-10	5.6024936862144E-10	3.2336914335444E-10	7.30204345543869E-12	1.73079176562979E-12	1.27836493764391E-11	4.66861500739647E-12
485990	4158490	230.962005615234	1.09682672825178E-09	2.10655228042038E-10	6.40129054382814E-10	3.65738630610137E-10	8.66831792986431E-12	1.98081163463598E-12	1.5291097313103E-11	5.51861268019376E-12
486190	4158490	208.839996337891	1.23091358246373E-09	2.34044701560012E-10	7.31207129946999E-10	4.13560661546815E-10	1.02921538041032E-11	2.26629251527815E-12	1.82879265787047E-11	6.5247081024484E-12
486390	4158490	207.115005493164	1.38062882809477E-09	2.59849304841599E-10	8.35028476507189E-10	4.67524647603359E-10	1.22222569881049E-11	2.5922010843553E-12	2.18690505666352E-11	7.71577193479739E-12
486590	4158490	216.641998291016	1.54768376679967E-09	2.88291805086004E-10	9.53348350395496E-10	5.28406202618472E-10	1.45165314005705E-11	2.96420052424493E-12	2.61476405155862E-11	9.12603828546024E-12
486790	4158490	187.005996704102	1.73396516260421E-09	3.19611892353752E-10	1.08816082988327E-09	5.9707789748361E-10	1.72438034766054E-11	3.38874805094397E-12	3.12585993460549E-11	1.07960994806822E-11
486990	4158490	161.509994506836	1.94155290851004E-09	3.54067087243406E-10	1.24173114472193E-09	6.74521499403543E-10	2.04858681892104E-11	3.87320957484281E-12	3.73626877515702E-11	1.27740867490528E-11
487190	4158490	131.121994018555	2.17273978741298E-09	3.9193371145845E-10	1.41663240438207E-09	7.61841837569014E-10	2.43399142431738E-11	4.42599269381825E-12	4.46514218859468E-11	1.51170694139551E-11
487390	4158490	126.769996643066	2.43005331843896E-09	4.33507304864231E-10	1.61578704985991E-09	8.6028201764783E-10	2.89213857039154E-11	5.05668544129919E-12	5.33528729352288E-11	1.78926979761782E-11
487590	4158490	124.761001586914	2.71628064892643E-09	4.79103534953913E-10	1.84251416946187E-09	9.71241066115991E-10	3.4367378127006E-11	5.77622800641761E-12	6.37385508371658E-11	2.11811595159318E-11
487790	4158490	85.9240036010742	3.03449685589932E-09	5.29059442874372E-10	2.10058337501217E-09	1.09629415576503E-09	4.08406617466376E-11	6.59711881552548E-12	7.61315651705394E-11	2.50774977278399E-11
487990	4158490	81.8580017089844	3.38809673198466E-09	5.83734144611398E-10	2.39427571274904E-09	1.23721501894747E-09	4.85344258669834E-11	7.53363644709479E-12	9.09162757754498E-11	2.96943404617371E-11
488190	4158490	102.763000488281	3.78083110675279E-09	6.43509731419788E-10	2.72845291936541E-09	1.39600149760199E-09	5.76778867178992E-11	8.60209963149559E-12	1.08549712614346E-10	3.51651253922922E-11
488390	4158490	128.106002807617	4.21684840042883E-09	7.08792300303267E-10	3.1086360754588E-09	1.5749045651783E-09	6.85429077673193E-11	9.82116884772416E-12	1.29575075101683E-10	4.16479088360542E-11
488590	4158490	137.460998535156	4.70074273264979E-09	7.8001394807169E-10	3.54109537003938E-09	1.77646197216622E-09	8.14518168869139E-11	1.12122177404916E-11	1.54637678770887E-10	4.93298762063088E-11
488790	4158490	139.089996337891	5.23760772681491E-09	8.57631027588129E-10	4.0329508955089E-09	2.0035334754849E-09	9.67865788446566E-11	1.2799655093923E-11	1.84503758454249E-10	5.84325752188264E-11
488990	4158490	147.697006225586	5.83310016192395E-09	9.4212756147041E-10	4.59228767853231E-09	2.25934450386891E-09	1.14999648206336E-10	1.46114384253797E-11	2.20082653352504E-10	6.92181885609598E-11
489190	4158490	150.074996948242	6.49351287514565E-09	1.03401648506717E-09	5.22828631033256E-09	2.54753405817967E-09	1.36626708094495E-10	1.66795985666782E-11	2.62452923249598E-10	8.19968592755127E-11
489390	4158490	152.444000244141	7.22585889099309E-09	1.1338409673964E-09	5.9513708642419E-09	2.8722088952142E-09	1.62301635498885E-10	1.90408395535344E-11	3.12893068428439E-10	9.71352948353773E-11
489590	4158490	158.962005615234	8.03796879279562E-09	1.24217626803096E-09	6.77337654632572E-09	3.23800517021972E-09	1.92774066101996E-10	2.17372380616432E-11	3.72917622076182E-10	1.15066872010098E-10
489790	4158490	170.677993774414	8.93860368410316E-09	1.35963238299364E-09	7.70773959617384E-09	3.65015860778731E-09	2.28929992584117E-10	2.48170616337392E-11	4.44319498541369E-10	1.363034914028E-10
489990	4158490	196.184997558594	9.93758536215266E-09	1.48685624593174E-09	8.76971246986549E-09	4.11458350438429E-09	2.71815847392265E-10	2.83356852663781E-11	5.29219607428153E-10	1.61449435035684E-10
490190	4158490	202.315002441406	1.10459464966476E-08	1.62453420956913E-09	9.97660697668036E-09	4.63796199008159E-09	3.22666641619228E-10	3.23566407640536E-11	6.3012489258467E-10	1.91217560264207E-10
490390	4158490	204.34700012207	1.22761037487861E-08	1.77339580126899E-09	1.13480678857341E-08	5.22784509312204E-09	3.8293881593572E-10	3.6952846388187E-11	7.49996111854589E-10	2.26448214609284E-10
490590	4158490	203.145004272461	1.36420589948312E-08	1.9342190976229E-09	1.29063830499027E-08	5.89276800888189E-09	4.54348520685561E-10	4.22080450064357E-11	8.92326844509915E-10	2.68131287355247E-10
490790	4158490	214.035995483398	1.51596295512134E-08	2.10783551518449E-09	1.46768325118555E-08	6.64237905122836E-09	5.38916069140804E-10	4.82184101828937E-11	1.0612354043341E-09	3.17431814010875E-10
490990	4158490	222.697006225586	1.68467118924035E-08	2.29513584177452E-09	1.66880800552208E-08	7.48758470317433E-09	6.39017502101213E-10	5.50944001038589E-11	1.26157152257539E-09	3.75719687717754E-10
491190	4158490	229.65299987793	1.87235861396137E-08	2.49707876728057E-09	1.8972615533448E-08	8.44071457774392E-09	7.57444266423227E-10	6.29629229331547E-11	1.49903988341724E-09	4.44604077758843E-10
491390	4158490	242.824996948242	2.08132696320177E-08	2.7146981201036E-09	2.15672696336324E-08	9.51571166969169E-09	8.97472042504583E-10	7.196971467888E-11	1.78034277180741E-09	5.25973083014856E-10
491590	4158490	254.10400390625	2.31419286327274E-08	2.94911200245623E-09	2.45138161816222E-08	1.07283553902133E-08	1.06293994052267E-09	8.22820554220245E-11	2.11334431797075E-09	6.2203937299573E-10
491790	4158490	256.686004638672	2.57392987131636E-08	3.20153736187024E-09	2.78594987433691E-08	1.2096460777434E-08	1.2583413987089E-09	9.40920487114432E-11	2.50725900761163E-09	7.35392690855659E-10
[truncated: 26,984 more rows]
